# Supplementary material for: PNGSeqR: An R Package for Rapid Candidate Gene Selection through Pooled Next-Generation Sequencing
Source: MDPI journal article supplement (doi:10.3390/plants11141821), 2022-07-11
Supplement: s1 [file s1]

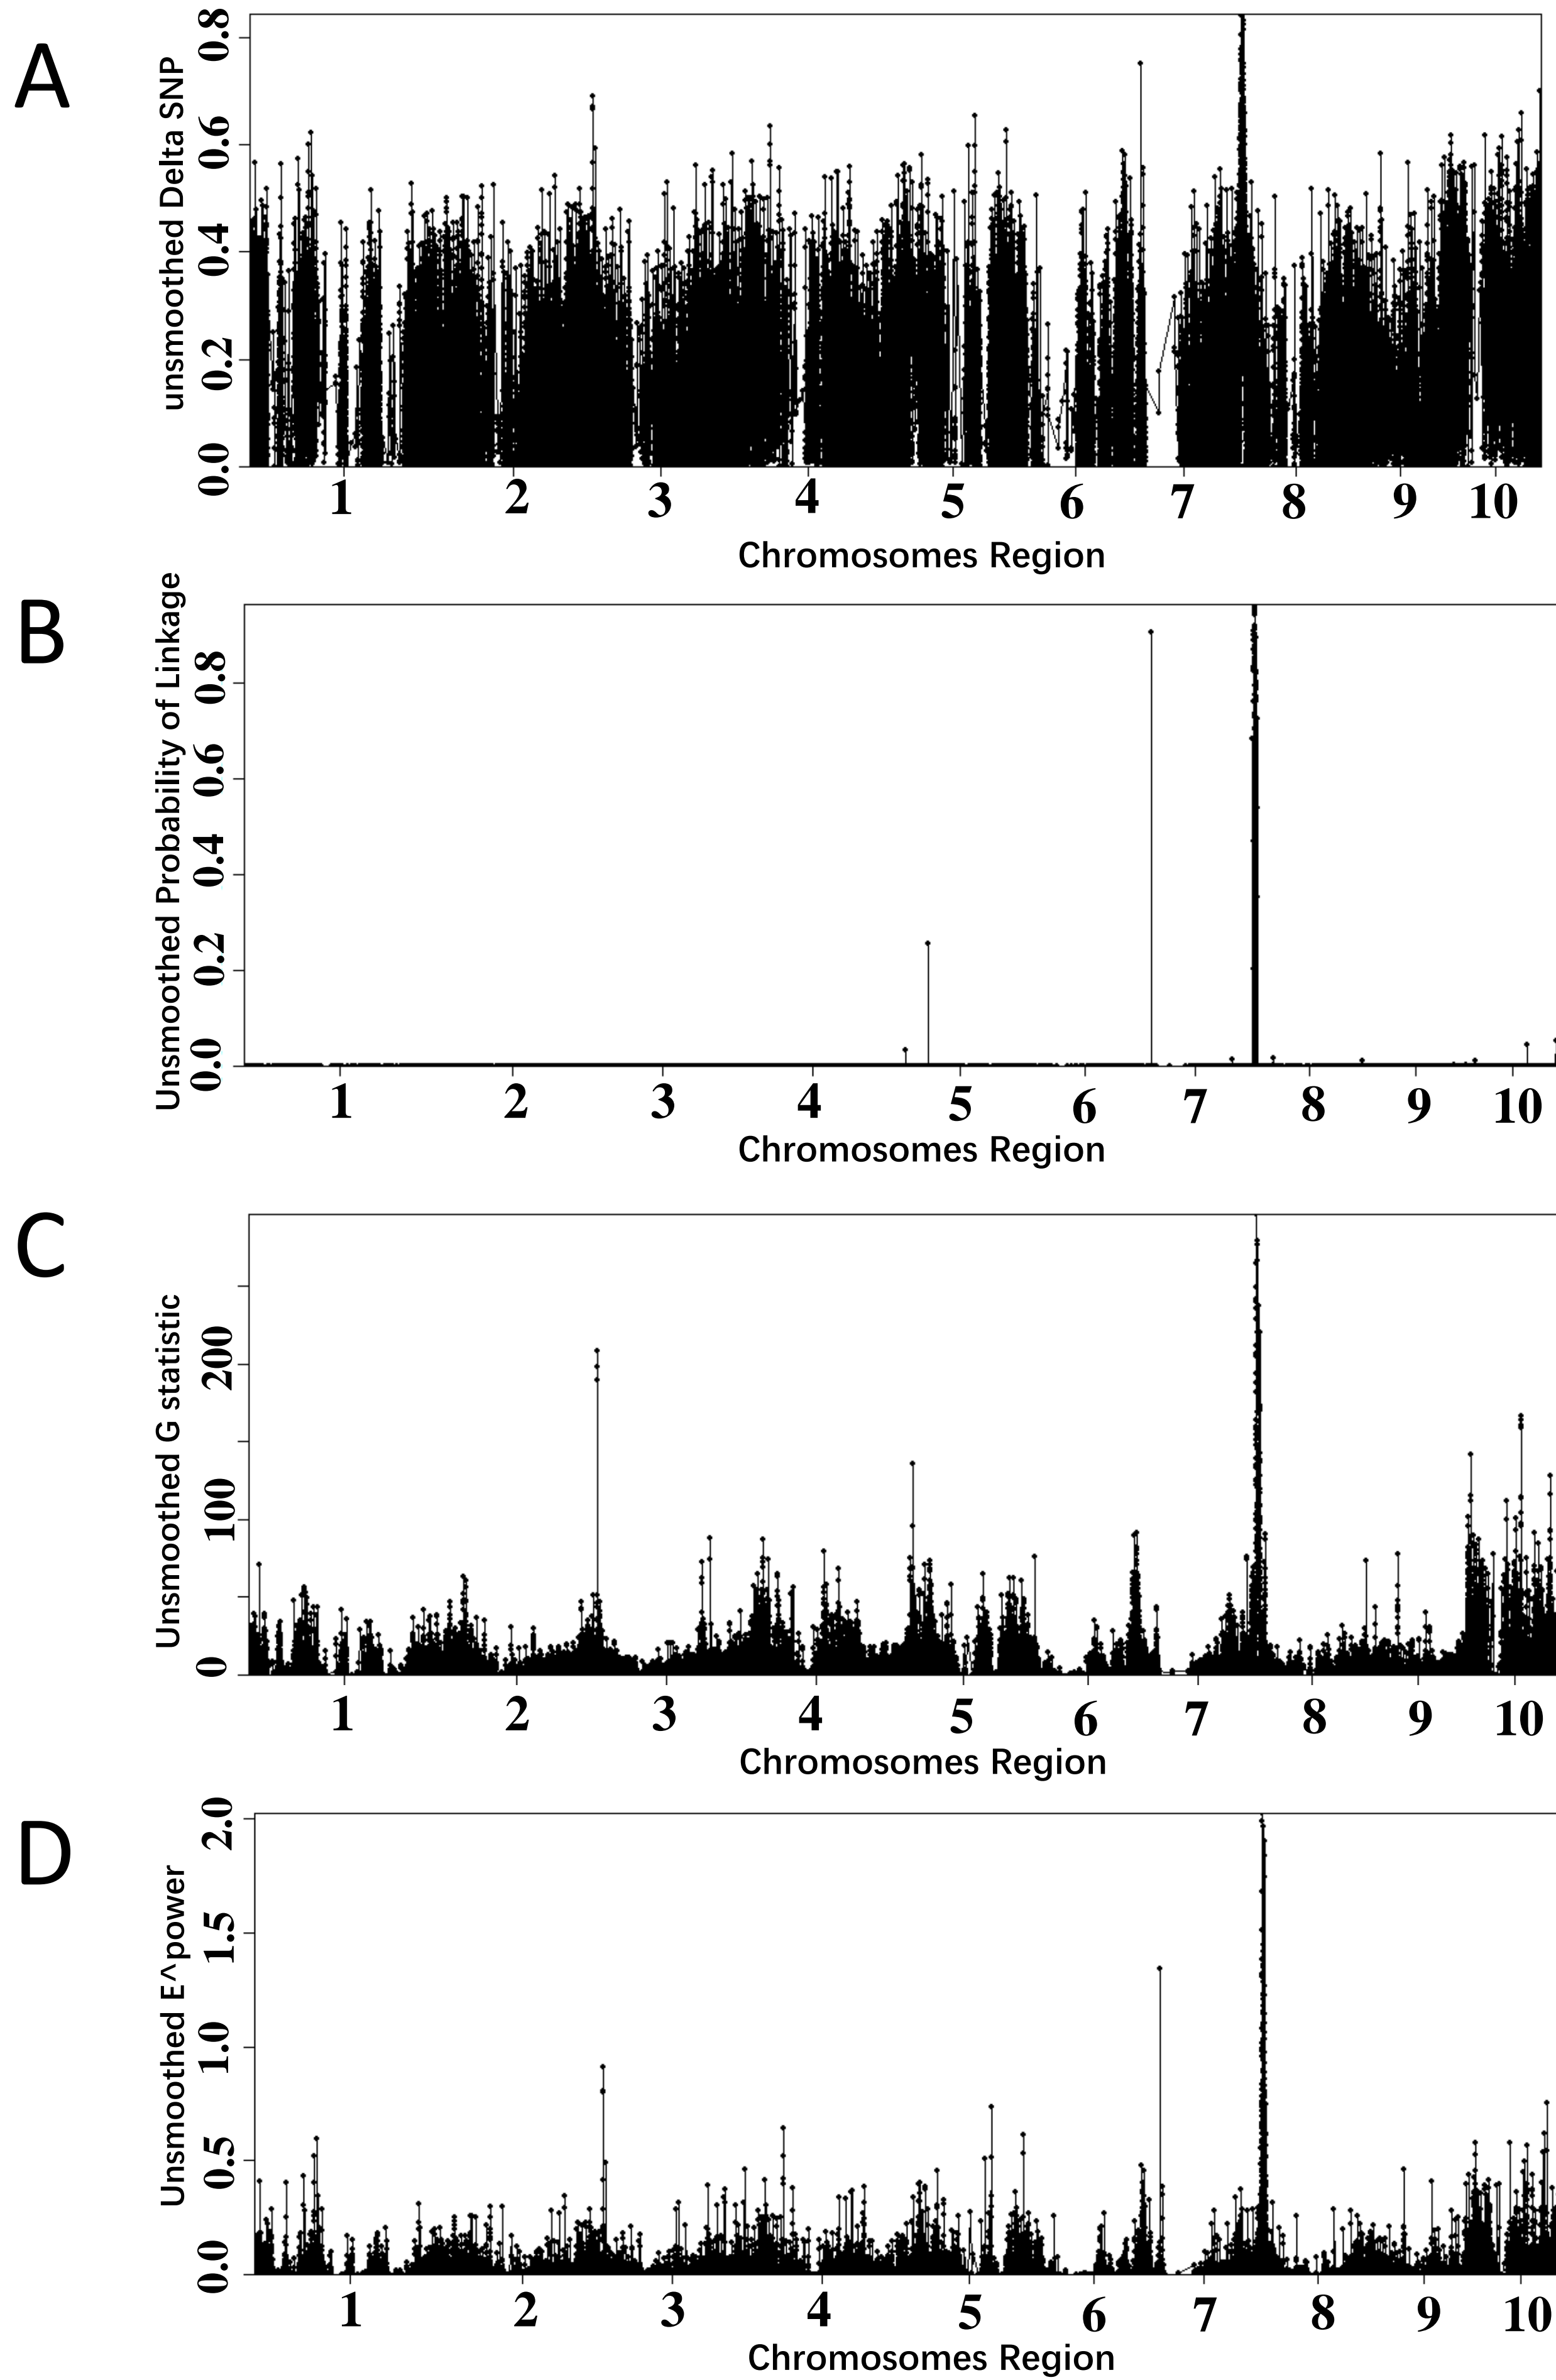

**Figure S1.** The distribution of unsmooth statistics for example 1 across the whole genome. A–D indicate the plots of unsmoothed  $\Delta$ SNP, Bayes, G-test, and ED algorithms, respectively.

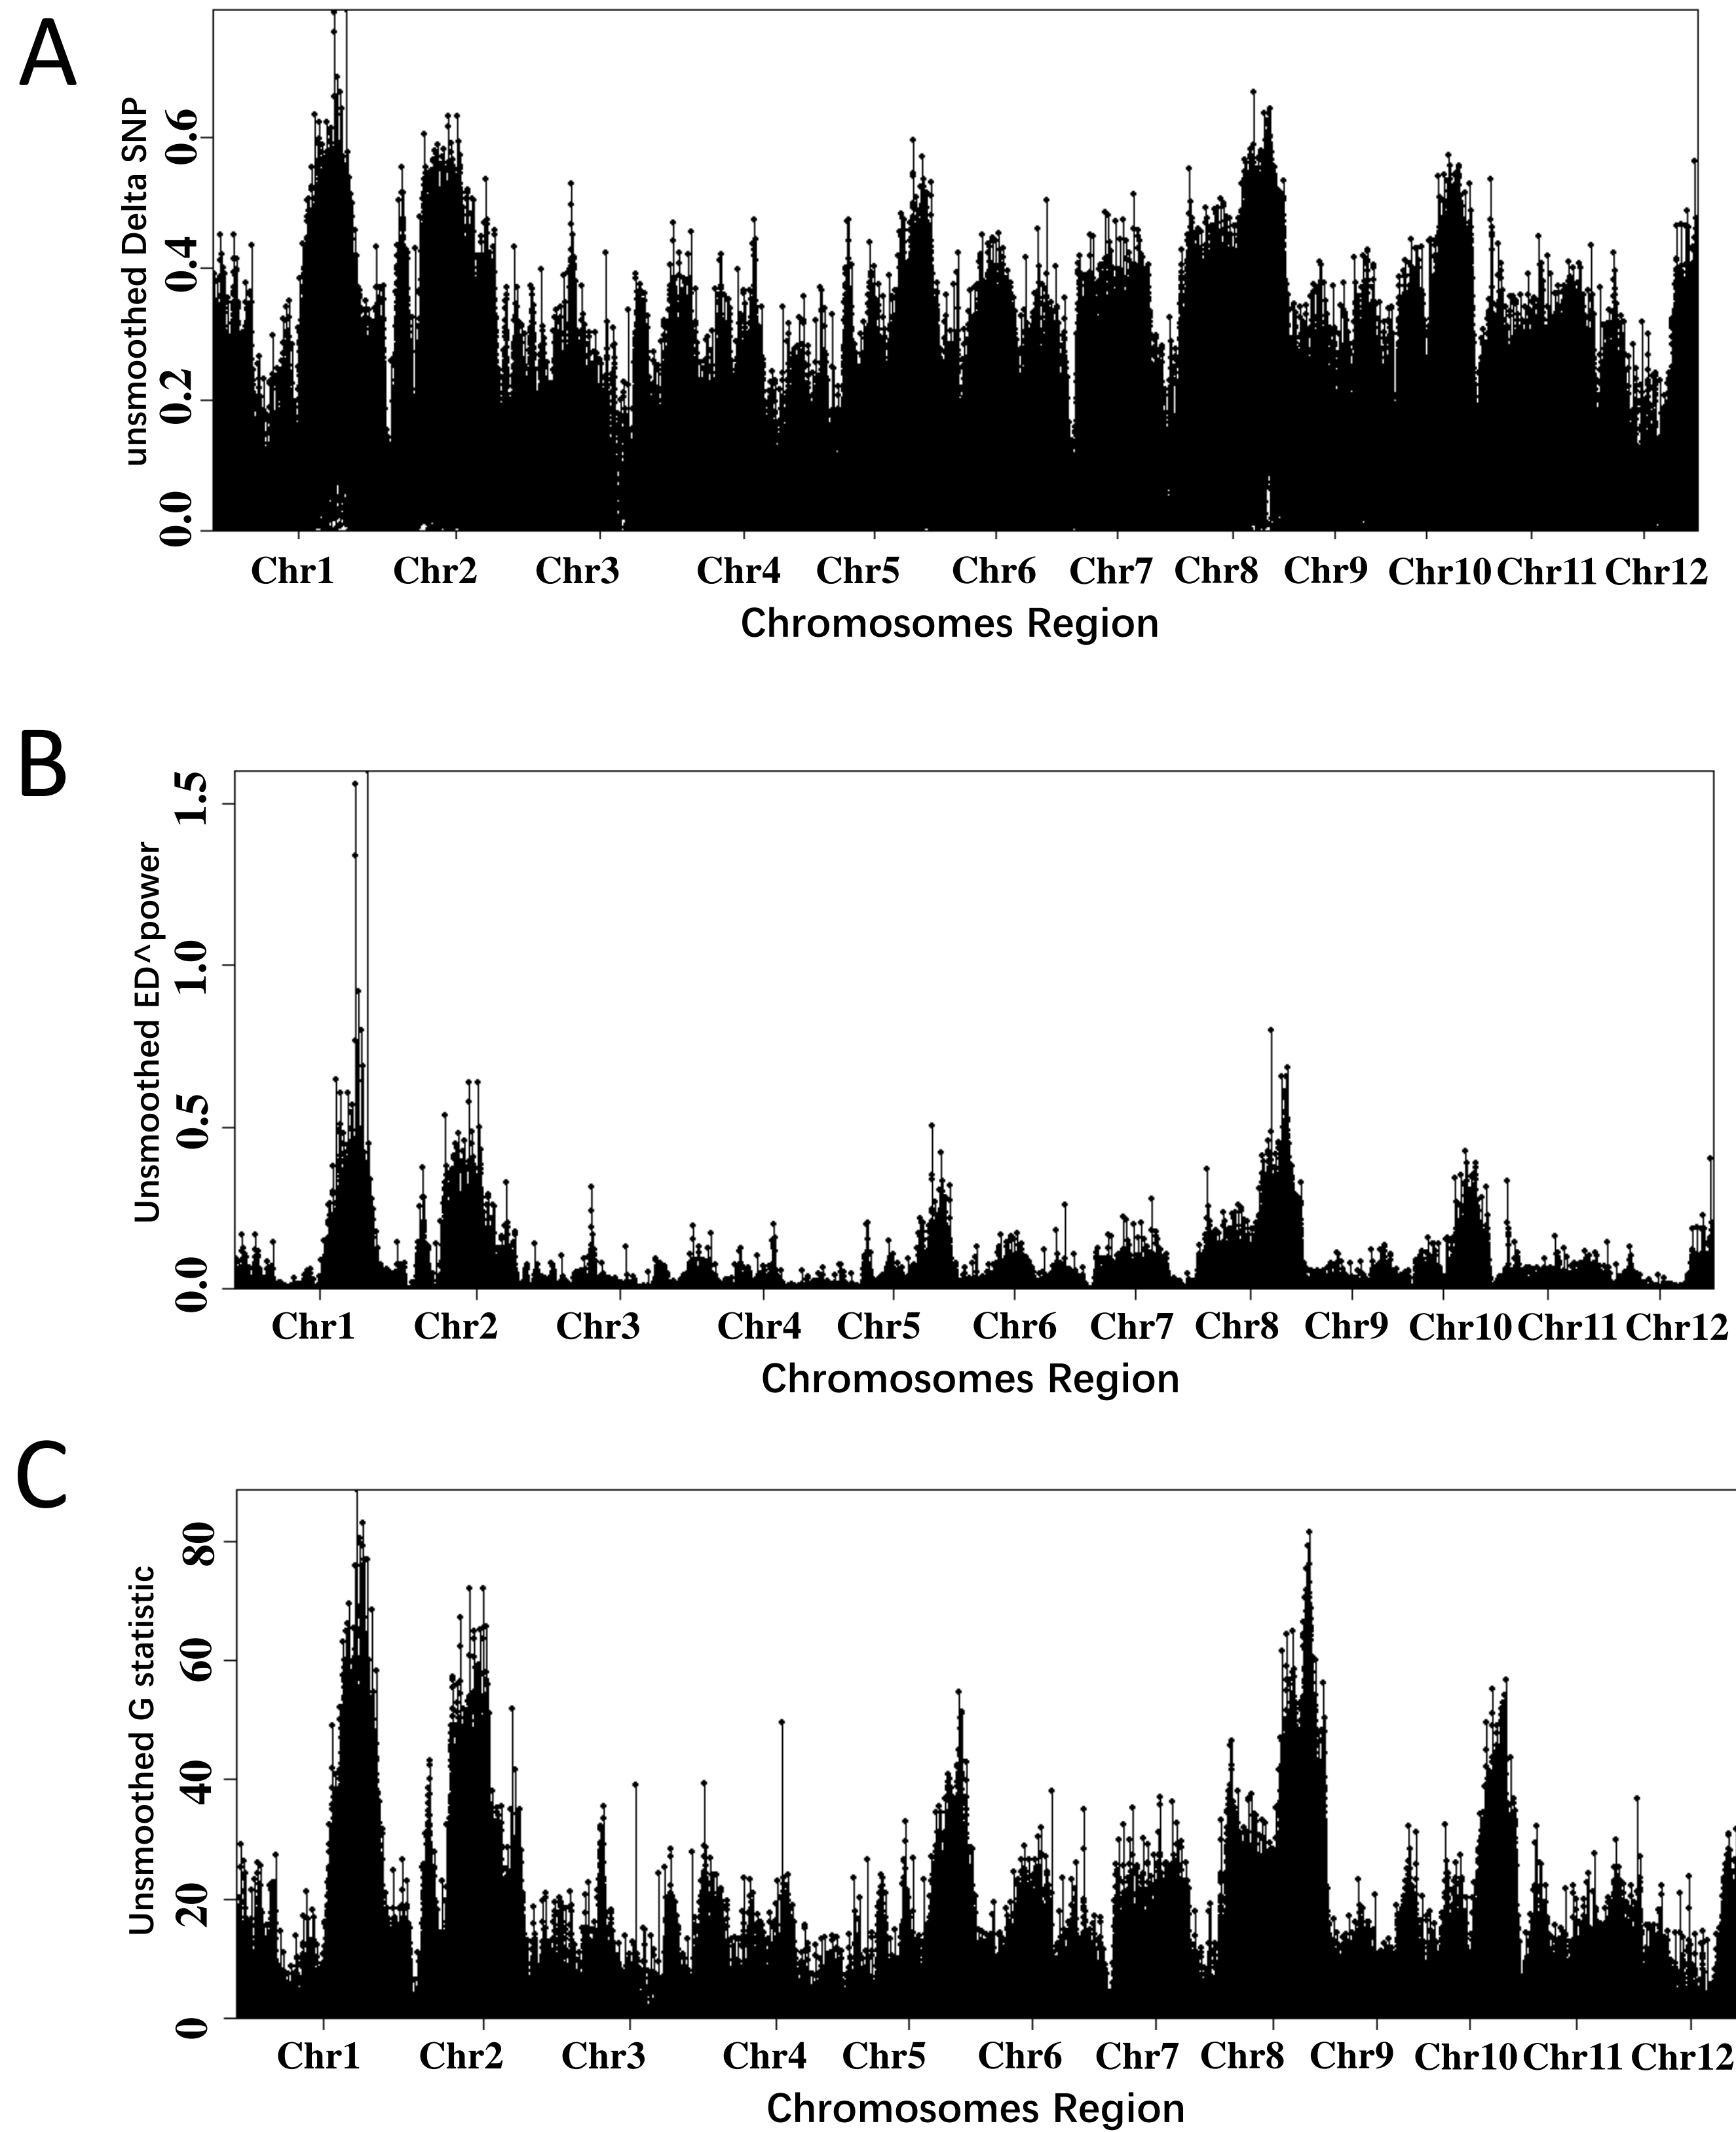

**Figure S2.** The distribution of unsmooth statistics for example 2 across the whole genome. A–D indicate the plots of unsmoothed  $\Delta$ SNP, ED, and G-test algorithms, respectively.

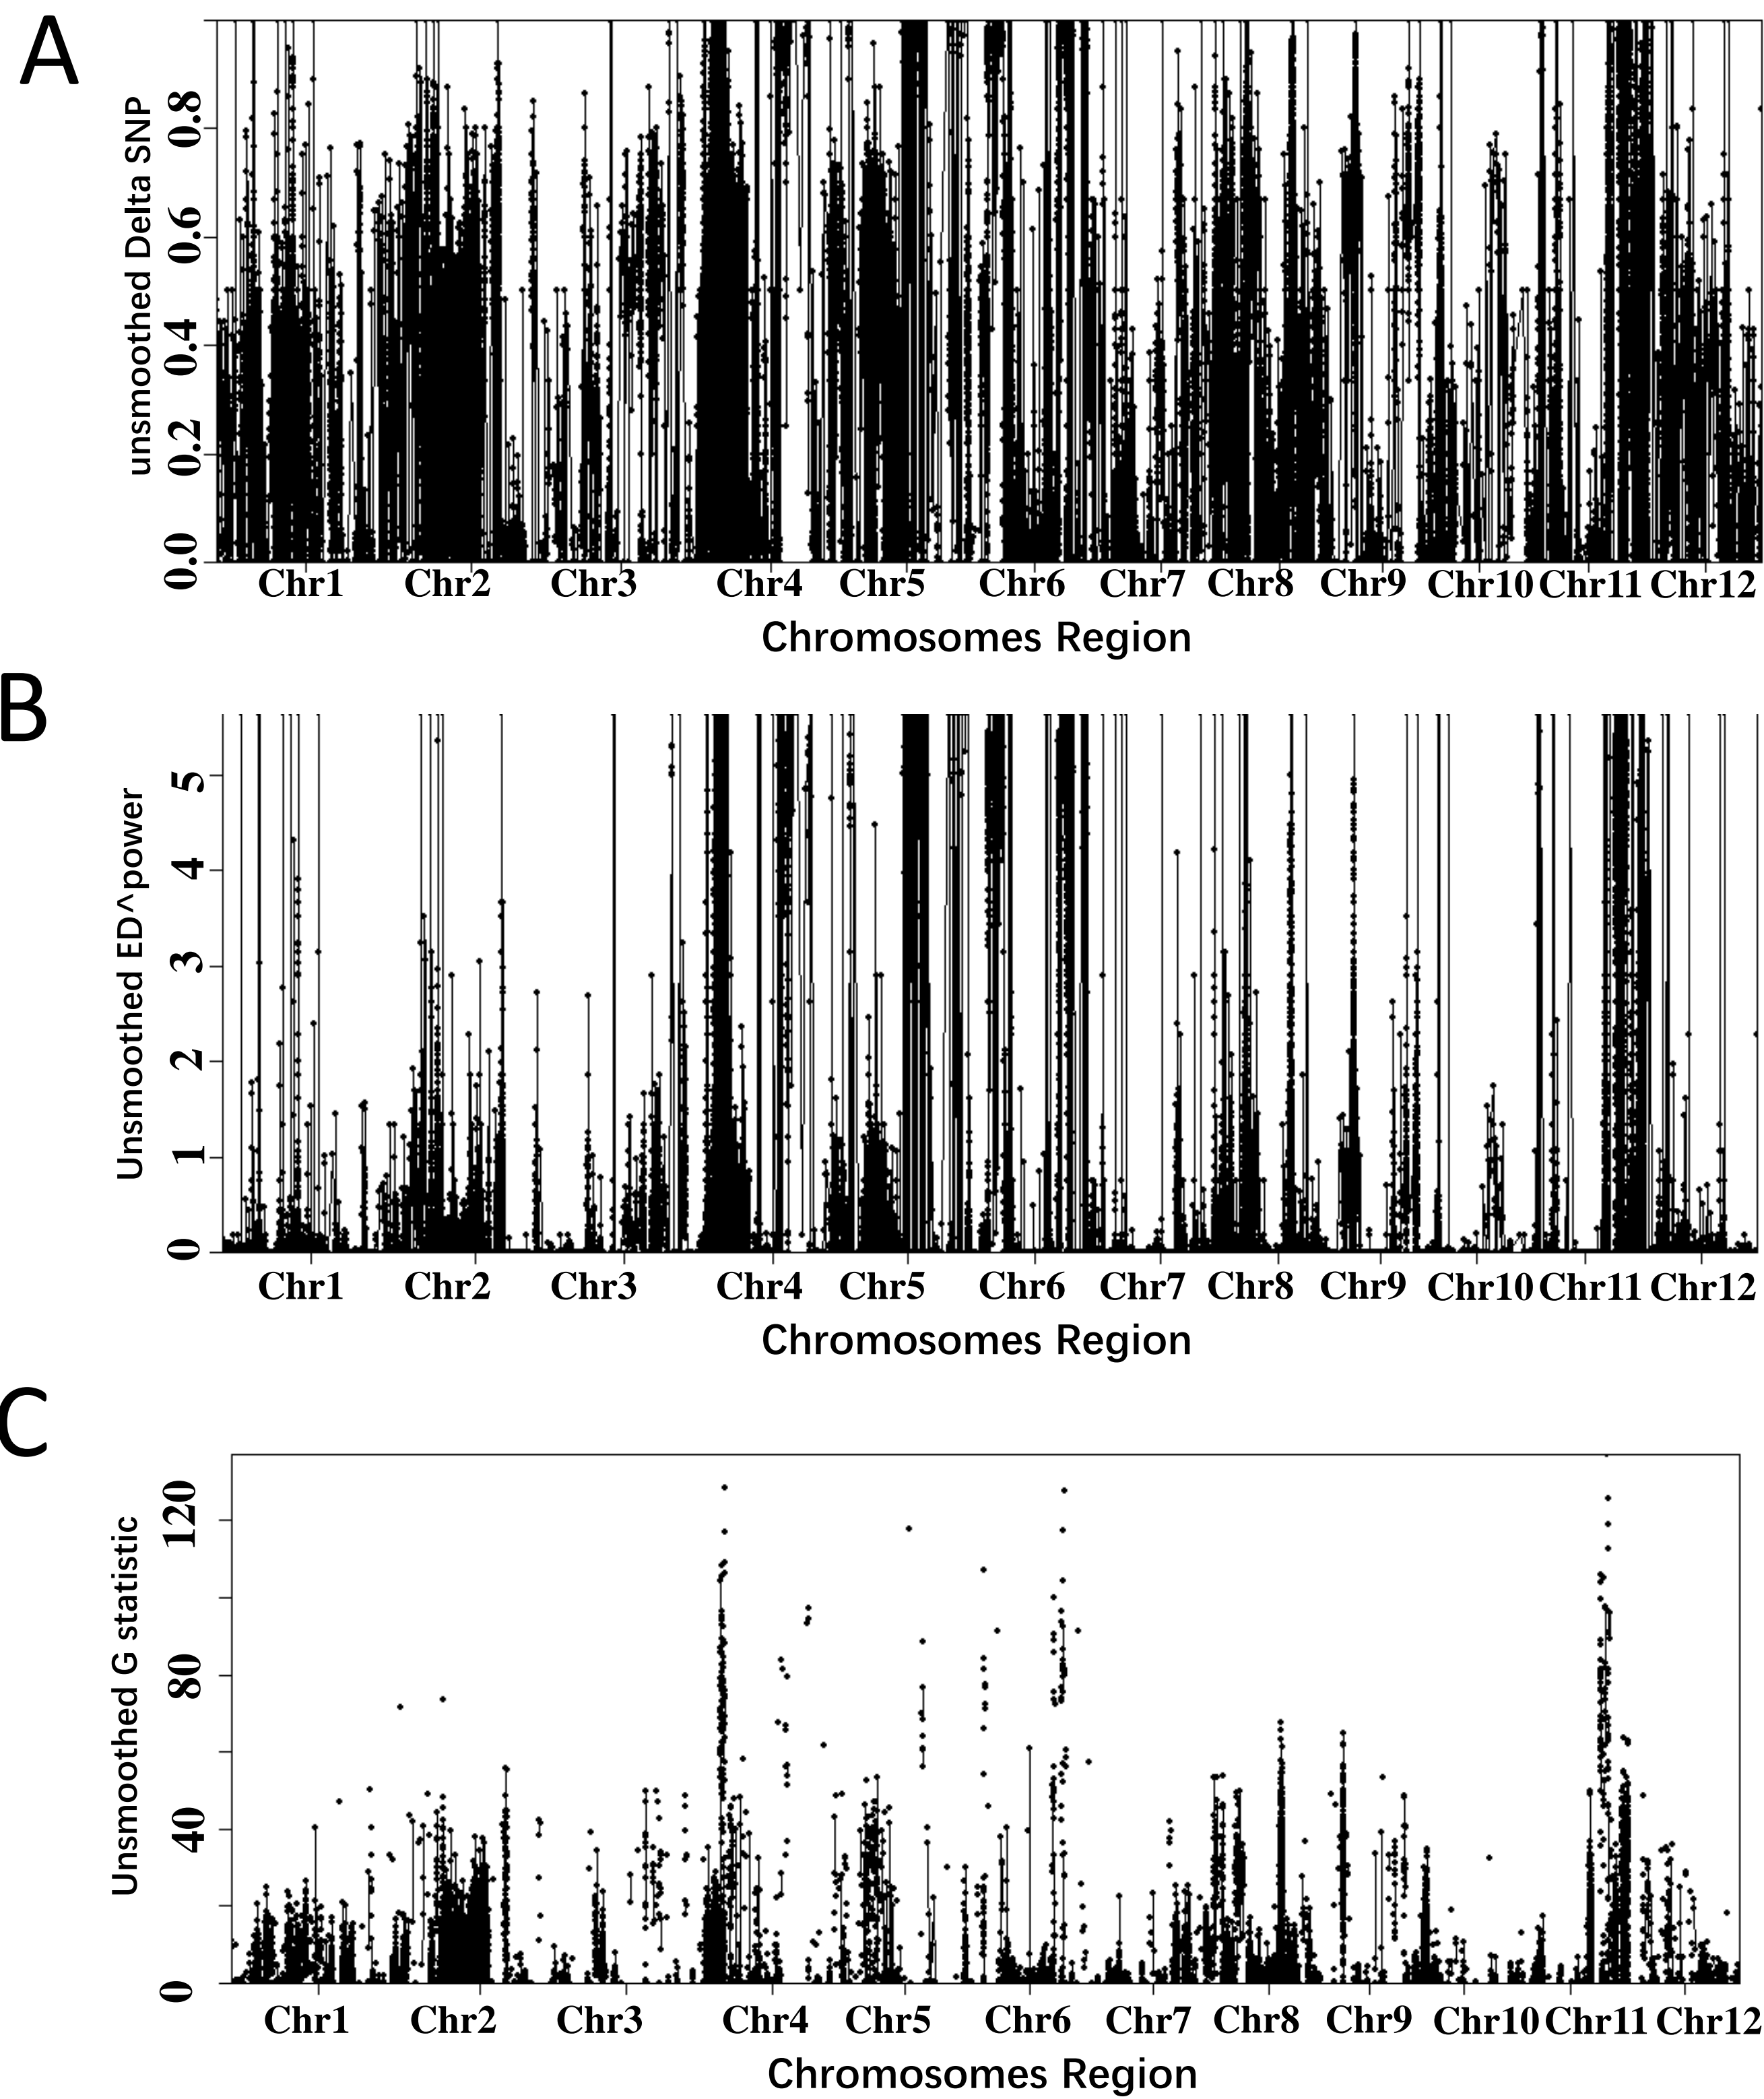

**Figure S3.** The distribution of unsmooth statistics for example 3 across the whole genome. A–D indicate the plots of unsmoothed  $\Delta$ SNP, ED, and G-test algorithms, respectively.

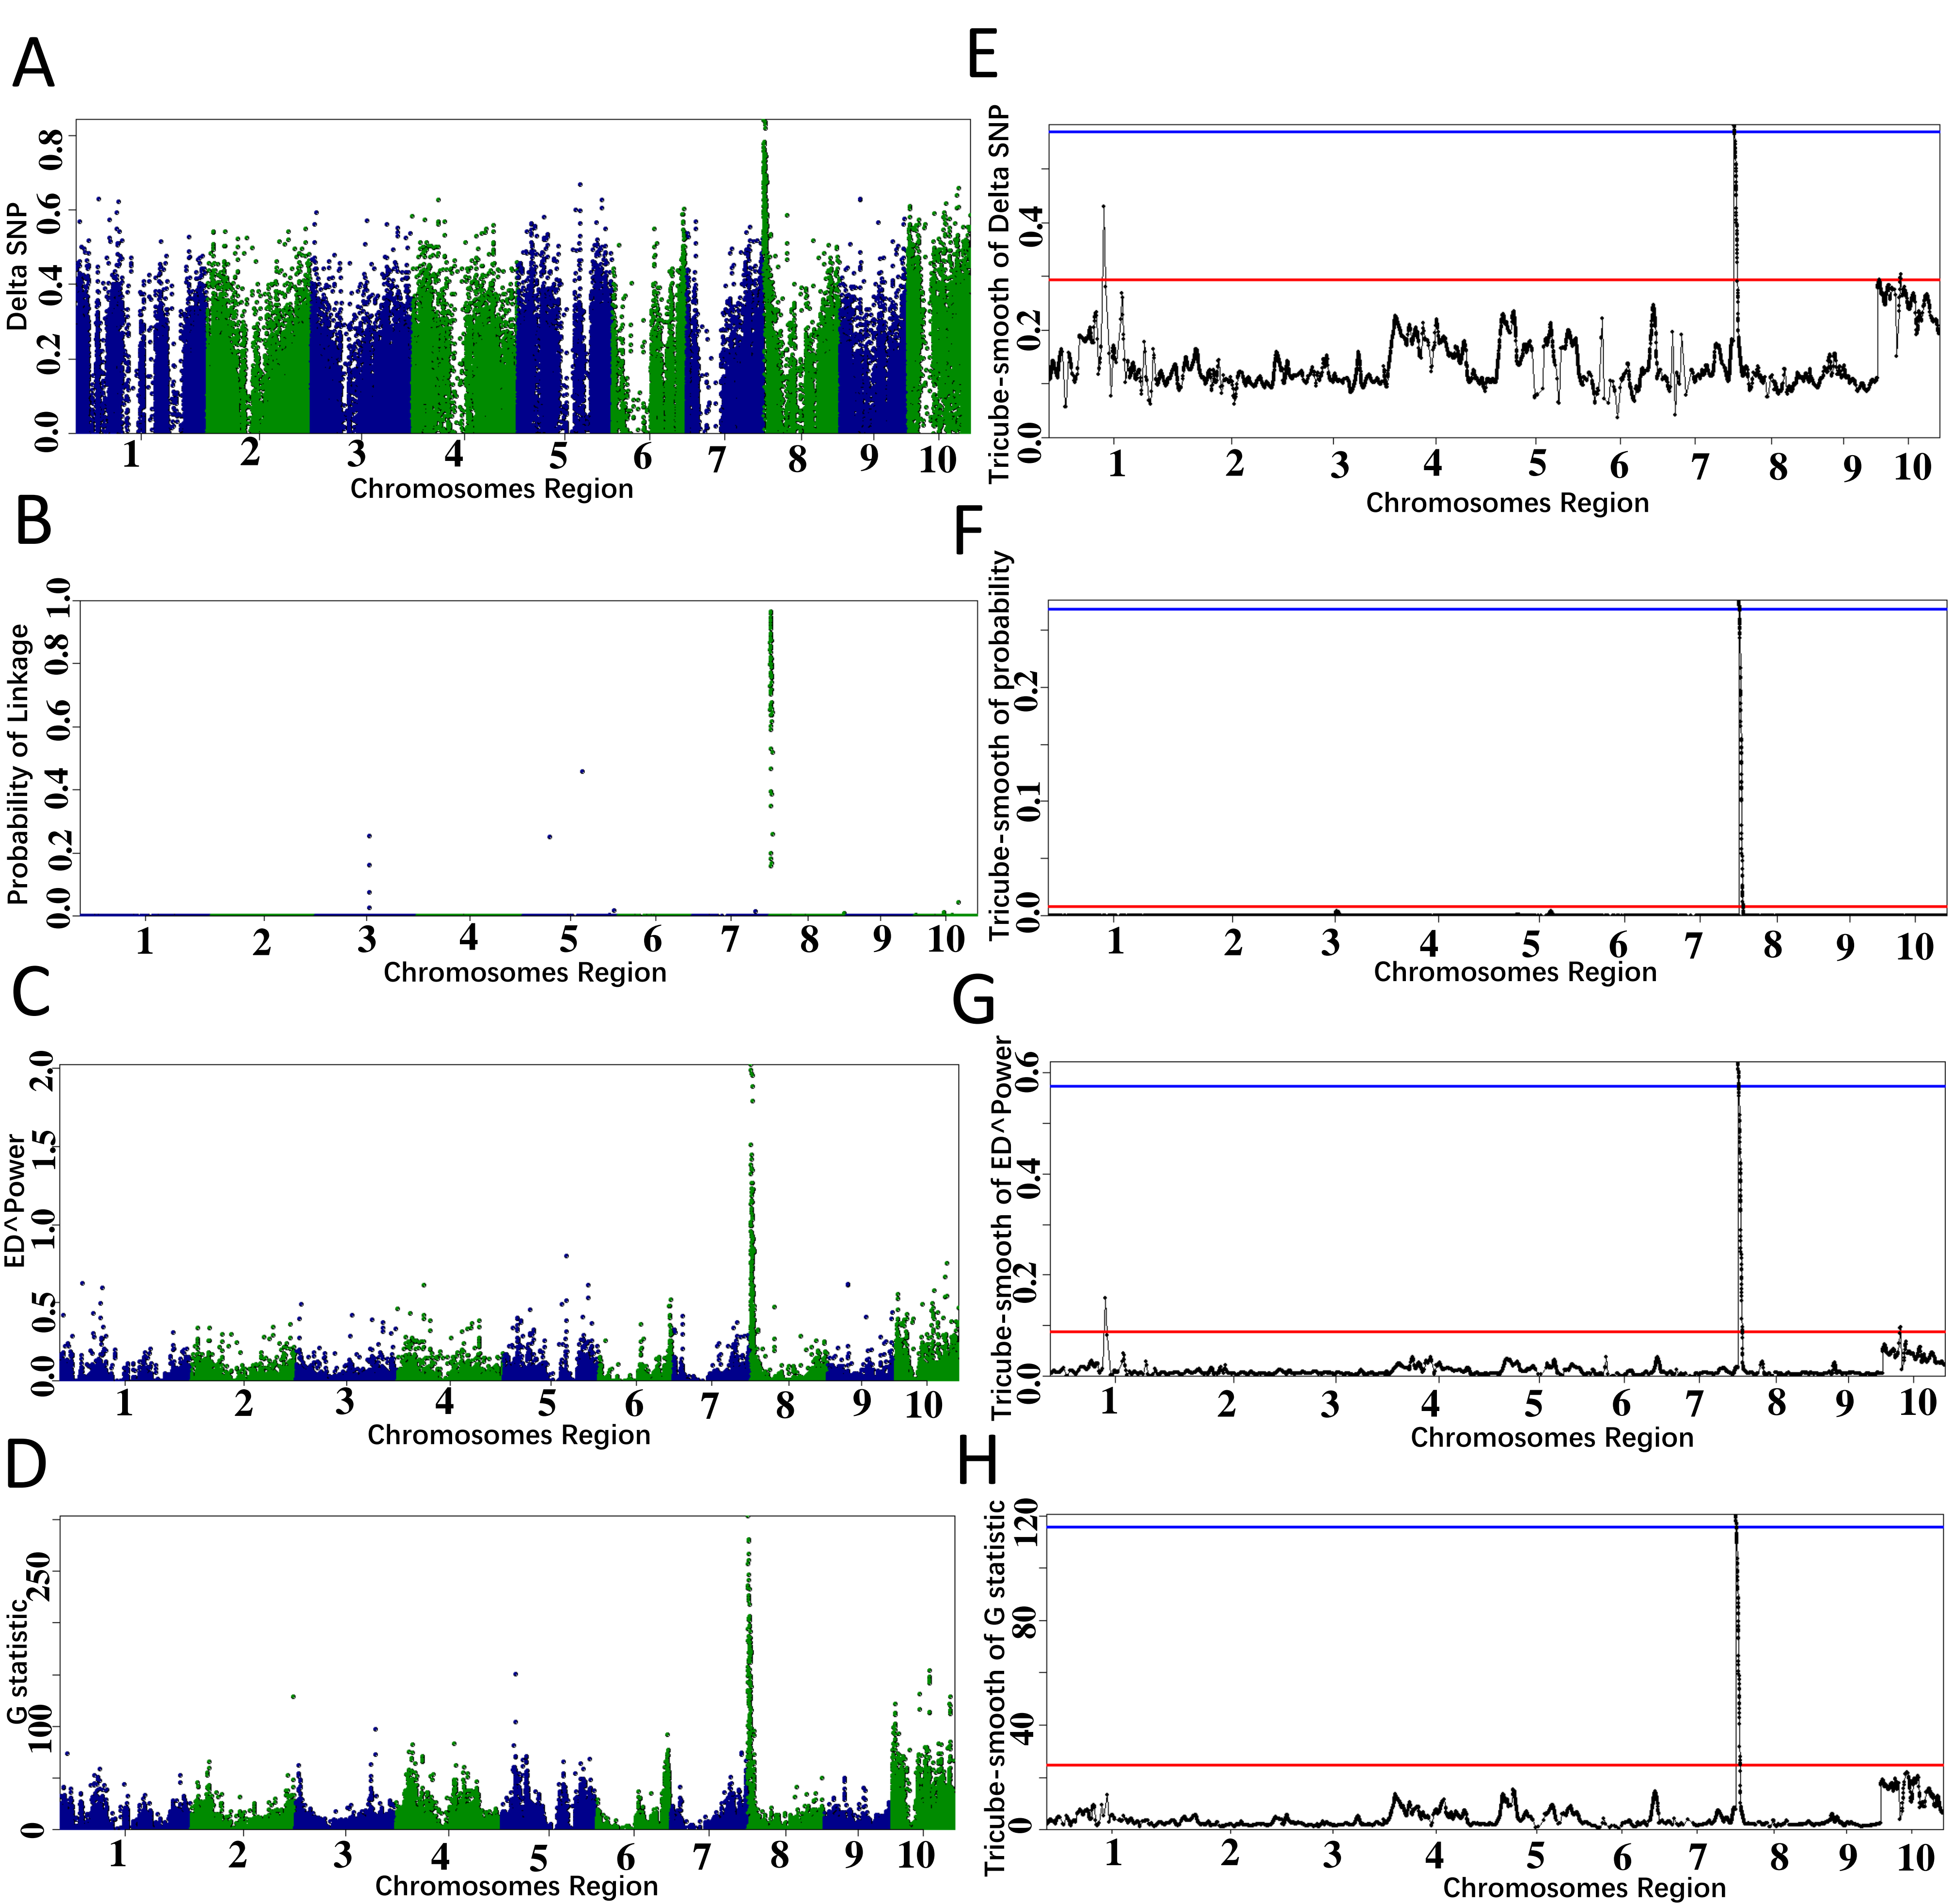

**Figure S4.** Positioning results by PNGseqR for maize small kernel mutant with version3 maize B73 reference genome. Plots produced by the “plot\_BSA()” function with a 5 Mb sliding window: (A–D). The scatter plots exported from the BSA results, the used algorithms are  $\Delta$ SNP, Bayes, ED, and G-test. (E–H) Tricube-smoothed values on the genome. The red line threshold shows the region containing SNPs whose tricube-smoothed values are higher than 99.5% of all values, and the blue line threshold shows the SNPs whose *P-values* are lower than 0.001 based on permutation test.
