# Supplementary material for: PNGSeqR: An R Package for Rapid Candidate Gene Selection through Pooled Next-Generation Sequencing
Source: Plants (Basel). 2022 Jul 11;11(14):1821. doi: 10.3390/plants11141821 (PMC9315718; doi:10.3390/plants11141821)
Supplement: Supplementary file 1 [file plants-11-01821-s001.zip]

Archive with 10 entries (10 files):
- FigS1-4.pdf
- Supplementary material.pdf
- Table S1.xlsx
- Table S2.xlsx
- Table S3.xlsx
- Table S4.xlsx
- Table S5.xlsx
- Table S6.xlsx
- Table S7.xlsx
- Table S8.xlsx
