# Supplementary material for: PNGSeqR: An R Package for Rapid Candidate Gene Selection through Pooled Next-Generation Sequencing
Source: Plants (Basel). 2022 Jul 11;11(14):1821. doi: 10.3390/plants11141821 (PMC9315718; doi:10.3390/plants11141821)
Supplement: Supplementary file 1 [file plants-11-01821-s001.zip › Table S1.xlsx]

## Sheet: Sheet1
Table S1. Description of PNGseqR functions and arguments.
Functiona	Parameterb	Descriptionc
vcf2table()		The function converts file in VCF format into a data frame
	file	The name of genotype file in VCF format from GATK SNP calling pipeline
	BulkA	The sample name of one bulk
	BulkB	The sample name of the other bulk
	chromlist	A string vector of the chromosomes to be used in the analysis, used to filter out unneeded contigs etc.
BSA_filter()		The function to filter SNPs based on read depth and quality of each bulk
	file	The data frame exported by vcf2table()
	Bulk.DP	The minimum total read depth for a SNP
	Bulk2.Ref	The minimum read depth of a reference SNP allele
	Bulk2.Alt	The minimum read depth of a alternative SNP allele
	Depth.diff	The maximum absolute differences between the read depths of the bulks
	min.GQ	The minimum Genotype Quality output by GATK
	verbose	Default value is “TRUE”. If the value is "TRUE", the number of SNPs filtered in each step will print
DeltaSNP()		The function to perform BSA analysis with ΔSNP algorithm
	file	The data frame exported by BSA_filter()
	Windowsize	A numeric value indicates the window size (in base pairs) containing SNPs subjected to calculating ΔSNP
	threshold	From 0 to 1, default value is “0.95”. A numeric threshold value to extract candidate region by fractile quantile
	pval	A numeric threshold value. Default value is “0.05”
Bayesian()		The function to perform BSA analysis with empirical bayesian algorithm
	file	The data frame exported by BSA_filter()
	Bulksize	The number of samples in each pool
	Genomelength	The total length of reference genome
	Windowsize	A numeric value indicates the window size (in base pairs) containing SNPs subjected to calculating empirical bayesian
	threshold	From 0 to 1, default value is “0.95”. A numeric threshold value to extract candidate region by fractile quantile
	pval	A numeric threshold value. Default value is “0.05”
ED()		The function to perform BSA analysis with Euclidean distance algorithm
	file	The data frame exported by BSA_filter()
	power	A numeric value indicates the power to raise ED. It was suggested to be 4~6
	Windowsize	A numeric value indicates the window size (in base pairs) containing SNPs subjected to calculating Euclidean distance
	threshold	From 0 to 1, default value is “0.95”. A numeric threshold value to extract candidate region by fractile quantile
	pval	A numeric threshold value, default value is “0.05”
Gprime()		The function to perform BSA analysis with G-test algorithm
	file	The data frame exported by BSA_filter()
	Windowsize	A numeric value indicates the window size (in base pairs) containing SNPs subjected to calculating G statistic
	threshold	From 0 to 1, default value is “0.95”. A numeric threshold value to extract candidate region by fractile quantile
	pval	A numeric threshold value. Default value is “0.05”
plot_BSA()		The function to output BSA analysis result into scatter and line plots
	file	The data frame exported by the BSA analysis functions
	chromlist	A string vector of the chromosome names used to plot line plots specific chromosomes, default value is “NULL”
	type	A character to indicate the selected algorithm, including "DeltaSNP","Bayesian","ED" and "Gprime"
	file.name	A character to name the output plot
	threshold	From 0 to 1, default value is “NULL”. The red threshold line displayed in the output plot
	pval	Default value is “NULL”. A numeric threshold value drawn in blue line in the output plot
DEG_analysis()		The function to perform differential expression analysis
	file	A data frame containing read count of each pool
	rep.num	A numeric value indicates the number of replications in differential expression analysis
	sig.level	A numeric value indicates the FDR threshold in differential expression analysis
	exp.fold	A numeric value indicates the log2FoldChange threshold in differential expression analysis
	plot	Default value is “TRUE”. If "TRUE", the volcano plot will be created
GO_analysis()		The function to perform GO analysis
	GO_term	A data frame contains at least two columns, one column is genes' name and the other column is the GO term
	DEG_id	A vector containing the names of the differential expression genes
	type	A character indicates the mode of GO analysis. There are four options: "CC" indicates cellular component; "BP" indicates biological process, "MF" indicates molecular function, and "all" indicates all three modes. The default is “all”
	algorithm	A character indicates the algorithm for GO analysis. Three options "classic","weight01", and "elim" indicate three different algorithms
	statistic	A character indicates two different significance test methods. Two options "fisher" and "ks" indicates two different methods
	top_num	A numeric value to indicate the number of significant GO terms
	plot	Default value is “TRUE”. If "TRUE", the acyclic, bubble, and histogram plots will be created
result_anno()		The function to extract genes fall in the candidate region and judge whether gene is differential expression
	BSA_data	A data frame contains three columns, including the chromosome name, the start and the end positions of the candidate regions
	gtf_data	The name of reference genome in GTF format
	DEG_data	A vector containing the names of differential expression genes,default is "NULL"
Note: a: The functions of PNGseqR; b: The parameters of each function in R package; c: The description for each function and its parameters.
