# Supplementary material for: PNGSeqR: An R Package for Rapid Candidate Gene Selection through Pooled Next-Generation Sequencing
Source: Plants (Basel). 2022 Jul 11;11(14):1821. doi: 10.3390/plants11141821 (PMC9315718; doi:10.3390/plants11141821)
Supplement: Supplementary file 1 [file plants-11-01821-s001.zip › Table S2.xlsx]

## Sheet: Sheet1
Table S2. The list of differential expression genes identified in example1
Genea	BaseMeanb	Log2FoldChangec	SEd	P-valuee	FDRf
ENSRNA049455358	248.848	0.996598	0.289087	0.000566024	0.00942485
ENSRNA049470937	54.4681	4.28764	0.739715	6.77798e-09	9.27736e-07
ENSRNA049472011	111.804	3.40533	0.481201	1.47582e-12	5.85113e-10
ENSRNA049472630	32.9287	2.21572	0.683589	0.00118984	0.0161896
ENSRNA049473133	12.0412	3.81556	1.29771	0.00327969	0.0344508
ENSRNA049473182	17.5086	2.89122	0.98871	0.00345306	0.0356322
ENSRNA049473192	10.5604	4.24811	1.47149	0.00389016	0.0386366
ENSRNA049473236	15.1283	3.69475	1.20131	0.00210079	0.0249266
ENSRNA049473346	27.8586	2.30897	0.776147	0.0029307	0.0318859
ENSRNA049473351	14.1527	3.65154	1.18315	0.00202668	0.024172
GRMZM5G827309	211.451	1.78835	0.295519	1.4346e-09	2.29088e-07
GRMZM5G861791	97.8547	1.1638	0.401623	0.0037586	0.0378688
GRMZM5G862955	295.508	1.02637	0.260093	7.94116e-05	0.00206933
GRMZM5G867512	280.278	1.2685	0.298936	2.20181e-05	0.000751195
GRMZM5G876913	71.8083	1.60485	0.489405	0.00104108	0.014732
GRMZM5G881135	372.665	0.860485	0.265249	0.00117837	0.0161001
GRMZM5G889036	167.598	0.912957	0.319227	0.00423779	0.0412217
Zm00001d000002	3971.39	-1.17428	0.139096	3.11367e-17	2.7538e-14
Zm00001d000009	627.287	-0.768142	0.200801	0.000130564	0.0030793
Zm00001d000011	70.6781	1.44253	0.456271	0.00156929	0.0199259
Zm00001d000021	4374.27	-0.529108	0.138245	0.000129543	0.00306149
Zm00001d000034	271.799	1.0645	0.261885	4.80835e-05	0.00139606
Zm00001d000072	70.9289	1.6687	0.536943	0.00188499	0.0228717
Zm00001d000080	696.545	-0.760611	0.188873	5.64689e-05	0.00157969
Zm00001d000123	539.777	-0.912578	0.20359	7.38001e-06	0.000311987
Zm00001d000133	665.291	0.830291	0.201075	3.63923e-05	0.00110401
Zm00001d000168	440.077	1.38569	0.263354	1.42733e-07	1.25273e-05
Zm00001d000178	1466.48	-0.81511	0.167759	1.18095e-06	7.17164e-05
Zm00001d000256	397.633	-1.35197	0.251711	7.82434e-08	7.59159e-06
Zm00001d000302	3665.6	-0.652868	0.144935	6.65149e-06	0.00028589
Zm00001d000305	222.638	1.04347	0.276535	0.00016105	0.00362363
Zm00001d000310	618.433	-0.612904	0.21984	0.00530413	0.0483618
Zm00001d000360	74.1312	2.19392	0.473263	3.55688e-06	0.000175516
Zm00001d000400	236.099	1.19967	0.29611	5.09053e-05	0.00146138
Zm00001d000418	8840.39	-0.790671	0.137004	7.8725e-09	1.03445e-06
Zm00001d000429	763.111	1.11282	0.195604	1.27675e-08	1.57e-06
Zm00001d000439	537.029	-0.574116	0.201011	0.00428828	0.0415896
Zm00001d000477	104.497	-3.64629	0.488266	8.1529e-14	3.90575e-11
Zm00001d000545	156.531	-1.09026	0.354842	0.00212259	0.0250688
Zm00001d000601	20.3266	-3.75601	0.984555	0.000136222	0.00318985
Zm00001d000604	82.1474	-1.80057	0.492551	0.000256586	0.00513243
Zm00001d001062	26.5884	-2.5046	0.768198	0.0011127	0.0154415
Zm00001d001286	252.09	-1.13478	0.306303	0.000211606	0.00443966
Zm00001d001373	12.2152	-4.64963	1.42932	0.00114179	0.0157136
Zm00001d001587	50.7747	1.68455	0.548057	0.00211438	0.0250361
Zm00001d001765	2259.39	-0.801027	0.152672	1.54842e-07	1.32858e-05
Zm00001d001790	640.307	-0.6217	0.210804	0.0031861	0.0337157
Zm00001d001800	95.8739	1.22577	0.431492	0.00450051	0.0430646
Zm00001d001806	169.176	-1.07849	0.359291	0.00268469	0.0298523
Zm00001d001831	418.437	1.34121	0.23812	1.77631e-08	2.04231e-06
Zm00001d001838	260.9	-1.26515	0.265917	1.95839e-06	0.000109414
Zm00001d001852	1570.7	0.944836	0.167374	1.65124e-08	1.95013e-06
Zm00001d001868	964.037	-0.529903	0.18006	0.00325122	0.0342473
Zm00001d001871	213.64	-0.894983	0.302948	0.00313432	0.0334508
Zm00001d001894	550.904	-0.67033	0.239172	0.00506741	0.046967
Zm00001d001941	100.251	-1.2019	0.385099	0.0018023	0.0221506
Zm00001d001959	282.693	0.717714	0.249404	0.00400571	0.0394481
Zm00001d001962	3191.48	-0.527711	0.141184	0.000185677	0.00402038
Zm00001d002004	1651.81	1.64271	0.47437	0.000534342	0.00898187
Zm00001d002006	798.912	0.868586	0.256454	0.000706857	0.0111406
Zm00001d002025	236.767	1.1402	0.332387	0.000602862	0.00988084
Zm00001d002026	114.054	1.21643	0.402534	0.0025116	0.0283665
Zm00001d002051	1134.8	-0.582827	0.187426	0.00187315	0.022778
Zm00001d002068	238.169	0.965419	0.300354	0.00130775	0.0173325
Zm00001d002080	2218.84	-0.717158	0.157742	5.4573e-06	0.000245929
Zm00001d002082	109.079	1.42144	0.38006	0.000183991	0.00398763
Zm00001d002085	200.886	1.0786	0.298579	0.000303329	0.00587125
Zm00001d002088	170.379	-1.5244	0.332764	4.62721e-06	0.000217592
Zm00001d002094	43.1412	2.8462	0.624586	5.19052e-06	0.000236818
Zm00001d002095	590.479	-0.76895	0.199463	0.00011568	0.00278832
Zm00001d002103	196.567	1.20359	0.303428	7.28923e-05	0.00193776
Zm00001d002122	2771.26	-0.930395	0.156462	2.74014e-09	4.14537e-07
Zm00001d002128	1685.64	-0.883704	0.157078	1.84542e-08	2.10077e-06
Zm00001d002137	160.879	1.1524	0.348397	0.000940607	0.0137068
Zm00001d002158	832.315	0.849842	0.181383	2.79488e-06	0.000144577
Zm00001d002169	1912.56	-0.517822	0.154189	0.000784059	0.0120116
Zm00001d002186	263.265	0.914716	0.272028	0.000772162	0.0118848
Zm00001d002234	177.37	1.28124	0.355906	0.000318287	0.00607386
Zm00001d002244	2728.54	-0.507505	0.147475	0.000578933	0.00958429
Zm00001d002254	52.162	2.66456	0.565159	2.42059e-06	0.00013005
Zm00001d002257	1554.6	-0.576047	0.164737	0.000470929	0.0081177
Zm00001d002260	2119.17	-0.930481	0.1665	2.29086e-08	2.53261e-06
Zm00001d002261	289.719	0.933489	0.27775	0.000776892	0.0119257
Zm00001d002288	237.239	1.29282	0.275255	2.64269e-06	0.000137797
Zm00001d002302	440.288	0.706428	0.227994	0.00194537	0.0234454
Zm00001d002324	1711.04	-0.98683	0.174187	1.46722e-08	1.77572e-06
Zm00001d002325	13110.6	-1.18692	0.131513	1.79547e-19	2.30464e-16
Zm00001d002346	329.772	1.02982	0.267189	0.000116072	0.00279483
Zm00001d002349	139.488	1.56404	0.416336	0.000172185	0.00380345
Zm00001d002360	1186.16	0.75615	0.216149	0.000468261	0.00808383
Zm00001d002370	15.9543	-3.36393	1.15997	0.00373158	0.0377675
Zm00001d002371	844.377	-0.664783	0.179255	0.000208412	0.00438867
Zm00001d002410	1046.96	1.17951	0.176947	2.63092e-11	7.85689e-09
Zm00001d002422	285.413	1.00551	0.279721	0.000324787	0.0061672
Zm00001d002441	14.3146	3.34698	1.19866	0.00523383	0.0479872
Zm00001d002447	126.147	1.41597	0.411536	0.000580195	0.00959826
Zm00001d002485	903.251	-0.606693	0.186886	0.00116908	0.0159922
Zm00001d002510	280.836	1.56601	0.276632	1.50509e-08	1.81202e-06
Zm00001d002511	611.807	-0.702385	0.196598	0.000353314	0.00654945
Zm00001d002521	186.873	-1.13808	0.299803	0.000146994	0.00337549
Zm00001d002522	299.142	-0.727762	0.245916	0.00308249	0.0330925
Zm00001d002538	599.786	-0.675998	0.205056	0.000978445	0.0141062
Zm00001d002540	300.055	0.758295	0.257795	0.00326661	0.0343726
Zm00001d002543	627.356	0.547725	0.196328	0.00527338	0.0481547
Zm00001d002562	30.3822	-1.99923	0.689789	0.00375172	0.0378381
Zm00001d002573	355.243	-1.27935	0.257173	6.53592e-07	4.39455e-05
Zm00001d002585	1457.02	-0.568107	0.159695	0.000374463	0.00685572
Zm00001d002601	3648.93	-0.524418	0.156467	0.000803387	0.0122263
Zm00001d002610	76.7546	1.36226	0.458144	0.00294485	0.031957
Zm00001d002615	794.403	-0.586102	0.183849	0.00143285	0.0185625
Zm00001d002654	3671.17	-0.871895	0.153414	1.32123e-08	1.61604e-06
Zm00001d002662	108.108	1.31937	0.425102	0.00191142	0.0231454
Zm00001d002690	292.94	0.772345	0.259691	0.00293857	0.0319107
Zm00001d002703	510.63	-0.881007	0.208163	2.31329e-05	0.000774295
Zm00001d002705	1653.55	-0.966648	0.157797	9.01744e-10	1.61997e-07
Zm00001d002708	726.236	-1.2862	0.189689	1.19706e-11	3.71978e-09
Zm00001d002711	160.57	1.00734	0.317343	0.00150208	0.0192855
Zm00001d002715	1789.71	-0.78467	0.154631	3.8862e-07	2.7839e-05
Zm00001d002726	355.679	1.22	0.278895	1.21766e-05	0.00046667
Zm00001d002822	255.716	-0.762269	0.269314	0.0046489	0.0440831
Zm00001d002833	80.6947	1.88714	0.457211	3.66726e-05	0.00110959
Zm00001d002835	869.642	-1.04381	0.18141	8.7217e-09	1.12042e-06
Zm00001d002842	1514.69	-0.987723	0.184453	8.56161e-08	8.16905e-06
Zm00001d002859	877.582	-0.885488	0.210351	2.55861e-05	0.000829834
Zm00001d002869	29.3943	2.35171	0.744008	0.00157302	0.0199374
Zm00001d002871	178.494	1.33915	0.347951	0.000118754	0.00285047
Zm00001d002874	252.664	-0.950972	0.270858	0.000446491	0.00780765
Zm00001d002880	971.083	-0.543873	0.189635	0.0041307	0.040385
Zm00001d002896	704.472	-0.542935	0.193552	0.00502999	0.0467106
Zm00001d002930	24.5102	-3.59529	0.873444	3.85122e-05	0.00115763
Zm00001d002952	578.523	1.02031	0.24111	2.31919e-05	0.000775141
Zm00001d002961	81.0971	1.27356	0.448438	0.00451149	0.043118
Zm00001d002967	190.97	0.951666	0.322635	0.00318115	0.0336944
Zm00001d002991	442.83	-1.01166	0.22364	6.07981e-06	0.000265285
Zm00001d003040	215.452	1.14643	0.286059	6.13189e-05	0.00167861
Zm00001d003049	580.219	-0.839769	0.204526	4.02709e-05	0.00119952
Zm00001d003083	898.495	-0.565714	0.175078	0.00123263	0.0166437
Zm00001d003086	119.851	-1.67947	0.373948	7.08318e-06	0.000302185
Zm00001d003087	1300.59	-0.756484	0.166403	5.46509e-06	0.000245929
Zm00001d003101	604.968	-0.576773	0.195895	0.00323697	0.0341284
Zm00001d003106	3732.49	-0.569208	0.141853	6.0042e-05	0.00164954
Zm00001d003112	694.287	-0.699019	0.189282	0.000221629	0.00460037
Zm00001d003164	719.833	2.3546	0.220358	1.19232e-26	3.91677e-23
Zm00001d003172	141.075	1.36929	0.425398	0.00128712	0.0171678
Zm00001d003191	52.6523	3.59259	0.658724	4.92882e-08	5.03725e-06
Zm00001d003198	1128.78	-0.684967	0.205307	0.000849017	0.0127436
Zm00001d003213	41.6336	1.90851	0.635231	0.00266081	0.0296728
Zm00001d003247	2481.27	0.630562	0.188654	0.000830477	0.0125448
Zm00001d003267	1123.76	0.524468	0.181821	0.00391999	0.0388535
Zm00001d003281	150.819	1.01341	0.364562	0.00543923	0.0490875
Zm00001d003284	614.033	-0.634224	0.207219	0.00220857	0.0258431
Zm00001d003288	2239.73	-0.645578	0.152016	2.16877e-05	0.000742126
Zm00001d003301	176.234	1.35512	0.327188	3.44707e-05	0.00105687
Zm00001d003347	648.647	-0.679375	0.198271	0.000611406	0.00996405
Zm00001d003369	1114.74	-0.541918	0.188845	0.0041093	0.0402099
Zm00001d003378	639.098	0.635537	0.190747	0.000862758	0.0129245
Zm00001d003380	176.898	0.934682	0.316448	0.00314021	0.0334664
Zm00001d003393	656.264	-0.545737	0.194907	0.00511054	0.0472524
Zm00001d003398	1248.72	-1.01575	0.178785	1.33576e-08	1.62517e-06
Zm00001d003401	8697.79	-0.729068	0.159877	5.11098e-06	0.000234118
Zm00001d003434	216.319	0.892315	0.292494	0.00228296	0.0263698
Zm00001d003438	310.243	-0.812014	0.243288	0.000844832	0.0126973
Zm00001d003447	60.2327	1.61208	0.49883	0.00123043	0.0166336
Zm00001d003457	104.985	1.22627	0.403611	0.00237956	0.0271824
Zm00001d003464	227.231	1.61725	0.318323	3.76353e-07	2.7067e-05
Zm00001d003502	1122.66	-0.761699	0.181155	2.61463e-05	0.00084443
Zm00001d003533	153.268	1.05416	0.365161	0.00389138	0.0386366
Zm00001d003590	772.221	-0.536046	0.18506	0.00377222	0.0379284
Zm00001d003645	85.8999	1.80465	0.43806	3.79446e-05	0.00114206
Zm00001d003659	835.096	0.575771	0.184356	0.00178923	0.0220018
Zm00001d003669	107.175	1.39558	0.390663	0.000353809	0.00655059
Zm00001d003677	2017.55	-0.774337	0.155464	6.3321e-07	4.26999e-05
Zm00001d003709	404.925	0.933733	0.237614	8.50816e-05	0.00217868
Zm00001d003725	429.717	0.874197	0.259622	0.000759381	0.0117194
Zm00001d003730	414.57	1.05442	0.235028	7.24459e-06	0.000307929
Zm00001d003742	52.6839	1.60584	0.552045	0.00362716	0.0370202
Zm00001d003750	752.694	-1.05596	0.238533	9.5589e-06	0.000388351
Zm00001d003757	96.5172	1.38515	0.470181	0.00321927	0.0339784
Zm00001d003773	595.463	-0.746513	0.228193	0.00107012	0.0149959
Zm00001d003776	54.3487	-2.12582	0.655028	0.00117292	0.0160352
Zm00001d003784	1936.57	-0.649869	0.161333	5.62245e-05	0.00157518
Zm00001d003800	140.203	1.14732	0.368053	0.00182531	0.0223538
Zm00001d003938	3069.06	1.23978	0.202323	8.91464e-10	1.61411e-07
Zm00001d003941	1278.2	-0.788225	0.180741	1.29425e-05	0.000489496
Zm00001d003945	9660.81	-0.566778	0.164849	0.000585676	0.00967502
Zm00001d004055	102.285	1.39806	0.418185	0.000828284	0.0125305
Zm00001d004095	67.5943	1.38297	0.46463	0.00291562	0.031818
Zm00001d004128	51.7352	-1.49404	0.53612	0.00532359	0.0484185
Zm00001d004138	359.803	1.30709	0.25938	4.67288e-07	3.276e-05
Zm00001d004139	1894.66	-0.648841	0.168607	0.000118973	0.00285273
Zm00001d004196	41.4627	1.87541	0.633895	0.00309091	0.0331379
Zm00001d004198	778.487	0.910047	0.207146	1.11659e-05	0.000436667
Zm00001d004208	52.3315	-1.8389	0.538181	0.000633417	0.0102573
Zm00001d004300	1131.15	-0.527532	0.164992	0.0013871	0.0180614
Zm00001d004413	1312.25	-1.34488	0.176744	2.75814e-14	1.40941e-11
Zm00001d004417	24.5434	2.80242	0.899642	0.00183924	0.0224659
Zm00001d004438	2403.9	-0.832958	0.178592	3.10064e-06	0.000156702
Zm00001d004494	62.1238	-1.4767	0.523977	0.00482842	0.0452075
Zm00001d004651	632.749	-0.679118	0.205195	0.000934209	0.0136308
Zm00001d004655	611.736	-0.737417	0.201277	0.000248603	0.00501459
Zm00001d004790	3111.02	-0.869386	0.141507	8.05894e-10	1.48499e-07
Zm00001d004817	418.152	1.24897	0.315687	7.60978e-05	0.00200904
Zm00001d004837	4824.2	-0.691665	0.142367	1.18375e-06	7.17164e-05
Zm00001d004867	170.825	1.4614	0.32884	8.82539e-06	0.000365657
Zm00001d005004	879.853	-0.767192	0.175308	1.20732e-05	0.000463478
Zm00001d005016	1372.81	0.964038	0.184424	1.72014e-07	1.4357e-05
Zm00001d005018	184.307	-0.894709	0.303817	0.00323065	0.0340774
Zm00001d005019	403.723	0.883026	0.269548	0.00105306	0.0148468
Zm00001d005028	360.774	-0.837271	0.229934	0.000271208	0.00536698
Zm00001d005059	650.129	0.582819	0.207227	0.00491632	0.0459183
Zm00001d005100	3735.31	-0.563655	0.153462	0.000239794	0.00490139
Zm00001d005114	100.548	2.04019	0.40638	5.15633e-07	3.57138e-05
Zm00001d005140	236.893	0.933318	0.268257	0.000502923	0.00854747
Zm00001d005159	818.547	0.981695	0.188413	1.88506e-07	1.5426e-05
Zm00001d005177	126.424	1.1786	0.380756	0.00196529	0.0236112
Zm00001d005252	202.474	-1.333	0.320711	3.23303e-05	0.00100059
Zm00001d005253	239.884	0.924817	0.288268	0.00133577	0.0176327
Zm00001d005276	13241.3	-0.589229	0.134319	1.15031e-05	0.000448328
Zm00001d005329	150.848	-1.06155	0.32575	0.00111884	0.0155046
Zm00001d005343	1692.53	-0.50176	0.176969	0.00457823	0.0435747
Zm00001d005356	777.121	-0.718581	0.229628	0.00175204	0.0216254
Zm00001d005370	68.7434	1.3606	0.486013	0.00511797	0.0473021
Zm00001d005392	17.7079	3.58962	1.12403	0.00140539	0.0182582
Zm00001d005393	310.952	0.777762	0.254709	0.00226168	0.0262398
Zm00001d005396	780.606	-0.645968	0.194414	0.000891685	0.0131848
Zm00001d005450	1266.64	-0.55853	0.16402	0.000661005	0.0106015
Zm00001d005451	1555.28	0.605241	0.187584	0.00125311	0.0168544
Zm00001d005460	1261.47	-1.11959	0.177504	2.83728e-10	6.3964e-08
Zm00001d005470	226.875	-1.72708	0.279692	6.61809e-10	1.27885e-07
Zm00001d005473	577.403	-0.684103	0.231057	0.00306888	0.033007
Zm00001d005502	2296.1	-0.764507	0.170683	7.49568e-06	0.000316263
Zm00001d005507	1061.66	-0.599763	0.167705	0.000348491	0.00647595
Zm00001d005542	1409.86	0.755206	0.169931	8.82263e-06	0.000365657
Zm00001d005558	1388.16	-0.617392	0.161971	0.00013799	0.00321927
Zm00001d005627	166.892	1.13404	0.318114	0.000364022	0.00671805
Zm00001d005636	3449.7	-0.743767	0.139968	1.07336e-07	9.95243e-06
Zm00001d005638	1667.03	-0.568802	0.159988	0.000377561	0.00689595
Zm00001d005650	481.074	-0.777482	0.216738	0.000334259	0.00628993
Zm00001d005654	1016.05	-0.889097	0.202042	1.07972e-05	0.00042514
Zm00001d005662	483.074	-0.687023	0.222014	0.00197145	0.0236482
Zm00001d005672	211.707	1.22778	0.31781	0.000111896	0.00271418
Zm00001d005696	94.8539	1.89428	0.411082	4.06516e-06	0.000195561
Zm00001d005776	39.5061	2.29748	0.652674	0.000431383	0.00761293
Zm00001d005779	2122.7	0.593739	0.168349	0.000420555	0.00749083
Zm00001d005793	439844	-0.683842	0.155385	1.07773e-05	0.000425086
Zm00001d005794	977.56	-0.576442	0.179881	0.00135266	0.0177552
Zm00001d005850	239.186	-1.28121	0.306732	2.95429e-05	0.000929329
Zm00001d005866	701.488	-0.703427	0.21393	0.00100859	0.0143905
Zm00001d005905	195.597	1.03399	0.299232	0.000549285	0.00917937
Zm00001d005944	368.512	-0.651661	0.227736	0.00421672	0.0410688
Zm00001d005958	1085.53	-0.511032	0.168771	0.00246212	0.0279588
Zm00001d005981	550.579	-0.624202	0.217003	0.00402163	0.0395709
Zm00001d005986	194.971	1.23436	0.381543	0.00121563	0.0164825
Zm00001d005996	63.5076	1.43782	0.498057	0.00389108	0.0386366
Zm00001d006010	460.792	1.12016	0.245446	5.02451e-06	0.00023154
Zm00001d006011	581.583	-0.644995	0.19859	0.00116272	0.0159242
Zm00001d006029	197.14	-1.00651	0.321201	0.00172685	0.0213719
Zm00001d006041	2681.84	-0.646485	0.146	9.51158e-06	0.000387799
Zm00001d006079	356.131	-0.679936	0.234357	0.00371635	0.0376464
Zm00001d006085	1523.74	-0.581308	0.156488	0.000203429	0.00431139
Zm00001d006137	10.554	6.76284	1.82833	0.00021653	0.00451414
Zm00001d006160	2798.82	-0.558805	0.148388	0.000165988	0.00371294
Zm00001d006193	145.377	1.07741	0.346277	0.00186187	0.0226768
Zm00001d006212	159.53	-1.34397	0.327657	4.10048e-05	0.00121665
Zm00001d006213	3375.11	-0.508292	0.149854	0.000694053	0.0110143
Zm00001d006220	4775.32	-1.04166	0.168933	6.9979e-10	1.32989e-07
Zm00001d006288	101.578	1.25449	0.435554	0.00397415	0.0392213
Zm00001d006295	711.417	-0.680523	0.22222	0.0021958	0.0257512
Zm00001d006306	1994.33	-0.957852	0.162567	3.81432e-09	5.65874e-07
Zm00001d006319	2247.11	-0.957868	0.150877	2.17214e-10	5.09677e-08
Zm00001d006364	1006.82	1.39659	0.254521	4.08495e-08	4.2892e-06
Zm00001d006443	131.053	1.21442	0.374694	0.00119068	0.0161914
Zm00001d006476	586.154	0.78041	0.229213	0.000662264	0.010605
Zm00001d006511	181.525	0.877217	0.298097	0.00325341	0.0342547
Zm00001d006573	3632.52	-0.822822	0.148619	3.08659e-08	3.31664e-06
Zm00001d006580	552.803	-0.607484	0.203993	0.00290163	0.0317124
Zm00001d006597	566.409	-0.59033	0.20278	0.0036007	0.0368503
Zm00001d006604	141.117	1.05293	0.345329	0.00229563	0.0264469
Zm00001d006605	902.497	-0.546091	0.17658	0.00198417	0.023764
Zm00001d006623	167.211	1.30171	0.323665	5.77587e-05	0.00160406
Zm00001d006630	104.331	1.57119	0.392669	6.29892e-05	0.00172023
Zm00001d006710	993.808	-0.625861	0.182387	0.000600265	0.00985935
Zm00001d006753	1182.02	0.889507	0.220705	5.57045e-05	0.00156784
Zm00001d006763	251.876	-0.846608	0.260535	0.00115606	0.0158519
Zm00001d006788	168.174	1.08152	0.310906	0.000503998	0.00855308
Zm00001d006796	2317.95	0.884644	0.210973	2.751e-05	0.000878599
Zm00001d006864	2207.13	-0.834474	0.168151	6.95347e-07	4.59469e-05
Zm00001d006905	150.464	1.33649	0.354094	0.000160402	0.00361611
Zm00001d006916	477.475	-0.611208	0.219588	0.00537872	0.0486895
Zm00001d006922	524.857	1.13907	0.222766	3.16526e-07	2.39701e-05
Zm00001d007034	1105.53	0.603231	0.184662	0.00108821	0.0152118
Zm00001d007042	1211.51	-0.505948	0.169328	0.00280837	0.0309729
Zm00001d007048	950.385	-0.514762	0.176089	0.00346332	0.0357125
Zm00001d007097	435.449	-0.611542	0.215267	0.00449925	0.0430646
Zm00001d007153	10145.5	-0.883442	0.147931	2.3437e-09	3.63627e-07
Zm00001d007169	537.78	-1.24462	0.203036	8.78696e-10	1.60362e-07
Zm00001d007258	211.727	-0.981007	0.293232	0.000821351	0.0124502
Zm00001d007259	234.652	-0.924674	0.282365	0.00105755	0.0148919
Zm00001d007299	10791.4	1.53236	0.500686	0.0022095	0.0258431
Zm00001d007383	1667.66	0.586708	0.197135	0.00291862	0.031818
Zm00001d007464	17.6127	4.37821	1.21448	0.000312127	0.00597616
Zm00001d007571	234.392	0.759013	0.272374	0.00532555	0.0484185
Zm00001d007597	724.655	-0.647963	0.227654	0.00442359	0.0425965
Zm00001d007698	2970.26	-0.654871	0.148867	1.08731e-05	0.000427397
Zm00001d007766	44.8735	2.59848	0.609853	2.03661e-05	0.000705299
Zm00001d007791	39.2934	-1.72801	0.60582	0.00433964	0.0419639
Zm00001d007825	268.684	-1.01525	0.267922	0.000151041	0.00344277
Zm00001d007870	2146.06	-0.575994	0.153209	0.000170236	0.00377127
Zm00001d007871	296.966	1.33651	0.252911	1.26055e-07	1.1235e-05
Zm00001d007902	1342.35	-0.542929	0.164597	0.000971872	0.0140696
Zm00001d007978	519.179	1.03144	0.224622	4.39287e-06	0.000208529
Zm00001d008040	82.8691	-1.88061	0.466336	5.51285e-05	0.00155544
Zm00001d008179	75.7219	-1.65524	0.451149	0.000243559	0.00495633
Zm00001d008181	619.15	-1.11261	0.198739	2.16402e-08	2.4274e-06
Zm00001d008196	12.0814	-7.13228	1.79328	6.97271e-05	0.00186439
Zm00001d008198	21.8659	2.42856	0.839542	0.00381929	0.0382883
Zm00001d008209	60.7127	2.66745	0.539819	7.75706e-07	4.95482e-05
Zm00001d008211	256.231	-3.75624	0.87656	1.82571e-05	0.000647875
Zm00001d008212	101.91	-1.42612	0.407166	0.00046083	0.00800228
Zm00001d008229	18.8106	-2.65354	0.918799	0.00387632	0.038587
Zm00001d008233	735.699	-0.69729	0.187873	0.00020603	0.00434648
Zm00001d008241	742.831	0.964663	0.263256	0.000247966	0.00500612
Zm00001d008249	768.686	0.837826	0.219984	0.000139767	0.00325298
Zm00001d008256	947.657	-1.58962	0.1976	8.65033e-16	6.63048e-13
Zm00001d008257	1210.9	-0.581935	0.173113	0.000774936	0.0119115
Zm00001d008269	81.1964	-1.80918	0.437222	3.50488e-05	0.00107188
Zm00001d008277	27.9614	-4.51571	0.956856	2.36632e-06	0.000128032
Zm00001d008303	281.006	-2.93385	0.275458	1.72909e-26	4.97005e-23
Zm00001d008321	217.553	0.979301	0.346601	0.00472153	0.0445697
Zm00001d008329	24.8715	-4.06461	0.915208	8.94631e-06	0.000368675
Zm00001d008340	246.962	-1.56422	0.27728	1.68766e-08	1.95013e-06
Zm00001d008354	614.706	-0.563917	0.193021	0.00348323	0.0358696
Zm00001d008369	1306.6	-0.824774	0.167967	9.09197e-07	5.69673e-05
Zm00001d008386	336.139	-0.877168	0.234086	0.00017882	0.00390871
Zm00001d008403	16699.8	-1.78842	0.135046	4.94792e-40	5.68888e-36
Zm00001d008439	1336.23	-0.519455	0.159634	0.00113777	0.0156758
Zm00001d008446	755.069	0.870165	0.205778	2.35091e-05	0.000781202
Zm00001d008453	141.696	1.01196	0.363291	0.00534394	0.0484576
Zm00001d008456	223.002	-1.37345	0.282312	1.14445e-06	7.01532e-05
Zm00001d008495	289.677	1.14541	0.275646	3.24763e-05	0.00100375
Zm00001d008500	744.305	-0.757159	0.195377	0.000106457	0.00260055
Zm00001d008517	334.14	-0.940617	0.28025	0.000789775	0.012067
Zm00001d008520	1826.7	-0.520536	0.169078	0.00207928	0.0247096
Zm00001d008530	197.704	1.03494	0.331726	0.00180934	0.0222254
Zm00001d008565	378.162	0.869079	0.239046	0.00027731	0.00545487
Zm00001d008567	3193.11	-0.585847	0.167361	0.000464403	0.00803927
Zm00001d008591	2816.33	-0.637193	0.14453	1.03981e-05	0.000413196
Zm00001d008602	246.827	-0.796625	0.266016	0.00274756	0.0304336
Zm00001d008610	939.162	-0.781283	0.185247	2.4699e-05	0.000809051
Zm00001d008617	1759.32	-0.581085	0.161011	0.000307396	0.00591017
Zm00001d008624	924.761	-1.10096	0.192929	1.15284e-08	1.4486e-06
Zm00001d008651	1758.92	-0.764001	0.176029	1.42354e-05	0.000527121
Zm00001d008663	520.967	-0.953997	0.273833	0.00049424	0.0084263
Zm00001d008665	180.504	0.884632	0.315382	0.00503231	0.0467106
Zm00001d008691	338.36	-0.904428	0.23548	0.000122642	0.00292548
Zm00001d008715	82.7309	1.62888	0.500435	0.00113423	0.0156552
Zm00001d008721	23.2301	2.96215	0.850262	0.000494328	0.0084263
Zm00001d008727	315.228	1.07758	0.286513	0.000169234	0.00375995
Zm00001d008777	2015.52	-0.570145	0.151875	0.000174003	0.00383256
Zm00001d008779	154.444	0.932469	0.331061	0.00485342	0.0453676
Zm00001d008841	2902.89	0.616593	0.182811	0.000743974	0.0115906
Zm00001d008846	7599.01	-0.859232	0.134712	1.79085e-10	4.28965e-08
Zm00001d008874	268.404	-0.722777	0.256576	0.00484732	0.045329
Zm00001d008893	977.561	-0.514976	0.170531	0.0025291	0.0284942
Zm00001d008901	24.1178	2.54729	0.880568	0.00381853	0.0382883
Zm00001d008903	103.218	1.2479	0.404689	0.00204511	0.0243665
Zm00001d008929	250.312	1.45838	0.326052	7.71863e-06	0.000324479
Zm00001d008976	284.834	1.06751	0.285311	0.000182878	0.00397099
Zm00001d008983	390.495	1.1182	0.263754	2.23952e-05	0.000758436
Zm00001d008992	932.076	-0.679972	0.181538	0.000179956	0.00392236
Zm00001d009059	248.633	-0.835532	0.274007	0.00229367	0.0264375
Zm00001d009063	100.913	-1.67991	0.415686	5.31588e-05	0.00151473
Zm00001d009077	1176.56	-0.539655	0.180981	0.0028653	0.03139
Zm00001d009146	738.942	0.654169	0.212236	0.00205432	0.0244509
Zm00001d009150	796.11	-0.656361	0.187901	0.000477419	0.00820497
Zm00001d009248	561.532	0.630862	0.217557	0.00373451	0.0377805
Zm00001d009315	94.6103	1.15831	0.415095	0.00526314	0.0481216
Zm00001d009324	514.616	-0.662667	0.206465	0.00132928	0.017557
Zm00001d009431	29687.5	-1.10613	0.141634	5.72724e-15	3.21214e-12
Zm00001d009439	528.008	-0.870325	0.216192	5.68029e-05	0.00158517
Zm00001d009472	104.761	1.07503	0.377983	0.00445338	0.0427796
Zm00001d009493	70.8271	1.58037	0.517551	0.00226144	0.0262398
Zm00001d009494	39.299	4.60449	0.885943	2.02223e-07	1.63946e-05
Zm00001d009554	1032.79	0.502864	0.168772	0.00288672	0.0315644
Zm00001d009578	948.275	-0.672955	0.181774	0.00021377	0.00448063
Zm00001d009617	971.409	-0.643943	0.179406	0.000331555	0.00626467
Zm00001d009638	11251.6	-0.661221	0.130098	3.72542e-07	2.6939e-05
Zm00001d009648	541.295	1.37562	0.243842	1.68646e-08	1.95013e-06
Zm00001d009674	77.4452	1.44498	0.459081	0.00164643	0.0206207
Zm00001d009700	1358.61	-0.505496	0.170909	0.00309954	0.033197
Zm00001d009718	402.95	1.19197	0.266518	7.73554e-06	0.000324596
Zm00001d009726	94.5512	1.31742	0.447931	0.00327037	0.034386
Zm00001d009765	297.983	1.52871	0.287406	1.04341e-07	9.75337e-06
Zm00001d009771	1010.29	-0.575064	0.181807	0.00156128	0.0198352
Zm00001d009783	2303.98	-0.772782	0.17368	8.6087e-06	0.000357969
Zm00001d009801	117.72	-1.46836	0.412418	0.000370336	0.00680183
Zm00001d009814	18.3127	2.75017	0.948764	0.0037473	0.0378101
Zm00001d009837	842.053	-0.657568	0.187042	0.000438728	0.00770118
Zm00001d009858	1015.88	0.548491	0.178902	0.00217033	0.0255277
Zm00001d009888	432.073	0.837228	0.247366	0.000712884	0.0112049
Zm00001d009902	1259.08	-0.726135	0.17583	3.63133e-05	0.00110313
Zm00001d009908	933.832	0.817718	0.193931	2.48068e-05	0.000809951
Zm00001d009923	41.3428	2.16696	0.640144	0.000711476	0.0111981
Zm00001d009925	74.5031	-2.87271	0.606018	2.13405e-06	0.000117963
Zm00001d009940	707.679	-0.776174	0.196625	7.89777e-05	0.0020614
Zm00001d009983	456.437	-0.79208	0.212579	0.000194504	0.00416215
Zm00001d009985	92.0866	1.60398	0.547164	0.00337392	0.0351214
Zm00001d010025	324.65	-1.15162	0.251655	4.73503e-06	0.000220856
Zm00001d010031	2527.3	-1.20629	0.188657	1.61507e-10	3.90932e-08
Zm00001d010066	571.742	-0.688255	0.210811	0.0010954	0.0152804
Zm00001d010120	682.677	-0.652537	0.211233	0.00200714	0.0239868
Zm00001d010143	139.208	-1.08899	0.363483	0.00273559	0.0303449
Zm00001d010159	3362.4	-0.613179	0.141905	1.55288e-05	0.000565008
Zm00001d010171	670.828	0.949524	0.256064	0.000208777	0.00439233
Zm00001d010180	252.78	1.20436	0.288087	2.90829e-05	0.000919891
Zm00001d010193	422.717	0.871312	0.276254	0.00161038	0.0202575
Zm00001d010201	248.005	0.852305	0.277642	0.00214207	0.025247
Zm00001d010213	670.412	-0.831532	0.192928	1.63209e-05	0.000590896
Zm00001d010218	37.8899	2.28055	0.695117	0.0010351	0.0146656
Zm00001d010230	249.913	-0.945676	0.281545	0.00078258	0.011997
Zm00001d010236	491.567	0.924926	0.228403	5.13192e-05	0.00147143
Zm00001d010275	100.931	2.06002	0.433069	1.96699e-06	0.000109518
Zm00001d010279	304.179	-0.88342	0.250597	0.000423056	0.00752126
Zm00001d010282	2510.98	-0.614911	0.160517	0.000127724	0.00303097
Zm00001d010294	405.239	-0.77701	0.231384	0.000784808	0.0120151
Zm00001d010304	48.0412	1.8025	0.597484	0.00255448	0.0287588
Zm00001d010321	56396.7	-0.691293	0.183871	0.000170135	0.00377127
Zm00001d010325	694.935	-0.769219	0.189426	4.89068e-05	0.00141546
Zm00001d010368	678.629	-0.984619	0.204523	1.47779e-06	8.58128e-05
Zm00001d010371	13750.9	-0.670055	0.181785	0.000227831	0.00470285
Zm00001d010385	32.0755	2.06918	0.729462	0.00455993	0.0434684
Zm00001d010411	415.23	1.17421	0.258845	5.72342e-06	0.000254074
Zm00001d010422	20.942	3.62411	0.965952	0.000175529	0.00385511
Zm00001d010425	6159.23	-0.524175	0.152949	0.000610022	0.00996405
Zm00001d010443	399.378	-1.04712	0.227124	4.01999e-06	0.000194201
Zm00001d010445	1544.51	-0.809144	0.202897	6.66484e-05	0.0017988
Zm00001d010452	154.676	-1.04372	0.319525	0.001089	0.0152136
Zm00001d010462	35.1502	1.94832	0.685561	0.00448403	0.0429805
Zm00001d010525	249.547	1.75007	0.282789	6.07012e-10	1.21376e-07
Zm00001d010527	102.101	1.19307	0.41002	0.0036167	0.0369956
Zm00001d010572	1226.48	-0.907019	0.173119	1.61209e-07	1.37296e-05
Zm00001d010575	502.141	0.707726	0.215272	0.00101047	0.0144053
Zm00001d010586	228.933	1.36363	0.40169	0.000686958	0.0109168
Zm00001d010588	922.621	-0.916361	0.230111	6.82635e-05	0.00183378
Zm00001d010625	190.949	1.3241	0.355981	0.000199557	0.00424496
Zm00001d010680	11.292	4.37902	1.48916	0.00327578	0.0344271
Zm00001d010720	2288.76	-0.740096	0.166615	8.91423e-06	0.000368674
Zm00001d010742	33.1102	-2.09499	0.708757	0.00311791	0.0333567
Zm00001d010785	117.377	1.53426	0.408503	0.00017279	0.0038095
Zm00001d010792	94.1795	1.29026	0.406445	0.00150096	0.0192819
Zm00001d010852	2028.34	-0.795476	0.151391	1.48479e-07	1.28329e-05
Zm00001d010854	118.674	-1.12959	0.404532	0.00523273	0.0479872
Zm00001d010855	7004.05	-0.661567	0.186813	0.000398106	0.00719123
Zm00001d010920	2564.84	1.12787	0.198019	1.22818e-08	1.5266e-06
Zm00001d010997	447.255	-0.72311	0.215975	0.000813614	0.0123411
Zm00001d011013	420.318	0.822488	0.21938	0.000177435	0.00388583
Zm00001d011034	2249.4	-0.643258	0.160079	5.85975e-05	0.00162148
Zm00001d011051	1021.83	0.693321	0.17207	5.59426e-05	0.00157205
Zm00001d011060	734.331	0.758285	0.20202	0.000174374	0.0038334
Zm00001d011061	312.115	0.744734	0.251664	0.00308403	0.0330925
Zm00001d011064	11.5416	4.35309	1.46202	0.00290662	0.0317519
Zm00001d011066	327.676	-0.80012	0.245229	0.00110337	0.0153491
Zm00001d011080	33550.6	-0.661549	0.181935	0.000276702	0.00545487
Zm00001d011099	124.328	1.49647	0.382631	9.19157e-05	0.00232114
Zm00001d011103	1146.72	-0.533203	0.175038	0.00231744	0.0265784
Zm00001d011113	2382.79	0.60365	0.147906	4.47812e-05	0.00131178
Zm00001d011130	1072.89	0.992038	0.193708	3.03407e-07	2.31945e-05
Zm00001d011138	2053.55	-0.567995	0.167054	0.000673698	0.0107506
Zm00001d011162	2926.56	-0.595268	0.159726	0.00019392	0.00416215
Zm00001d011185	1738.18	-0.688007	0.174796	8.28296e-05	0.00212812
Zm00001d011208	260.434	1.45937	0.341751	1.95238e-05	0.000679199
Zm00001d011210	99.9271	1.53684	0.41618	0.000221866	0.00460037
Zm00001d011211	67.7551	1.35579	0.473783	0.00421467	0.0410662
Zm00001d011213	3949.98	-0.569924	0.147074	0.000106586	0.00260055
Zm00001d011258	253.687	1.20749	0.28506	2.27607e-05	0.000767423
Zm00001d011275	203.58	0.862226	0.294098	0.00337039	0.0351032
Zm00001d011283	289.335	0.804324	0.284528	0.00470049	0.0444335
Zm00001d011352	1340.47	-0.724545	0.174114	3.16396e-05	0.00098318
Zm00001d011353	1313.86	-0.614466	0.191546	0.00133697	0.0176384
Zm00001d011363	590.709	1.1716	0.216217	6.0064e-08	5.95333e-06
Zm00001d011468	101.056	-1.36252	0.390286	0.000481066	0.00826082
Zm00001d011471	370.543	0.824857	0.249125	0.000929603	0.0135722
Zm00001d011492	534.229	-0.586944	0.202558	0.00375968	0.0378688
Zm00001d011504	3367.07	-0.802695	0.157655	3.55291e-07	2.58542e-05
Zm00001d011512	875.87	-0.90262	0.203612	9.2917e-06	0.000380183
Zm00001d011536	1753.5	-0.812816	0.168172	1.34322e-06	7.87941e-05
Zm00001d011563	3122.67	-1.03445	0.190778	5.8838e-08	5.85706e-06
Zm00001d011581	1901.63	0.545028	0.163156	0.000836185	0.0126003
Zm00001d011615	114.773	1.15541	0.404068	0.00424376	0.0412448
Zm00001d011637	17.1304	3.24357	1.11872	0.00373941	0.0377962
Zm00001d011712	235.181	1.31611	0.297418	9.63915e-06	0.000389274
Zm00001d011755	1126.22	0.947126	0.228411	3.3746e-05	0.00103742
Zm00001d011765	78.018	1.25519	0.437053	0.00407966	0.0399967
Zm00001d011767	674.158	-0.694166	0.187897	0.000220406	0.00458249
Zm00001d011770	898.192	-0.906938	0.183157	7.35716e-07	4.77903e-05
Zm00001d011781	95.7398	3.31206	0.476136	3.49779e-12	1.27669e-09
Zm00001d011786	773.956	0.631832	0.184543	0.000617586	0.0100413
Zm00001d011832	1462.23	-0.998467	0.177326	1.79495e-08	2.05348e-06
Zm00001d011877	283.316	-0.781554	0.254338	0.00211992	0.025054
Zm00001d011895	108.095	1.90645	0.407923	2.96032e-06	0.000150937
Zm00001d011904	970.998	-0.737361	0.186862	7.94615e-05	0.00206933
Zm00001d011919	3963.61	-1.04638	0.17101	9.42634e-10	1.6803e-07
Zm00001d011928	54.6154	1.49243	0.526751	0.0046075	0.0437988
Zm00001d011975	1817.83	-0.693781	0.165205	2.67483e-05	0.000861451
Zm00001d011984	536.041	-0.693797	0.226188	0.00215966	0.0254282
Zm00001d011994	1433.86	-0.52791	0.160875	0.00103258	0.0146388
Zm00001d012010	813.623	-0.61246	0.21793	0.00494882	0.0461281
Zm00001d012043	103.819	1.4895	0.391718	0.000143253	0.00331731
Zm00001d012044	4454.72	-0.55842	0.147756	0.000157252	0.00356256
Zm00001d012068	2015.28	0.689217	0.176128	9.10915e-05	0.00230435
Zm00001d012086	629.012	0.734845	0.194212	0.000154494	0.00351047
Zm00001d012142	115.439	-1.11763	0.369097	0.0024617	0.0279588
Zm00001d012198	672.561	-0.722568	0.20205	0.000348651	0.00647595
Zm00001d012199	1340.17	-0.751059	0.188442	6.73012e-05	0.00181429
Zm00001d012206	374.031	-0.920679	0.259856	0.000395558	0.00715646
Zm00001d012241	175.196	-1.6031	0.331307	1.30679e-06	7.74476e-05
Zm00001d012258	318.832	0.883999	0.271661	0.00113773	0.0156758
Zm00001d012263	391.976	-0.923383	0.234805	8.4046e-05	0.00215456
Zm00001d012277	744.396	-0.974571	0.190602	3.16891e-07	2.39701e-05
Zm00001d012313	252.849	-0.967379	0.291896	0.000919305	0.0134475
Zm00001d012320	47.2104	1.78954	0.574499	0.00183967	0.0224659
Zm00001d012321	1088.09	-0.66345	0.199618	0.000888617	0.0131673
Zm00001d012335	30.7751	2.1144	0.698668	0.00247539	0.0280679
Zm00001d012336	841.565	-0.596384	0.181203	0.000997442	0.0142727
Zm00001d012338	751.252	-0.586495	0.196655	0.00286037	0.0313637
Zm00001d012393	413.169	-0.703721	0.226881	0.00192398	0.0232485
Zm00001d012395	609.28	-0.669739	0.211154	0.00151497	0.0194184
Zm00001d012401	170.712	1.06796	0.339244	0.00164362	0.0205967
Zm00001d012407	748.718	-1.64371	0.239747	7.08182e-12	2.3948e-09
Zm00001d012415	423.485	0.761635	0.24199	0.00164743	0.020622
Zm00001d012447	3100.35	-0.97649	0.160094	1.06425e-09	1.84003e-07
Zm00001d012475	614.746	-1.02417	0.203886	5.0809e-07	3.52977e-05
Zm00001d012480	21.9544	2.70647	0.893199	0.00244487	0.0278179
Zm00001d012539	228.09	1.03915	0.298198	0.000492544	0.0084146
Zm00001d012546	549.997	-0.63593	0.219532	0.00377053	0.0379279
Zm00001d012556	2683.75	0.690497	0.152538	5.99032e-06	0.0002641
Zm00001d012560	143.977	1.27714	0.350234	0.000265816	0.00527845
Zm00001d012561	357.671	0.816341	0.252506	0.00122515	0.0165719
Zm00001d012562	208.022	0.841209	0.297444	0.0046821	0.0443248
Zm00001d012611	91.0869	1.36903	0.409611	0.000830986	0.0125448
Zm00001d012614	289.183	1.30268	0.311735	2.93035e-05	0.000923061
Zm00001d012652	1484.47	-0.569798	0.157064	0.000285854	0.00557921
Zm00001d012672	1992.51	-0.590939	0.172308	0.000604573	0.00988774
Zm00001d012707	12.8709	3.50596	1.26072	0.00542032	0.0489746
Zm00001d012718	214.303	0.992878	0.294668	0.000753102	0.0116617
Zm00001d012728	768.374	-0.605647	0.190824	0.00150429	0.0193031
Zm00001d012743	611.269	1.7541	0.222501	3.18271e-15	1.92596e-12
Zm00001d012764	585.193	0.77473	0.235736	0.00101466	0.0144471
Zm00001d012770	6099.16	-0.537821	0.137641	9.32933e-05	0.00235228
Zm00001d012785	167.448	-1.53708	0.331256	3.48123e-06	0.000172523
Zm00001d012787	378.973	-0.826954	0.229358	0.000311524	0.00597174
Zm00001d012801	298.114	-0.725078	0.249247	0.00362501	0.0370202
Zm00001d012818	194.871	1.06688	0.333535	0.00138044	0.0180442
Zm00001d012821	1656.6	-0.793119	0.159015	6.1107e-07	4.15304e-05
Zm00001d012834	1177.38	-0.799357	0.19974	6.28096e-05	0.00171737
Zm00001d012838	1360.98	-0.623598	0.200246	0.00184465	0.0225147
Zm00001d012875	352.049	-1.05203	0.233457	6.59687e-06	0.000284606
Zm00001d012895	509.245	-1.00447	0.21107	1.94594e-06	0.000109139
Zm00001d012909	1206.74	-0.6126	0.163379	0.000177141	0.00388308
Zm00001d012916	319.263	-0.866883	0.246191	0.000429624	0.00758771
Zm00001d012935	33.5159	2.55354	0.777603	0.00102396	0.0145524
Zm00001d012939	18.0326	2.75019	0.987875	0.00537021	0.0486368
Zm00001d012958	732.752	-1.02622	0.189733	6.34581e-08	6.26274e-06
Zm00001d012968	427.314	-0.808462	0.23987	0.000750538	0.0116455
Zm00001d012993	609.922	-0.846946	0.210648	5.80332e-05	0.00160974
Zm00001d013005	1655.11	-0.57677	0.154331	0.000186062	0.00402492
Zm00001d013012	1438.5	-0.526829	0.167292	0.0016374	0.0205412
Zm00001d013033	240.113	-1.15001	0.268962	1.90519e-05	0.00066556
Zm00001d013049	446.49	-0.612794	0.220165	0.0053803	0.0486895
Zm00001d013053	506.06	-0.752224	0.208399	0.000306745	0.00590754
Zm00001d013105	56.6251	-1.80728	0.530355	0.000655199	0.0105359
Zm00001d013107	772.105	-0.689566	0.183449	0.000170666	0.00377523
Zm00001d013112	368.277	-0.684913	0.235541	0.00363949	0.0370967
Zm00001d013139	551.336	-0.691339	0.208998	0.000940065	0.0137068
Zm00001d013150	112.604	2.31854	0.444132	1.7855e-07	1.48222e-05
Zm00001d013193	1026.99	-0.764509	0.211526	0.000301213	0.0058352
Zm00001d013202	387.043	0.647643	0.23211	0.00526688	0.0481222
Zm00001d013226	166.248	1.42019	0.333619	2.07257e-05	0.000714526
Zm00001d013230	19.9083	2.70846	0.900048	0.00261905	0.0293495
Zm00001d013243	441.961	1.20967	0.290304	3.08765e-05	0.000963372
Zm00001d013245	1734.79	0.725382	0.15309	2.15559e-06	0.000118868
Zm00001d013262	246.113	1.1758	0.265707	9.63729e-06	0.000389274
Zm00001d013276	98.6052	1.78322	0.43681	4.45774e-05	0.00130747
Zm00001d013367	16710.7	0.83499	0.134889	6.00943e-10	1.21376e-07
Zm00001d013384	922.029	0.897447	0.207233	1.48688e-05	0.000545308
Zm00001d013385	114.232	1.45233	0.3826	0.000147086	0.00337549
Zm00001d013410	360.539	0.891461	0.233759	0.000136966	0.00320401
Zm00001d013487	66.0584	1.65154	0.487071	0.000696998	0.0110441
Zm00001d013495	49.4309	1.95632	0.565861	0.000545716	0.00913966
Zm00001d013498	485.234	-0.719154	0.257567	0.00523657	0.047992
Zm00001d013532	1058.47	-0.659688	0.19489	0.000711992	0.0111985
Zm00001d013592	47.9803	1.58507	0.567522	0.00522274	0.0479429
Zm00001d013594	130.047	-1.16124	0.343936	0.000734655	0.0114765
Zm00001d013620	1466.07	-0.564335	0.157537	0.00034067	0.00638444
Zm00001d013624	78.7557	2.0315	0.45129	6.74584e-06	0.000288865
Zm00001d013644	1173.62	-0.894769	0.192027	3.1681e-06	0.00015976
Zm00001d013658	489.976	-0.714053	0.210142	0.000678923	0.010804
Zm00001d013709	150.139	1.00633	0.343552	0.00339841	0.0352965
Zm00001d013736	2473.11	-1.11593	0.177572	3.29245e-10	7.0757e-08
Zm00001d013745	864.077	-0.724859	0.190939	0.000146885	0.00337549
Zm00001d013751	1320.71	0.897359	0.19492	4.15014e-06	0.000198818
Zm00001d013757	2196.16	-0.542608	0.1495	0.000284001	0.00555796
Zm00001d013780	3813.37	-0.554288	0.148449	0.000188576	0.00406782
Zm00001d013786	716.605	-0.64186	0.217526	0.00317029	0.0336514
Zm00001d013801	141.236	-1.18431	0.344605	0.000588815	0.00971292
Zm00001d013810	203.388	1.20913	0.355691	0.000675389	0.0107702
Zm00001d013829	2028.13	-0.510121	0.153625	0.000898361	0.0132488
Zm00001d013836	572.011	1.10438	0.202543	4.96483e-08	5.0516e-06
Zm00001d013886	213.495	0.880032	0.294763	0.00283057	0.031159
Zm00001d013907	979.235	1.48698	0.257475	7.68368e-09	1.02131e-06
Zm00001d013911	208.638	0.994178	0.299648	0.000907246	0.0133219
Zm00001d013934	230.193	1.09239	0.28133	0.000103192	0.00255359
Zm00001d013997	99.6755	-2.09233	0.39963	1.64385e-07	1.38972e-05
Zm00001d014017	2102.27	-0.649356	0.175617	0.000217674	0.00453389
Zm00001d014019	925.13	-0.731412	0.217896	0.000788785	0.012062
Zm00001d014043	294.16	-1.43431	0.314353	5.04921e-06	0.000232213
Zm00001d014058	1673.83	-0.723162	0.155423	3.27356e-06	0.000163999
Zm00001d014109	698.625	-0.701877	0.19842	0.000404196	0.00727547
Zm00001d014110	111.746	-1.73806	0.415121	2.82815e-05	0.000898251
Zm00001d014129	120.059	1.72468	0.368119	2.79786e-06	0.000144577
Zm00001d014140	197.775	1.23829	0.314518	8.24731e-05	0.00212426
Zm00001d014141	342.395	0.97948	0.279593	0.000459634	0.00798887
Zm00001d014159	1494.26	-0.781759	0.197776	7.72607e-05	0.00202838
Zm00001d014166	474.847	-0.93352	0.220069	2.216e-05	0.000754919
Zm00001d014186	615.77	0.799671	0.196071	4.53312e-05	0.0013254
Zm00001d014205	136.528	2.09669	0.403795	2.07532e-07	1.6686e-05
Zm00001d014282	155.657	1.02913	0.335743	0.00217512	0.025571
Zm00001d014286	1754.65	-0.528704	0.152151	0.000511097	0.0086544
Zm00001d014292	128.707	1.04072	0.352543	0.00315696	0.0335618
Zm00001d014297	277.001	-1.18343	0.259266	5.00545e-06	0.000231125
Zm00001d014319	52.3023	1.58509	0.555282	0.00430958	0.0417434
Zm00001d014377	1033.23	0.688953	0.221334	0.00185361	0.0226001
Zm00001d014383	298.196	-0.848238	0.260882	0.0011483	0.0157737
Zm00001d014443	111.523	1.51216	0.410891	0.000233063	0.00479793
Zm00001d014482	366.46	-1.06324	0.272457	9.52464e-05	0.00238064
Zm00001d014508	377.262	-1.76455	0.236621	8.83226e-14	4.14486e-11
Zm00001d014509	133.183	-1.80538	0.384487	2.65894e-06	0.000138331
Zm00001d014563	276.414	1.29033	0.327065	7.97387e-05	0.00207185
Zm00001d014569	751.434	-0.698674	0.201577	0.000528182	0.00889783
Zm00001d014584	75.4172	1.60417	0.448145	0.000344134	0.0064284
Zm00001d014608	497.316	0.973594	0.242313	5.87161e-05	0.00162281
Zm00001d014617	861.64	1.5658	0.252982	6.04063e-10	1.21376e-07
Zm00001d014625	153.747	-1.43521	0.357423	5.93375e-05	0.00163409
Zm00001d014642	1411.77	-0.583045	0.162048	0.000320707	0.00610953
Zm00001d014659	64.3554	3.04427	0.572088	1.03008e-07	9.70093e-06
Zm00001d014756	121.797	1.63151	0.397804	4.10851e-05	0.00121746
Zm00001d014757	160.887	1.31798	0.361506	0.000266557	0.00528858
Zm00001d014761	545.819	-0.576272	0.201528	0.00424289	0.0412448
Zm00001d014771	762.701	-0.675165	0.190962	0.000406852	0.00730332
Zm00001d014773	920.84	-0.593546	0.178813	0.000902229	0.0132787
Zm00001d014788	64.9706	2.0052	0.563752	0.000375276	0.00686513
Zm00001d014794	68.1035	1.59713	0.519919	0.00212717	0.02511
Zm00001d014808	414.568	-0.638799	0.219112	0.00355232	0.036483
Zm00001d014813	467.738	0.754665	0.256882	0.00330561	0.0346048
Zm00001d014844	7786.15	-0.803672	0.146582	4.18809e-08	4.37292e-06
Zm00001d014852	824.275	-4.84055	0.595098	4.15198e-16	3.40981e-13
Zm00001d014853	160.088	1.00584	0.350257	0.00408229	0.0399967
Zm00001d014858	4395.4	0.680196	0.163553	3.1984e-05	0.000991201
Zm00001d014900	1102.2	-0.599041	0.169021	0.000393841	0.00714225
Zm00001d014903	197.169	0.971317	0.292298	0.000890444	0.0131762
Zm00001d014911	321.058	1.18892	0.25652	3.57264e-06	0.000175627
Zm00001d014919	19.0298	2.78988	0.93597	0.00287559	0.0314728
Zm00001d014948	260.906	1.22843	0.271446	6.02512e-06	0.000264599
Zm00001d014957	8990.89	-0.566558	0.159715	0.000389187	0.00707458
Zm00001d014993	7916.89	-0.80737	0.148525	5.45164e-08	5.47426e-06
Zm00001d015033	282.665	-0.786214	0.283266	0.00551119	0.0495232
Zm00001d015059	61.3441	1.8162	0.522654	0.000510944	0.0086544
Zm00001d015088	2125.01	-0.50092	0.169848	0.00318564	0.0337157
Zm00001d015095	528.151	0.718554	0.219259	0.00104846	0.0148092
Zm00001d015097	152.361	0.948896	0.328824	0.00390513	0.0387564
Zm00001d015200	924.594	-1.55842	0.177103	1.37468e-18	1.58053e-15
Zm00001d015205	237.063	-1.13753	0.268499	2.26905e-05	0.00076618
Zm00001d015212	777.466	0.738785	0.183669	5.76123e-05	0.00160387
Zm00001d015239	217.099	1.0445	0.316878	0.000979915	0.0141185
Zm00001d015242	727.317	-1.05961	0.194002	4.71241e-08	4.85927e-06
Zm00001d015243	746.143	-1.49264	0.189872	3.80252e-15	2.24202e-12
Zm00001d015246	943.03	0.508725	0.176979	0.00404682	0.0397848
Zm00001d015259	1778.92	-0.597085	0.155585	0.0001242	0.00295345
Zm00001d015269	3105.96	-0.557392	0.143204	9.93052e-05	0.00246601
Zm00001d015279	3423.38	-0.517329	0.147002	0.000432857	0.00763308
Zm00001d015348	528.121	0.822481	0.218601	0.000168244	0.00374881
Zm00001d015361	297.178	0.954976	0.246574	0.000107514	0.00261895
Zm00001d015399	2372.09	-0.701746	0.151075	3.40043e-06	0.000169248
Zm00001d015404	272.106	0.944356	0.315088	0.00272542	0.0302523
Zm00001d015405	64.2998	1.50704	0.493915	0.00227919	0.0263698
Zm00001d015406	784.941	0.795601	0.245434	0.00118858	0.016182
Zm00001d015414	271.232	-1.65835	0.335175	7.50883e-07	4.8297e-05
Zm00001d015426	827.676	-0.556826	0.196291	0.0045576	0.0434683
Zm00001d015482	35.8112	-2.04361	0.673941	0.0024267	0.0276522
Zm00001d015614	764.843	1.10448	0.192055	8.88003e-09	1.13442e-06
Zm00001d015638	953.344	0.6571	0.199816	0.00100712	0.0143843
Zm00001d015723	58.9609	1.76791	0.50682	0.000486203	0.00833723
Zm00001d015746	15847	-0.907327	0.131568	5.33909e-12	1.83242e-09
Zm00001d015767	235.479	0.968066	0.334786	0.00383287	0.0383371
Zm00001d015802	73.2945	1.59755	0.499537	0.00138354	0.0180457
Zm00001d015804	140.249	1.01975	0.33722	0.00249458	0.0282398
Zm00001d015844	855.101	-1.62795	0.204747	1.85016e-15	1.18179e-12
Zm00001d015877	183.91	-1.07528	0.330782	0.00115116	0.0158035
Zm00001d015914	178.166	1.07775	0.308064	0.000467952	0.00808383
Zm00001d015917	24.2999	2.88542	0.857352	0.00076404	0.0117834
Zm00001d015956	459.153	0.701067	0.24719	0.0045662	0.0434781
Zm00001d015971	911.298	-1.25074	0.1782	2.23859e-12	8.57941e-10
Zm00001d016034	1623.72	0.658866	0.16651	7.59209e-05	0.00200667
Zm00001d016041	824.167	-0.715264	0.179879	6.99772e-05	0.0018689
Zm00001d016066	186.491	-0.841098	0.300692	0.00515465	0.0475838
Zm00001d016075	545.511	-0.827993	0.210329	8.26274e-05	0.0021253
Zm00001d016082	224.371	1.65608	0.374058	9.54014e-06	0.000388275
Zm00001d016098	775.037	1.1156	0.263949	2.3727e-05	0.000787304
Zm00001d016131	629.029	-0.634251	0.193047	0.00101812	0.0144785
Zm00001d016149	265.93	1.09544	0.319041	0.000595737	0.00981301
Zm00001d016163	25.4855	2.5849	0.840344	0.00209796	0.0249111
Zm00001d016181	845.033	-0.789693	0.177879	9.01728e-06	0.000370934
Zm00001d016280	19.7407	2.51807	0.904438	0.00536722	0.0486368
Zm00001d016305	1132.35	-0.880891	0.175815	5.43386e-07	3.7299e-05
Zm00001d016306	67.4248	1.78623	0.488931	0.000258859	0.0051581
Zm00001d016411	2405.59	0.848446	0.196307	1.54593e-05	0.000563369
Zm00001d016438	524.949	1.30901	0.214126	9.76199e-10	1.72675e-07
Zm00001d016441	331.063	-0.7872	0.241822	0.00113278	0.0156539
Zm00001d016459	2003.32	-0.701251	0.14916	2.58459e-06	0.00013586
Zm00001d016460	2072.4	-0.951046	0.190693	6.12255e-07	4.15304e-05
Zm00001d016474	659.586	-0.739701	0.222517	0.000886569	0.0131612
Zm00001d016483	1069.81	-0.68833	0.207116	0.000889275	0.0131673
Zm00001d016501	767.416	-0.839763	0.194195	1.53003e-05	0.000558462
Zm00001d016516	1161.45	-0.735265	0.168189	1.23305e-05	0.000470995
Zm00001d016531	355.435	0.671753	0.23914	0.00496898	0.0462411
Zm00001d016572	6544.21	-1.09474	0.158341	4.71727e-12	1.64354e-09
Zm00001d016604	372.957	-1.04289	0.303205	0.000582684	0.00963251
Zm00001d016664	792.173	-0.669134	0.20739	0.00125336	0.0168544
Zm00001d016684	15150.2	-0.828073	0.143658	8.20502e-09	1.06596e-06
Zm00001d016696	162.941	0.987771	0.314491	0.00168456	0.0209726
Zm00001d016741	1914.86	-0.70797	0.153032	3.72286e-06	0.000181756
Zm00001d016811	3742.26	-0.539414	0.143453	0.000169766	0.00376813
Zm00001d016832	737.485	-0.732888	0.189436	0.000109378	0.0026559
Zm00001d016841	226.525	-1.23012	0.316549	0.000101895	0.00252615
Zm00001d016844	27.6633	-2.20972	0.733848	0.00260269	0.0292088
Zm00001d016849	44.8519	2.27658	0.77173	0.00317801	0.0336922
Zm00001d016907	1048.14	-0.685405	0.173424	7.74408e-05	0.00202942
Zm00001d016963	270.201	0.939265	0.267158	0.000438482	0.00770118
Zm00001d016999	404.147	-0.655352	0.223173	0.00331912	0.0346608
Zm00001d017030	899.508	-0.815727	0.19749	3.6203e-05	0.00110263
Zm00001d017031	83.5661	1.7701	0.438591	5.43965e-05	0.00154045
Zm00001d017032	590.361	1.22708	0.225792	5.49328e-08	5.49209e-06
Zm00001d017033	211.856	1.34368	0.320901	2.82422e-05	0.000898243
Zm00001d017034	216.39	1.55679	0.297219	1.62459e-07	1.3785e-05
Zm00001d017042	290.538	0.749173	0.250801	0.00281615	0.0310438
Zm00001d017043	24.4391	2.74601	0.813267	0.000734101	0.0114756
Zm00001d017050	136.926	0.989597	0.344445	0.00406567	0.0398999
Zm00001d017096	743.172	0.647449	0.18334	0.000413361	0.00737984
Zm00001d017140	270.436	1.29377	0.340468	0.000144716	0.00334198
Zm00001d017167	135.773	1.70457	0.381566	7.92178e-06	0.000331205
Zm00001d017168	2098.25	-0.647523	0.152764	2.24802e-05	0.000760194
Zm00001d017187	458.475	-0.853523	0.231229	0.000223152	0.00462026
Zm00001d017204	985.142	-0.739233	0.170678	1.48327e-05	0.000544853
Zm00001d017205	105.121	1.36336	0.387605	0.000435809	0.00767338
Zm00001d017280	900.676	-0.925607	0.252587	0.000247808	0.00500612
Zm00001d017376	60.2853	-1.87344	0.655479	0.00426162	0.0414009
Zm00001d017387	112.536	1.57103	0.394994	6.96904e-05	0.00186439
Zm00001d017399	1114.64	0.769657	0.184907	3.14915e-05	0.0009799
Zm00001d017453	149.577	1.06639	0.367052	0.00366925	0.0373338
Zm00001d017492	155.717	0.956029	0.326544	0.00341462	0.0354009
Zm00001d017493	1256.87	1.07746	0.165629	7.75705e-11	2.09829e-08
Zm00001d017547	1097.8	-0.931163	0.194637	1.71763e-06	9.72832e-05
Zm00001d017560	1773.19	-0.512797	0.154075	0.000874007	0.0130505
Zm00001d017592	74.7652	2.50113	0.551344	5.72153e-06	0.000254074
Zm00001d017622	498.967	-0.644883	0.221155	0.00354576	0.0364319
Zm00001d017643	291.987	0.978255	0.294346	0.000888993	0.0131673
Zm00001d017686	115.639	1.25042	0.375321	0.000863491	0.0129271
Zm00001d017699	358.029	0.715654	0.247718	0.00386478	0.0385389
Zm00001d017720	553.928	0.847199	0.221909	0.000134664	0.00315657
Zm00001d017742	128.367	1.15281	0.386258	0.00283983	0.0312151
Zm00001d017746	104.781	1.47179	0.394798	0.000193029	0.00415608
Zm00001d017787	699.286	-0.689337	0.205482	0.000794441	0.0121222
Zm00001d017830	813.438	0.737897	0.204739	0.000313253	0.00599271
Zm00001d017852	432.735	1.08931	0.246183	9.65448e-06	0.000389274
Zm00001d017860	806.247	-0.634603	0.182638	0.000511524	0.00865527
Zm00001d017871	44.4561	2.42641	0.677233	0.00033989	0.00637502
Zm00001d017877	1028.83	-0.738547	0.177821	3.27683e-05	0.00101006
Zm00001d017882	1614.53	-1.07718	0.180625	2.46717e-09	3.75713e-07
Zm00001d017886	53.0063	1.87168	0.532238	0.000437072	0.00768973
Zm00001d017961	1562.67	-0.609841	0.169253	0.000314396	0.00600959
Zm00001d017964	30.2879	2.00332	0.709325	0.00473895	0.0446551
Zm00001d017986	43.2474	3.18106	0.699355	5.40121e-06	0.000244009
Zm00001d017987	434.536	0.852051	0.235917	0.000304246	0.00587911
Zm00001d018025	670.309	-0.645772	0.191252	0.000734014	0.0114756
Zm00001d018029	227.761	-1.04875	0.351665	0.00286154	0.0313637
Zm00001d018031	139.001	1.19155	0.386765	0.00206443	0.0245458
Zm00001d018080	428.096	1.21028	0.300929	5.77495e-05	0.00160406
Zm00001d018090	209.39	1.09879	0.303408	0.000292899	0.00569333
Zm00001d018099	618.614	-0.5883	0.203414	0.00382634	0.038319
Zm00001d018103	617.084	-1.05092	0.226776	3.58382e-06	0.000175627
Zm00001d018133	1709.35	-0.742388	0.158519	2.8234e-06	0.00014557
Zm00001d018151	159.284	1.78671	0.369322	1.31271e-06	7.75985e-05
Zm00001d018191	88.4019	1.34595	0.484229	0.00544288	0.0490875
Zm00001d018199	1525.24	-1.26595	0.157865	1.0643e-15	7.64799e-13
Zm00001d018204	535.829	-0.908603	0.201593	6.57122e-06	0.000284133
Zm00001d018229	325.877	-1.0627	0.319213	0.000871185	0.0130253
Zm00001d018255	121.009	1.07654	0.357882	0.00262906	0.0294186
Zm00001d018323	11.3027	5.39429	1.79649	0.00267604	0.0297848
Zm00001d018349	975.319	-0.538456	0.189019	0.00439009	0.0423271
Zm00001d018366	725.664	-0.564478	0.200136	0.00479541	0.0450267
Zm00001d018377	1045.15	1.36398	0.205274	3.03892e-11	8.62715e-09
Zm00001d018382	1179.48	-0.72525	0.17505	3.4263e-05	0.00105191
Zm00001d018388	341.066	0.712784	0.244657	0.00357521	0.0366527
Zm00001d018415	372.57	1.45106	0.273676	1.1447e-07	1.04335e-05
Zm00001d018432	890.946	-0.67162	0.190522	0.000423245	0.00752126
Zm00001d018445	1671.41	-0.881439	0.161534	4.85083e-08	4.97968e-06
Zm00001d018484	329.993	0.678063	0.239563	0.00464872	0.0440831
Zm00001d018496	1033.68	-0.62785	0.178925	0.000449778	0.00785318
Zm00001d018497	956.585	0.844148	0.199778	2.38494e-05	0.00078909
Zm00001d018507	982.133	-0.610108	0.199264	0.00220004	0.0257718
Zm00001d018552	76.5295	1.26336	0.439918	0.0040812	0.0399967
Zm00001d018621	73.8668	1.5695	0.487554	0.00128578	0.0171678
Zm00001d018624	167.537	2.25065	0.357443	3.04405e-10	6.79592e-08
Zm00001d018655	60.3526	-1.48528	0.507866	0.00344961	0.0356322
Zm00001d018669	785.409	-0.556358	0.184879	0.00261848	0.0293495
Zm00001d018696	477.353	0.815702	0.248886	0.00104763	0.0148066
Zm00001d018704	334.539	1.19132	0.250112	1.9059e-06	0.000107154
Zm00001d018719	40.2333	2.02645	0.613196	0.000950697	0.0138026
Zm00001d018781	42.572	-1.73023	0.616874	0.00503425	0.0467106
Zm00001d018792	592.443	-0.991915	0.200304	7.34369e-07	4.77903e-05
Zm00001d018799	1551.66	-0.547786	0.177332	0.00200803	0.0239868
Zm00001d018809	898.465	0.643467	0.192052	0.000806697	0.0122604
Zm00001d018822	173.177	1.00895	0.31869	0.00154585	0.0197045
Zm00001d018857	1069.8	0.65166	0.171805	0.000148829	0.0034053
Zm00001d018859	1730.84	-0.669962	0.159706	2.72906e-05	0.000874021
Zm00001d018869	750.788	0.588548	0.201235	0.00344803	0.0356322
Zm00001d018870	544.039	-0.701518	0.205797	0.000652512	0.0105147
Zm00001d018872	2786.23	-0.814039	0.1539	1.22725e-07	1.09808e-05
Zm00001d018881	29.6015	4.74451	0.974523	1.12424e-06	6.91226e-05
Zm00001d018954	35.8181	2.48054	0.701154	0.000403474	0.00727107
Zm00001d018959	596.147	-0.833239	0.205599	5.06233e-05	0.0014551
Zm00001d018969	1356.4	-0.67344	0.165343	4.6416e-05	0.00135277
Zm00001d018971	8696.94	-0.508737	0.173797	0.00342046	0.0354455
Zm00001d018973	1141.53	0.558155	0.177593	0.00167294	0.0208392
Zm00001d018976	544.927	1.00663	0.255682	8.24947e-05	0.00212426
Zm00001d019002	321.829	0.829428	0.244925	0.000708026	0.0111514
Zm00001d019035	16.0846	4.25955	1.32051	0.00125675	0.0168803
Zm00001d019040	2144.48	-0.842649	0.158816	1.12162e-07	1.03167e-05
Zm00001d019070	1654.41	-0.532495	0.183149	0.00364403	0.0371265
Zm00001d019117	366.267	-1.03542	0.342588	0.00250814	0.0283414
Zm00001d019155	236475	-1.20652	0.146904	2.15789e-16	1.83781e-13
Zm00001d019156	289641	-1.2473	0.155812	1.19346e-15	8.31622e-13
Zm00001d019192	3831.55	-0.769967	0.160313	1.56386e-06	9.01276e-05
Zm00001d019225	148.842	1.14843	0.343316	0.000822481	0.0124591
Zm00001d019233	1125.22	-0.579066	0.178833	0.00120355	0.0163472
Zm00001d019263	682.692	-0.603864	0.191024	0.00157123	0.0199374
Zm00001d019265	2712.38	-0.642412	0.147479	1.32488e-05	0.00049862
Zm00001d019277	11715.9	0.688826	0.160617	1.79781e-05	0.000639947
Zm00001d019311	3642.06	-1.54238	0.140412	4.52758e-28	1.7352e-24
Zm00001d019325	147.104	1.03	0.349425	0.00320144	0.0338314
Zm00001d019326	62.5003	2.43614	0.512067	1.96037e-06	0.000109414
Zm00001d019342	1239.46	-1.1068	0.164405	1.67131e-11	5.12424e-09
Zm00001d019348	474.429	-0.617228	0.20904	0.00315029	0.0335463
Zm00001d019363	358.76	-0.796071	0.228836	0.000503693	0.00855308
Zm00001d019374	259.361	0.72579	0.259826	0.0052162	0.047902
Zm00001d019446	3264.27	0.800909	0.202196	7.46191e-05	0.00197681
Zm00001d019467	789.98	0.546383	0.188206	0.00369475	0.0375269
Zm00001d019479	357.901	0.743551	0.246733	0.00258186	0.0289892
Zm00001d019504	2191.18	1.01853	0.215956	2.4008e-06	0.000129593
Zm00001d019536	770.97	-0.635443	0.181809	0.000473857	0.00816206
Zm00001d019565	180.892	1.61848	0.380311	2.08425e-05	0.000717476
Zm00001d019593	245.872	1.25611	0.326832	0.000121405	0.00290198
Zm00001d019670	2443.09	-0.500637	0.180299	0.00549129	0.0494023
Zm00001d019700	596.041	-0.63275	0.205187	0.00204389	0.0243646
Zm00001d019724	717.792	0.790761	0.21024	0.000169076	0.00375995
Zm00001d019750	505.402	0.845718	0.227359	0.000199417	0.00424496
Zm00001d019824	3955.1	-0.570108	0.145563	8.98128e-05	0.00228204
Zm00001d019920	1611.1	-0.837322	0.158625	1.30152e-07	1.15109e-05
Zm00001d019933	24.4578	5.48529	1.25727	1.28373e-05	0.00048712
Zm00001d019966	63.952	3.5697	0.577212	6.23438e-10	1.23586e-07
Zm00001d020055	733.856	-0.876862	0.20768	2.41944e-05	0.000798205
Zm00001d020101	2684.25	-0.750156	0.14704	3.36596e-07	2.49249e-05
Zm00001d020140	446.826	0.869206	0.269643	0.00126616	0.0169769
Zm00001d020175	3685.75	-0.626973	0.140749	8.40698e-06	0.000350215
Zm00001d020178	1425.03	-0.689198	0.160654	1.78699e-05	0.000637083
Zm00001d020182	179.035	0.872471	0.311319	0.00507091	0.0469805
Zm00001d020225	165.602	0.988819	0.339895	0.00362368	0.0370202
Zm00001d020268	285.212	1.28243	0.353798	0.000289229	0.00563629
Zm00001d020296	264.803	-0.830254	0.274245	0.00246653	0.0279812
Zm00001d020309	317.406	0.802077	0.253481	0.00155485	0.0197643
Zm00001d020312	221.871	1.04237	0.28691	0.000280067	0.00549968
Zm00001d020355	248.923	1.35491	0.267731	4.17731e-07	2.96473e-05
Zm00001d020367	652.751	-0.603201	0.203887	0.00309133	0.0331379
Zm00001d020380	75.6209	1.5098	0.455728	0.000923215	0.0134961
Zm00001d020392	123.348	1.40085	0.35889	9.48938e-05	0.00237708
Zm00001d020420	56.9153	1.9583	0.528015	0.000208243	0.00438867
Zm00001d020429	152.363	0.911012	0.328638	0.00556995	0.0499536
Zm00001d020460	142.119	1.09287	0.339817	0.00129962	0.0172445
Zm00001d020461	478.524	0.97087	0.23413	3.37292e-05	0.00103742
Zm00001d020487	172.93	1.23078	0.355068	0.000527604	0.00889461
Zm00001d020515	66.1225	1.59346	0.486882	0.00106497	0.0149505
Zm00001d020550	25.7729	3.66433	0.912669	5.94551e-05	0.00163537
Zm00001d020552	221.385	0.85104	0.304656	0.00521501	0.047902
Zm00001d020555	36.7874	2.3231	0.659555	0.000427939	0.00756376
Zm00001d020584	492.8	0.657585	0.223671	0.00328253	0.0344508
Zm00001d020592	1.10759e+06	-0.67461	0.145584	3.58969e-06	0.000175627
Zm00001d020602	621.392	-0.962342	0.219579	1.17239e-05	0.000454623
Zm00001d020612	292.367	-1.21812	0.264943	4.27277e-06	0.000203843
Zm00001d020642	490.313	0.625625	0.220237	0.00450158	0.0430646
Zm00001d020673	59.6258	1.56602	0.50386	0.00188331	0.0228717
Zm00001d020685	133.375	1.02605	0.365331	0.00497663	0.0462748
Zm00001d020706	732.906	-0.698603	0.185037	0.000159706	0.00360397
Zm00001d020765	550.721	-0.654914	0.201254	0.00113725	0.0156758
Zm00001d020799	415.775	0.729298	0.247197	0.00317495	0.0336753
Zm00001d020862	138.989	1.06589	0.372995	0.00426782	0.041434
Zm00001d020888	344.151	0.962765	0.237489	5.03634e-05	0.00145126
Zm00001d020938	461.406	0.980685	0.282878	0.000526657	0.00889168
Zm00001d020948	213.339	-0.884204	0.281736	0.00169867	0.0211026
Zm00001d021024	280.307	0.737596	0.253368	0.0036009	0.0368503
Zm00001d021046	2921.66	0.690686	0.19126	0.00030474	0.00588371
Zm00001d021050	333.196	1.23125	0.279446	1.05279e-05	0.000417393
Zm00001d021119	1509.75	1.01914	0.158721	1.35438e-10	3.34881e-08
Zm00001d021123	1917.49	-0.574725	0.166804	0.000569992	0.00945669
Zm00001d021136	1262.36	-0.638076	0.164552	0.00010547	0.00258832
Zm00001d021147	2547.82	-0.529541	0.149161	0.000385057	0.00700506
Zm00001d021160	34.5209	2.05378	0.726122	0.00467784	0.0443209
Zm00001d021170	829.832	0.98624	0.196039	4.88338e-07	3.41317e-05
Zm00001d021196	3481.61	-0.730912	0.143293	3.38185e-07	2.49249e-05
Zm00001d021225	125.573	1.12744	0.356676	0.00157249	0.0199374
Zm00001d021231	1023.6	-0.631498	0.176416	0.000344126	0.0064284
Zm00001d021236	128.723	1.17545	0.359033	0.00106063	0.0149169
Zm00001d021289	2688.16	-1.05191	0.204857	2.824e-07	2.18646e-05
Zm00001d021298	75.7876	1.60936	0.472658	0.000661828	0.010605
Zm00001d021336	165.05	1.27369	0.325333	9.03935e-05	0.00229173
Zm00001d021407	474.572	0.6823	0.212448	0.00131992	0.0174735
Zm00001d021414	53.5977	1.52618	0.5284	0.00387316	0.038587
Zm00001d021430	415.084	0.680669	0.232337	0.00339324	0.0352747
Zm00001d021433	488.202	1.5333	0.238137	1.20463e-10	3.01092e-08
Zm00001d021446	789.89	-0.636156	0.18267	0.000496689	0.00846026
Zm00001d021447	83.9385	1.18371	0.423471	0.00518598	0.0477389
Zm00001d021477	209.424	1.11866	0.305071	0.00024552	0.00497745
Zm00001d021490	94.092	1.28967	0.415766	0.00192273	0.0232457
Zm00001d021494	144.709	-1.4787	0.365441	5.20228e-05	0.00148789
Zm00001d021522	431.643	-0.843754	0.215498	9.02678e-05	0.00229107
Zm00001d021526	3819.31	-1.01478	0.159992	2.25767e-10	5.19151e-08
Zm00001d021537	880.577	-1.30935	0.186427	2.16593e-12	8.44161e-10
Zm00001d021541	1274.72	-0.568829	0.184559	0.00205543	0.0244514
Zm00001d021582	359.727	-0.849697	0.267941	0.00151807	0.0194365
Zm00001d021615	773.781	0.75399	0.206501	0.000260959	0.00518647
Zm00001d021648	294.26	0.700706	0.246671	0.00450217	0.0430646
Zm00001d021653	169.041	1.19106	0.329206	0.000296899	0.0057662
Zm00001d021656	236.529	-0.934027	0.306516	0.00230959	0.0265147
Zm00001d021690	116.303	1.21006	0.412042	0.00331675	0.0346518
Zm00001d021696	194.647	0.931504	0.292609	0.00145535	0.0187799
Zm00001d021721	1070.01	-0.619718	0.172298	0.000322173	0.00612262
Zm00001d021741	3138.66	-0.645768	0.150315	1.73826e-05	0.000623577
Zm00001d021752	571.502	-0.669731	0.198073	0.000721603	0.0113342
Zm00001d021772	255.28	-0.79503	0.266327	0.0028343	0.0311841
Zm00001d021773	77.364	-1.52938	0.514114	0.00293186	0.0318859
Zm00001d021788	2201.08	-1.20239	0.148119	4.74953e-16	3.76605e-13
Zm00001d021791	248.982	1.48417	0.270049	3.88699e-08	4.11896e-06
Zm00001d021828	853.604	-0.618697	0.178554	0.00053014	0.00892429
Zm00001d021842	396.983	-0.85992	0.243212	0.000406725	0.00730332
Zm00001d021843	6344.63	0.613531	0.198238	0.00196861	0.0236387
Zm00001d021879	143.209	1.27519	0.409152	0.00182907	0.022384
Zm00001d021891	2031.1	-0.771529	0.156639	8.41287e-07	5.34403e-05
Zm00001d021900	105.192	-1.08699	0.388891	0.00518817	0.0477399
Zm00001d021901	2722.8	1.83108	0.551179	0.000893403	0.0131945
Zm00001d021904	217.921	-0.767974	0.275702	0.00534414	0.0484576
Zm00001d021932	426.164	-0.696905	0.22394	0.00185813	0.0226432
Zm00001d021948	387.16	-0.78353	0.248373	0.00160692	0.0202361
Zm00001d021951	1048.07	-0.799675	0.176772	6.07484e-06	0.000265285
Zm00001d021957	417.396	0.820299	0.253626	0.00121945	0.0165143
Zm00001d021961	668.834	-1.35752	0.210433	1.11059e-10	2.86945e-08
Zm00001d021962	406.831	-0.68351	0.220901	0.00197355	0.0236611
Zm00001d021978	482.488	-0.630752	0.206722	0.0022792	0.0263698
Zm00001d021999	3974.78	-0.558547	0.139095	5.92974e-05	0.00163409
Zm00001d022040	1387.38	-0.600804	0.167782	0.000342451	0.00641259
Zm00001d022059	359.546	-0.731508	0.247816	0.00315907	0.0335687
Zm00001d022077	4759.49	-0.626261	0.151586	3.60568e-05	0.00109964
Zm00001d022084	19.0948	2.84455	0.959536	0.00303173	0.0327192
Zm00001d022089	242.173	0.849793	0.266669	0.00143907	0.0186069
Zm00001d022099	679.959	-1.19993	0.195317	8.07234e-10	1.48499e-07
Zm00001d022104	1017.71	-0.817737	0.188759	1.47642e-05	0.000543206
Zm00001d022109	247.795	1.01896	0.286126	0.000369125	0.00679043
Zm00001d022125	1562.44	-0.943304	0.156621	1.71367e-09	2.69903e-07
Zm00001d022132	1420.27	-0.515378	0.165227	0.00181331	0.0222503
Zm00001d022141	375.801	0.78363	0.232302	0.000742681	0.0115787
Zm00001d022144	603.09	0.788887	0.25876	0.00229819	0.0264631
Zm00001d022148	459.363	-0.661419	0.213213	0.00192119	0.0232457
Zm00001d022160	1290.53	-0.502816	0.175958	0.00426863	0.041434
Zm00001d022181	1162	0.744499	0.18659	6.60691e-05	0.00178947
Zm00001d022204	288.798	0.86029	0.296505	0.00371462	0.0376455
Zm00001d022225	429.442	-0.647097	0.214605	0.00256725	0.0288674
Zm00001d022237	217.745	1.08889	0.282261	0.000114435	0.00276121
Zm00001d022245	109.255	1.96235	0.423468	3.58666e-06	0.000175627
Zm00001d022273	800.663	-0.56284	0.186356	0.00252581	0.0284881
Zm00001d022276	174.179	1.71535	0.336012	3.30734e-07	2.46923e-05
Zm00001d022278	3576.01	0.991043	0.173642	1.14713e-08	1.4486e-06
Zm00001d022303	824.677	0.745668	0.232732	0.00135543	0.0177798
Zm00001d022314	81.6553	-2.04883	0.43582	2.58781e-06	0.00013586
Zm00001d022322	798.475	-0.615224	0.191277	0.00129811	0.0172443
Zm00001d022340	299.624	0.924132	0.26355	0.000454091	0.00791646
Zm00001d022343	423.063	-0.781872	0.22223	0.000434321	0.00765303
Zm00001d022390	74.5953	2.12643	0.645752	0.000991405	0.0142363
Zm00001d022396	427.282	1.3483	0.277504	1.18184e-06	7.17164e-05
Zm00001d022415	1163.28	-0.53775	0.186071	0.00385206	0.0384832
Zm00001d022421	9342.52	0.900732	0.200949	7.38077e-06	0.000311987
Zm00001d022434	1332.55	-1.07909	0.160898	1.99155e-11	6.02574e-09
Zm00001d022440	1309.92	-0.716809	0.210745	0.000670646	0.0107152
Zm00001d022443	122.74	-1.13706	0.354228	0.00132756	0.0175452
Zm00001d022461	2126.39	-0.74612	0.225627	0.000943439	0.013727
Zm00001d022465	223.551	0.858462	0.279196	0.00210665	0.0249575
Zm00001d022467	65.7101	1.85936	0.51691	0.000321832	0.0061212
Zm00001d022468	219.575	1.27631	0.302818	2.50018e-05	0.000813177
Zm00001d022473	267.459	1.12458	0.290036	0.000105581	0.00258832
Zm00001d022485	84.7092	1.40708	0.440029	0.00138523	0.0180575
Zm00001d022494	5091.23	-0.536135	0.155369	0.000559091	0.00932968
Zm00001d022510	875	0.597901	0.193212	0.00197126	0.0236482
Zm00001d022525	428.412	-0.698816	0.234143	0.00283972	0.0312151
Zm00001d022545	381.467	-0.729497	0.239104	0.00228114	0.0263698
Zm00001d022569	1553.03	-0.884129	0.181341	1.08536e-06	6.69109e-05
Zm00001d022586	1428.26	-0.610871	0.160589	0.000142417	0.00330413
Zm00001d022594	754.364	-1.06058	0.183321	7.23598e-09	9.73049e-07
Zm00001d022708	20.1929	2.8757	0.940172	0.00222303	0.0259225
Zm00001d022861	46.0994	-2.25817	0.613681	0.00023349	0.0047984
Zm00001d022937	378.249	0.976548	0.242527	5.66021e-05	0.00158149
Zm00001d022952	16.476	-3.41785	1.06764	0.00136805	0.0179016
Zm00001d022981	11.9706	-7.11996	1.78435	6.60112e-05	0.00178947
Zm00001d023230	1387.92	-0.843518	0.165593	3.50749e-07	2.56047e-05
Zm00001d023243	12240	-0.849638	0.184872	4.31072e-06	0.000205228
Zm00001d023279	139.474	3.04562	0.379179	9.57761e-16	7.10442e-13
Zm00001d023283	103.716	1.83141	0.40387	5.76982e-06	0.00025564
Zm00001d023299	780.906	0.604041	0.201132	0.00267149	0.0297486
Zm00001d023340	281.758	-0.749302	0.25285	0.00304241	0.0327989
Zm00001d023342	284.828	0.797475	0.262137	0.00234848	0.0268673
Zm00001d023367	1345.37	-0.62522	0.159525	8.88227e-05	0.00226188
Zm00001d023387	206.188	1.38217	0.293408	2.46826e-06	0.000131384
Zm00001d023426	194.51	0.8637	0.297932	0.00374376	0.0378036
Zm00001d023445	904.416	-0.716284	0.177393	5.39484e-05	0.00153343
Zm00001d023452	2611.92	-0.701293	0.151836	3.86077e-06	0.000187358
Zm00001d023462	259.16	1.02404	0.298411	0.000599941	0.00985935
Zm00001d023492	170.818	1.01202	0.32387	0.00177939	0.0218945
Zm00001d023530	146.77	1.34172	0.347424	0.00011251	0.00272621
Zm00001d023577	171.33	1.18818	0.333694	0.000369892	0.0067991
Zm00001d023580	765.671	-0.569763	0.199088	0.00421157	0.0410662
Zm00001d023583	358.417	-0.741831	0.229302	0.00121567	0.0164825
Zm00001d023630	63.3966	1.40761	0.505022	0.00531614	0.0483946
Zm00001d023636	446.711	0.825134	0.222179	0.000204152	0.00431806
Zm00001d023664	3303.26	-0.596521	0.179701	0.000901689	0.0132787
Zm00001d023689	188.942	0.837874	0.296796	0.00475672	0.0447915
Zm00001d023718	8557.65	-0.604063	0.194923	0.00194186	0.0234154
Zm00001d023732	179.237	1.41978	0.321016	9.74479e-06	0.000390386
Zm00001d023757	18.2485	3.14183	0.976539	0.001294	0.0172004
Zm00001d023779	51.7287	1.76478	0.561998	0.00168839	0.0210089
Zm00001d023796	508.742	0.735186	0.214246	0.00060023	0.00985935
Zm00001d023802	4542.43	-0.985651	0.138943	1.30383e-12	5.25994e-10
Zm00001d023810	113.151	1.27466	0.407899	0.00177849	0.0218945
Zm00001d023839	163.94	1.87491	0.320049	4.67928e-09	6.60123e-07
Zm00001d023841	81.5831	1.45642	0.442211	0.000989511	0.0142325
Zm00001d023868	855.548	-0.615892	0.181769	0.00070324	0.0110988
Zm00001d023901	506.689	1.16484	0.267038	1.28838e-05	0.000488076
Zm00001d023919	398.305	-0.799291	0.231827	0.000565197	0.00941791
Zm00001d023969	44.7867	2.08112	0.610593	0.000653564	0.0105243
Zm00001d024009	2619.49	-0.890422	0.158625	1.98419e-08	2.23659e-06
Zm00001d024094	428.307	2.7028	0.257601	9.38116e-26	2.39689e-22
Zm00001d024102	271.658	-0.90826	0.25302	0.000331091	0.00626105
Zm00001d024128	130.944	3.99938	0.443165	1.80402e-19	2.30464e-16
Zm00001d024194	542.968	0.970416	0.264269	0.000240583	0.00491315
Zm00001d024200	42.9608	-2.41496	0.626743	0.000116589	0.00280436
Zm00001d024239	927.337	-0.681221	0.203303	0.000805865	0.0122559
Zm00001d024302	21828.9	1.02706	0.163215	3.12032e-10	6.89921e-08
Zm00001d024303	11704	0.985564	0.190594	2.32839e-07	1.83528e-05
Zm00001d024338	3116.45	-0.705523	0.144599	1.06527e-06	6.58491e-05
Zm00001d024343	2499.79	-0.716937	0.15158	2.24782e-06	0.000122776
Zm00001d024353	1415.99	-1.77997	0.180369	5.70192e-23	1.00858e-19
Zm00001d024414	788.718	0.785503	0.24415	0.00129405	0.0172004
Zm00001d024420	204.342	0.830223	0.288906	0.00405727	0.0398372
Zm00001d024425	3155.68	-0.559365	0.173132	0.0012342	0.0166552
Zm00001d024450	76.7674	-1.73186	0.44722	0.000107723	0.00262127
Zm00001d024458	11.0829	4.32076	1.46119	0.00310626	0.0332534
Zm00001d024509	85.1536	1.59773	0.465179	0.000593286	0.00977964
Zm00001d024516	906.328	0.723652	0.211184	0.000611092	0.00996405
Zm00001d024518	1422.02	0.554179	0.173348	0.00138906	0.0180766
Zm00001d024519	224.227	0.849567	0.28922	0.00330928	0.0346052
Zm00001d024527	187.539	-0.953361	0.296177	0.00128686	0.0171678
Zm00001d024533	1014.13	-0.503567	0.177174	0.00448015	0.0429749
Zm00001d024541	44.7919	2.50905	0.628178	6.49235e-05	0.00176676
Zm00001d024543	696.984	-0.710593	0.21586	0.000995044	0.0142561
Zm00001d024572	710.564	-1.19277	0.192016	5.23673e-10	1.07517e-07
Zm00001d024583	2431.59	-0.559794	0.150797	0.000205439	0.00433799
Zm00001d024588	254.503	1.07739	0.277255	0.000101947	0.00252615
Zm00001d024598	36.466	2.11738	0.647163	0.00106873	0.0149941
Zm00001d024612	646.669	1.01813	0.207271	9.01192e-07	5.662e-05
Zm00001d024625	190.08	1.01826	0.328571	0.00194137	0.0234154
Zm00001d024632	70.5351	2.22204	0.49089	5.99522e-06	0.0002641
Zm00001d024702	920.174	-0.608682	0.183568	0.000913671	0.0133906
Zm00001d024703	1051.03	-0.615668	0.174779	0.000427416	0.00756034
Zm00001d024710	352.49	0.784308	0.230326	0.000661122	0.0106015
Zm00001d024711	222.367	1.21075	0.377824	0.00135278	0.0177552
Zm00001d024755	1192.19	-0.570859	0.172763	0.000952156	0.0138138
Zm00001d024771	132.126	1.23876	0.36857	0.000776639	0.0119257
Zm00001d024778	7474.72	-0.544078	0.178841	0.00234826	0.0268673
Zm00001d024830	410.331	-0.779108	0.224663	0.000524538	0.00886242
Zm00001d024839	128.69	1.22344	0.354976	0.000567801	0.00943395
Zm00001d024876	762.653	-0.955905	0.189423	4.50216e-07	3.17568e-05
Zm00001d024908	2367.85	-0.588891	0.158494	0.000202778	0.00430155
Zm00001d024928	193.424	1.05966	0.302323	0.000456503	0.00795249
Zm00001d024939	193.964	1.26754	0.295927	1.84153e-05	0.000650478
Zm00001d024966	168.164	1.14959	0.308904	0.000198044	0.004228
Zm00001d024973	27.2177	3.40005	0.854109	6.8678e-05	0.00184277
Zm00001d024975	34.8926	2.58834	0.683366	0.000152086	0.00346258
Zm00001d025021	96.0004	1.20393	0.399168	0.00256039	0.0288043
Zm00001d025023	184.298	1.05645	0.339952	0.00188583	0.0228717
Zm00001d025043	36.9971	2.85238	0.673518	2.28508e-05	0.000769333
Zm00001d025055	777.187	-0.739077	0.191414	0.000112859	0.0027289
Zm00001d025081	1540.86	-1.21744	0.215708	1.66211e-08	1.95013e-06
Zm00001d025082	302.772	2.05079	0.322416	2.00825e-10	4.7608e-08
Zm00001d025103	435.731	0.96966	0.273026	0.000382996	0.00697859
Zm00001d025126	77.4631	1.76033	0.443459	7.2006e-05	0.00191863
Zm00001d025131	695.77	-0.530432	0.190389	0.00533562	0.0484185
Zm00001d025134	1004.16	-0.588169	0.183477	0.0013474	0.0177251
Zm00001d025149	167.637	1.58523	0.341374	3.42258e-06	0.000169983
Zm00001d025166	1668.33	-0.526701	0.178289	0.00313488	0.0334508
Zm00001d025182	201.405	1.12903	0.296501	0.000140187	0.00325947
Zm00001d025229	350.587	1.01594	0.294764	0.000567627	0.00943395
Zm00001d025234	263.193	2.13245	0.292429	3.04961e-13	1.34857e-10
Zm00001d025240	4169.2	-0.767172	0.137424	2.37033e-08	2.60793e-06
Zm00001d025300	1568.46	-0.709404	0.156104	5.50827e-06	0.000246603
Zm00001d025343	26.0383	-2.79428	0.843125	0.000919055	0.0134475
Zm00001d025401	412.205	0.738889	0.24068	0.00214057	0.0252422
Zm00001d025406	273.372	1.15559	0.281247	3.97671e-05	0.00118759
Zm00001d025437	66.5313	1.57535	0.491106	0.00133777	0.0176388
Zm00001d025524	73.4371	1.90613	0.50233	0.000147892	0.00338722
Zm00001d025551	2487.73	-0.556673	0.152293	0.0002569	0.00513243
Zm00001d025566	580.253	-0.928944	0.230559	5.59906e-05	0.00157205
Zm00001d025575	166.87	0.977626	0.314044	0.00185178	0.0225898
Zm00001d025580	193.536	0.85092	0.297168	0.00419079	0.0409028
Zm00001d025586	60.8939	1.83866	0.520025	0.000406673	0.00730332
Zm00001d025617	4239.48	-0.665606	0.165726	5.91159e-05	0.0016319
Zm00001d025652	467.082	-0.969663	0.214447	6.13486e-06	0.00026718
Zm00001d025659	151.752	1.14958	0.334404	0.000586713	0.00968519
Zm00001d025692	984.734	-0.59864	0.199119	0.00264329	0.0295203
Zm00001d025762	90.3694	1.53034	0.437924	0.000474878	0.0081674
Zm00001d025801	6750.59	-0.640615	0.139947	4.70431e-06	0.000219869
Zm00001d025803	431.961	-1.12703	0.227775	7.49867e-07	4.8297e-05
Zm00001d025817	1323.85	-0.587987	0.164062	0.000338459	0.00636225
Zm00001d025833	2962	1.45326	0.213131	9.19218e-12	2.9771e-09
Zm00001d025847	1327.91	-0.840362	0.181949	3.86227e-06	0.000187358
Zm00001d025857	358.08	0.863892	0.240356	0.000325361	0.006173
Zm00001d025860	560.512	-1.30991	0.237462	3.46253e-08	3.7033e-06
Zm00001d025862	967.504	-0.842159	0.179849	2.83289e-06	0.000145732
Zm00001d025872	316.426	-1.11621	0.246685	6.04387e-06	0.000264722
Zm00001d025889	82.9979	-1.54404	0.458319	0.000754633	0.0116775
Zm00001d025932	612.614	-1.23557	0.202845	1.12062e-09	1.91685e-07
Zm00001d025980	197.441	1.25777	0.311179	5.30102e-05	0.00151237
Zm00001d025997	436.983	-0.615538	0.214807	0.00416307	0.0406669
Zm00001d026050	300.74	-0.820149	0.258862	0.00153338	0.019589
Zm00001d026129	58.796	1.74183	0.521531	0.000838257	0.0126233
Zm00001d026139	156.679	-0.98166	0.331723	0.00308363	0.0330925
Zm00001d026265	2124.1	-0.513217	0.151361	0.00069718	0.0110441
Zm00001d026267	781.974	-0.794738	0.182724	1.36521e-05	0.000508801
Zm00001d026269	1251.89	-0.526931	0.168564	0.00177206	0.021849
Zm00001d026271	1499.59	-0.774203	0.185984	3.14463e-05	0.000979822
Zm00001d026291	374.051	1.10813	0.338731	0.00107016	0.0149959
Zm00001d026317	563.269	1.02259	0.214027	1.7717e-06	0.000100099
Zm00001d026335	716.189	-0.757259	0.232865	0.00114624	0.0157642
Zm00001d026339	54.1638	2.39894	0.551492	1.3619e-05	0.000508801
Zm00001d026341	49.5623	1.89741	0.558268	0.00067697	0.0107825
Zm00001d026368	975.555	-0.523544	0.174782	0.00274079	0.0303878
Zm00001d026375	23.2934	2.29052	0.818902	0.0051569	0.0475854
Zm00001d026402	862.625	-0.754579	0.200341	0.000165564	0.00370705
Zm00001d026438	40.2672	1.77217	0.637045	0.00540478	0.048854
Zm00001d026439	5743.65	-0.800251	0.138086	6.82033e-09	9.28008e-07
Zm00001d026475	1175.51	-0.581835	0.189337	0.00211909	0.025054
Zm00001d026486	25.5259	2.43932	0.784525	0.00187532	0.0227922
Zm00001d026487	93.8256	1.13715	0.407935	0.00531057	0.0483677
Zm00001d026490	547.565	1.18759	0.231436	2.87574e-07	2.21905e-05
Zm00001d026500	230.913	-1.76846	0.290802	1.19191e-09	1.98608e-07
Zm00001d026528	711.704	-0.721284	0.218725	0.000974917	0.0140906
Zm00001d026573	338.343	0.863156	0.240259	0.00032738	0.00620108
Zm00001d026619	296.575	0.880042	0.275831	0.00142024	0.0184215
Zm00001d026632	5332.48	-0.735082	0.167224	1.10376e-05	0.000432384
Zm00001d026635	816.477	-1.38726	0.188016	1.60197e-13	7.22301e-11
Zm00001d026638	218.464	0.900203	0.310111	0.0036979	0.0375423
Zm00001d026650	85.3803	-1.59602	0.434825	0.000242101	0.00493539
Zm00001d026677	371.946	0.85153	0.238539	0.000357295	0.00660981
Zm00001d026703	1214.48	-0.662635	0.173055	0.00012864	0.00304609
Zm00001d026854	440.023	-1.60956	0.222934	5.20382e-13	2.17567e-10
Zm00001d027011	237.367	0.943963	0.285464	0.000943784	0.013727
Zm00001d027231	1973.44	0.980128	0.161959	1.43337e-09	2.29088e-07
Zm00001d027258	636.268	1.02412	0.208367	8.8794e-07	5.59402e-05
Zm00001d027281	372.427	0.951608	0.32279	0.00319761	0.0338064
Zm00001d027295	1133.49	0.999332	0.20091	6.55759e-07	4.39626e-05
Zm00001d027299	1102.85	-0.554878	0.169963	0.00109577	0.0152804
Zm00001d027302	673.341	-0.937217	0.189138	7.22569e-07	4.73376e-05
Zm00001d027329	1036.77	-0.662391	0.187971	0.000425241	0.00753926
Zm00001d027332	1017.42	0.970678	0.206022	2.45868e-06	0.000131254
Zm00001d027335	108.075	1.18545	0.41602	0.00437881	0.0422715
Zm00001d027355	241.274	1.38658	0.277829	6.01442e-07	4.1039e-05
Zm00001d027362	636.351	-0.650575	0.212524	0.00220468	0.0258129
Zm00001d027383	877.61	0.876453	0.192404	5.23184e-06	0.00023729
Zm00001d027387	878.327	1.01118	0.198012	3.27922e-07	2.45621e-05
Zm00001d027412	2333.71	-0.554499	0.152855	0.000286057	0.00557921
Zm00001d027423	460.617	0.935442	0.255912	0.000256851	0.00513243
Zm00001d027454	282.826	1.25809	0.34802	0.00030037	0.00582378
Zm00001d027461	1525.01	-0.544286	0.187371	0.00367425	0.0373516
Zm00001d027479	287.065	0.820213	0.248796	0.000978192	0.0141062
Zm00001d027500	17442.6	-0.737917	0.142844	2.39274e-07	1.87146e-05
Zm00001d027514	4152.12	-0.895902	0.142455	3.19464e-10	6.99625e-08
Zm00001d027576	239.256	0.775222	0.266493	0.0036261	0.0370202
Zm00001d027612	1737.62	-0.512191	0.175029	0.00343001	0.0354965
Zm00001d027624	1510.55	-0.765854	0.197547	0.000105835	0.00259177
Zm00001d027625	4198.55	0.502295	0.16943	0.00303064	0.0327192
Zm00001d027673	408.962	-1.22104	0.270917	6.57354e-06	0.000284133
Zm00001d027722	646.826	-0.588722	0.20526	0.00412855	0.0403811
Zm00001d027731	22643.6	-1.24469	0.135781	4.8688e-20	6.99737e-17
Zm00001d027742	369.576	-0.696776	0.233749	0.00287424	0.0314728
Zm00001d027743	364.628	-0.814036	0.234068	0.0005056	0.00857395
Zm00001d027755	132.452	1.17846	0.363421	0.00118406	0.0161502
Zm00001d027760	1147.16	1.01842	0.167542	1.21261e-09	2.00604e-07
Zm00001d027801	231.596	1.38221	0.294278	2.64051e-06	0.000137797
Zm00001d027812	1034.15	0.599935	0.174183	0.000572588	0.00949291
Zm00001d027816	220.582	-1.16504	0.278192	2.81567e-05	0.000898009
Zm00001d027862	280.845	-1.4671	0.334969	1.18783e-05	0.000458845
Zm00001d027907	328.304	-1.6533	0.280839	3.93264e-09	5.75994e-07
Zm00001d027936	1257.72	-0.84918	0.163565	2.0839e-07	1.66966e-05
Zm00001d027965	630.353	1.39442	0.295721	2.41305e-06	0.000129949
Zm00001d027969	823.807	-0.546484	0.178744	0.00223299	0.0259856
Zm00001d027991	81.7887	1.25376	0.439291	0.00431669	0.0417946
Zm00001d028004	121.385	1.29411	0.417949	0.00195925	0.0235921
Zm00001d028020	1252.74	-0.630478	0.175957	0.000339486	0.00637263
Zm00001d028024	827.264	-0.661396	0.178919	0.000218484	0.00454665
Zm00001d028054	1673.18	-0.537927	0.186152	0.00385587	0.0385001
Zm00001d028071	944.345	-0.906151	0.191791	2.3049e-06	0.000125595
Zm00001d028093	440.095	0.754207	0.243135	0.00192212	0.0232457
Zm00001d028119	240.914	1.29628	0.275317	2.49745e-06	0.00013263
Zm00001d028140	521.849	0.627596	0.222223	0.00474029	0.0446551
Zm00001d028168	51.1626	1.83738	0.553355	0.000898778	0.0132488
Zm00001d028193	769.475	-0.5835	0.183214	0.00144856	0.0187132
Zm00001d028201	14232.4	-0.719331	0.145023	7.04525e-07	4.62873e-05
Zm00001d028210	210.342	1.53971	0.344004	7.61113e-06	0.000320546
Zm00001d028213	864.451	-0.656551	0.176625	0.000201439	0.00428104
Zm00001d028217	175.642	-2.17349	0.417229	1.89514e-07	1.54535e-05
Zm00001d028244	1322.1	-0.608928	0.181409	0.000788921	0.012062
Zm00001d028296	526.136	-0.583342	0.201207	0.003741	0.0377962
Zm00001d028299	792.895	0.843504	0.203864	3.51001e-05	0.00107188
Zm00001d028337	215.663	1.34418	0.29954	7.2074e-06	0.000306915
Zm00001d028358	112.034	1.09925	0.369415	0.00292371	0.0318478
Zm00001d028367	615.445	-0.71903	0.228386	0.00164214	0.0205895
Zm00001d028368	4747.03	-0.509995	0.155035	0.00100351	0.01435
Zm00001d028370	973.374	-0.842786	0.192482	1.19493e-05	0.000460258
Zm00001d028375	915.556	-0.589462	0.200014	0.00320771	0.033882
Zm00001d028397	872.915	-0.675492	0.189976	0.000377018	0.00689152
Zm00001d028398	161.403	1.1095	0.326117	0.000668539	0.010698
Zm00001d028399	27.7314	2.17369	0.736919	0.00318085	0.0336944
Zm00001d028404	141.702	-1.85284	0.394801	2.69095e-06	0.00013968
Zm00001d028412	2092.01	-0.631842	0.156498	5.40482e-05	0.00153437
Zm00001d028428	409.486	-1.39834	0.222609	3.35111e-10	7.13507e-08
Zm00001d028436	1377.87	-0.582243	0.159088	0.00025233	0.00507196
Zm00001d028437	13.1578	4.00004	1.31025	0.00226659	0.0262836
Zm00001d028452	1314.98	-0.940721	0.191229	8.68306e-07	5.50047e-05
Zm00001d028474	847.716	1.49387	0.218555	8.18783e-12	2.72868e-09
Zm00001d028490	1402.97	-0.657375	0.167681	8.84065e-05	0.00225378
Zm00001d028509	3122.89	-0.546288	0.146724	0.000196691	0.00420344
Zm00001d028538	300.674	0.715773	0.250678	0.00429893	0.0416754
Zm00001d028543	957.034	-1.07695	0.177029	1.17607e-09	1.97399e-07
Zm00001d028566	1043.18	-0.775614	0.175314	9.68318e-06	0.000389274
Zm00001d028568	3747.7	-0.543518	0.153528	0.000399848	0.00721704
Zm00001d028586	1243.85	-0.555561	0.167212	0.000892177	0.0131848
Zm00001d028597	813.102	-0.538248	0.179878	0.00276894	0.0306261
Zm00001d028603	647.434	-0.637378	0.190016	0.000795551	0.0121311
Zm00001d028612	1700.82	-0.631575	0.158278	6.59917e-05	0.00178947
Zm00001d028620	475.386	0.673008	0.215327	0.00177497	0.0218732
Zm00001d028647	2348.08	0.951362	0.20236	2.58476e-06	0.00013586
Zm00001d028669	149.914	1.91263	0.358313	9.40436e-08	8.89931e-06
Zm00001d028714	982.706	-0.748592	0.232247	0.0012674	0.0169807
Zm00001d028726	2183.96	-0.639743	0.181426	0.000421582	0.00750332
Zm00001d028748	1095.03	-0.540165	0.169394	0.00142862	0.0185181
Zm00001d028762	663.117	-0.701238	0.191032	0.000241797	0.00493355
Zm00001d028785	245.335	-1.03944	0.305615	0.000671011	0.0107152
Zm00001d028801	1542.87	-0.520251	0.163512	0.00146399	0.0188807
Zm00001d028815	79.4111	1.70632	0.522179	0.0010843	0.0151756
Zm00001d028838	2235.21	-0.864493	0.169891	3.60864e-07	2.61769e-05
Zm00001d028863	121.919	1.32361	0.373387	0.000392811	0.0071292
Zm00001d028867	720.803	-0.75903	0.201675	0.000167465	0.00374232
Zm00001d028873	394.737	1.02387	0.298527	0.000604183	0.00988774
Zm00001d028947	61.888	1.5739	0.530614	0.00301516	0.0326148
Zm00001d028949	243.884	1.15956	0.330888	0.000457673	0.00796393
Zm00001d028974	1071.17	-0.513626	0.177905	0.00388838	0.0386366
Zm00001d028986	264.201	1.28671	0.291749	1.03203e-05	0.000412005
Zm00001d028998	8410.28	0.851626	0.164738	2.34631e-07	1.84141e-05
Zm00001d029020	1887.63	-0.838804	0.16589	4.27289e-07	3.02324e-05
Zm00001d029035	223.258	0.827621	0.276007	0.00271263	0.0301338
Zm00001d029039	394.232	-0.636657	0.221282	0.00401303	0.0395032
Zm00001d029066	1350.28	0.607838	0.162317	0.000180565	0.0039319
Zm00001d029096	156.41	2.08256	0.338033	7.23706e-10	1.36407e-07
Zm00001d029134	656.311	-1.03397	0.198953	2.02481e-07	1.63946e-05
Zm00001d029151	751.778	-0.870249	0.225362	0.000112666	0.00272711
Zm00001d029165	444.981	-0.706876	0.220173	0.00132478	0.0175279
Zm00001d029173	3321.61	-0.543968	0.163825	0.000898811	0.0132488
Zm00001d029238	207.618	0.980901	0.288612	0.000677099	0.0107825
Zm00001d029246	55.414	-2.30232	0.528933	1.34436e-05	0.000504298
Zm00001d029272	1096.37	-0.530039	0.17786	0.00288157	0.0315232
Zm00001d029281	663.519	-0.647011	0.191803	0.000742706	0.0115787
Zm00001d029333	1009.97	-1.19681	0.20379	4.28606e-09	6.19861e-07
Zm00001d029342	941.864	-0.534684	0.177804	0.00263702	0.0294933
Zm00001d029366	759.183	0.892202	0.206731	1.59056e-05	0.00057689
Zm00001d029371	1175.92	-0.842575	0.174532	1.38175e-06	8.08482e-05
Zm00001d029394	3605.47	-0.53116	0.140797	0.000161598	0.00363158
Zm00001d029419	583.175	-0.739715	0.197585	0.000181272	0.00394358
Zm00001d029422	2277.93	-0.566037	0.156802	0.000306341	0.00590469
Zm00001d029424	496.04	-0.713648	0.217115	0.00101275	0.0144289
Zm00001d029455	264.19	0.846545	0.268758	0.00163361	0.0205048
Zm00001d029457	5640.9	-0.516243	0.15521	0.000880756	0.0131172
Zm00001d029546	46.4309	3.52477	0.655025	7.40207e-08	7.24301e-06
Zm00001d029594	570.519	0.889075	0.217367	4.30986e-05	0.00126895
Zm00001d029638	11.1103	-4.5039	1.60175	0.00492547	0.0459478
Zm00001d029639	14.3274	-3.84315	1.20052	0.00136843	0.0179016
Zm00001d029684	1142.39	-0.737171	0.169868	1.42702e-05	0.000527559
Zm00001d029688	104.707	1.17964	0.404066	0.00350686	0.0360484
Zm00001d029699	273.381	1.55428	0.2598	2.1961e-09	3.43532e-07
Zm00001d029711	33.9678	-2.19965	0.661742	0.00088725	0.0131628
Zm00001d029714	691.718	-1.1634	0.188551	6.81931e-10	1.30675e-07
Zm00001d029777	335.812	1.71642	0.263923	7.84748e-11	2.09829e-08
Zm00001d029778	7151.93	1.3197	0.446556	0.00312379	0.0333945
Zm00001d029782	1816.23	-0.666103	0.152008	1.17579e-05	0.000455173
Zm00001d029801	84.0369	1.34521	0.465144	0.00382773	0.038319
Zm00001d029835	219.123	1.03329	0.30985	0.000853606	0.0127957
Zm00001d029840	27.5368	2.17499	0.779647	0.00527551	0.0481547
Zm00001d029888	84.862	1.4662	0.434228	0.000733931	0.0114756
Zm00001d029899	899.509	0.69013	0.184046	0.000177002	0.00388308
Zm00001d029937	134.269	-1.52506	0.344331	9.46551e-06	0.000386606
Zm00001d030020	2835.5	0.71233	0.152188	2.86045e-06	0.000146276
Zm00001d030051	1442.82	-0.682455	0.166061	3.9624e-05	0.00118611
Zm00001d030069	521.756	0.880569	0.20537	1.80522e-05	0.000641591
Zm00001d030086	634.052	-0.705926	0.217722	0.00118554	0.0161502
Zm00001d030129	191.604	1.34903	0.311817	1.51592e-05	0.00055419
Zm00001d030214	414.726	-0.701793	0.223863	0.00171899	0.021286
Zm00001d030230	192.513	1.22545	0.309065	7.3391e-05	0.00194876
Zm00001d030231	392.718	-0.817842	0.227933	0.000333116	0.0062787
Zm00001d030361	31.2639	2.87298	0.792997	0.000291277	0.00566659
Zm00001d030391	97.0813	-1.68874	0.512852	0.000991802	0.0142363
Zm00001d030471	267.218	0.802704	0.268863	0.00283067	0.031159
Zm00001d030509	1199.62	0.545452	0.178328	0.00222305	0.0259225
Zm00001d030526	356.184	0.912197	0.243015	0.000174268	0.0038334
Zm00001d030530	217.166	0.946836	0.314882	0.00263879	0.0294988
Zm00001d030551	192.652	1.28291	0.336808	0.000139513	0.00325036
Zm00001d030556	127.489	1.06443	0.376268	0.00467052	0.0442699
Zm00001d030614	243.858	1.2129	0.325481	0.00019418	0.00416215
Zm00001d030741	462.107	-0.99224	0.223818	9.28243e-06	0.000380183
Zm00001d030765	93.061	1.1781	0.414194	0.00445061	0.0427796
Zm00001d030795	441.969	-0.653766	0.228091	0.00415356	0.0405912
Zm00001d030830	27.3389	2.28423	0.790855	0.00387327	0.038587
Zm00001d030855	30292.7	-0.660086	0.155647	2.22605e-05	0.000754986
Zm00001d030858	910.528	-0.939454	0.198099	2.11255e-06	0.000117056
Zm00001d030891	82.5884	1.65005	0.431687	0.0001322	0.00310832
Zm00001d030907	155.316	1.3494	0.389887	0.000538155	0.00902616
Zm00001d030915	394.927	-1.11711	0.236159	2.24164e-06	0.00012273
Zm00001d030937	436.382	-0.728386	0.220827	0.000972234	0.0140696
Zm00001d030953	484.656	-0.731587	0.211308	0.00053582	0.00900013
Zm00001d030968	2330.77	-0.724565	0.151998	1.87056e-06	0.000105425
Zm00001d030985	232.845	-0.838718	0.279507	0.00269354	0.0299361
Zm00001d030990	201.597	0.974126	0.299579	0.0011474	0.0157707
Zm00001d031002	1181.06	-0.505765	0.165447	0.00223592	0.0260066
Zm00001d031008	1458.21	-0.517835	0.158502	0.00108671	0.0152001
Zm00001d031009	774.415	0.57649	0.181893	0.00152763	0.0195371
Zm00001d031018	684.106	-0.521266	0.186728	0.00524508	0.0480138
Zm00001d031074	175.631	1.25336	0.33558	0.000187782	0.00405451
Zm00001d031077	37.7971	1.81335	0.62919	0.00395108	0.0390942
Zm00001d031118	619.089	1.53122	0.204199	6.4484e-14	3.15491e-11
Zm00001d031128	3688.58	0.561745	0.169395	0.000912555	0.0133828
Zm00001d031129	74.117	1.57118	0.473377	0.000903149	0.0132787
Zm00001d031149	304.26	-0.756648	0.243244	0.00186672	0.0227238
Zm00001d031191	231.93	2.02795	0.279763	4.20457e-13	1.82423e-10
Zm00001d031212	797.065	0.688909	0.220061	0.00174489	0.0215603
Zm00001d031258	1001.8	-0.520551	0.173143	0.00264292	0.0295203
Zm00001d031316	310.734	0.774784	0.245637	0.00160951	0.0202575
Zm00001d031332	655.134	1.02709	0.268253	0.000128758	0.00304609
Zm00001d031338	447.05	-0.793	0.274835	0.00390958	0.0387838
Zm00001d031349	219.958	-1.61283	0.383261	2.57454e-05	0.000833825
Zm00001d031429	2583.68	-0.596557	0.157891	0.000157916	0.00357002
Zm00001d031447	540.981	0.909189	0.266613	0.000649275	0.0104773
Zm00001d031485	278.307	1.85606	0.298458	5.00882e-10	1.03764e-07
Zm00001d031490	1559.09	-0.516921	0.16161	0.00138108	0.0180442
Zm00001d031555	325.773	1.33187	0.251616	1.20138e-07	1.08596e-05
Zm00001d031556	576.125	0.80638	0.212345	0.000146164	0.0033644
Zm00001d031570	2810.43	-0.958094	0.144281	3.12653e-11	8.76763e-09
Zm00001d031581	1035.85	-0.528866	0.16819	0.00166391	0.0207944
Zm00001d031587	274.851	-1.0515	0.263908	6.76672e-05	0.00181989
Zm00001d031611	1870.31	0.534793	0.160537	0.000864516	0.012934
Zm00001d031636	1601.87	1.29774	0.223073	5.97154e-09	8.27203e-07
Zm00001d031660	773.223	-0.753635	0.190612	7.69314e-05	0.00202639
Zm00001d031666	226.974	1.55074	0.312995	7.25039e-07	4.73644e-05
Zm00001d031677	367.002	0.933375	0.306617	0.0023337	0.0267418
Zm00001d031701	936.54	0.529262	0.188394	0.00496446	0.0462242
Zm00001d031705	438.381	0.67858	0.217823	0.00183771	0.0224658
Zm00001d031725	344.409	0.711372	0.256659	0.00557701	0.0499974
Zm00001d031727	92672.1	-0.545058	0.16556	0.000994033	0.0142542
Zm00001d031732	2082.32	-0.7289	0.187727	0.000103276	0.00255359
Zm00001d031808	131.695	1.0652	0.374355	0.004435	0.0426805
Zm00001d031909	73.7927	-2.90085	0.604686	1.60833e-06	9.15437e-05
Zm00001d031943	355.236	1.66022	0.268839	6.59435e-10	1.27885e-07
Zm00001d031971	517.602	1.51565	0.24947	1.23602e-09	2.03017e-07
Zm00001d032029	247.688	1.00474	0.300878	0.000839746	0.0126374
Zm00001d032030	673.016	-0.95061	0.24045	7.70294e-05	0.00202665
Zm00001d032056	391.086	-0.760409	0.221914	0.000611213	0.00996405
Zm00001d032057	1506.71	-0.693422	0.176559	8.58609e-05	0.00219375
Zm00001d032079	306.298	1.09733	0.267028	3.9666e-05	0.00118611
Zm00001d032091	92.1558	1.76599	0.423679	3.06967e-05	0.000960538
Zm00001d032095	1450.12	-1.99797	0.177882	2.83946e-29	1.63234e-25
Zm00001d032098	201.614	1.56578	0.364762	1.76588e-05	0.000630533
Zm00001d032102	1152.33	-0.605089	0.187732	0.00126792	0.0169807
Zm00001d032120	353.749	0.980283	0.242824	5.4138e-05	0.00153502
Zm00001d032130	71.9806	1.51394	0.456172	0.000904046	0.0132834
Zm00001d032146	160.357	-1.37541	0.321592	1.8953e-05	0.000664364
Zm00001d032186	3766.33	-0.910868	0.164048	2.81712e-08	3.0413e-06
Zm00001d032231	3593.44	-0.694177	0.150312	3.8702e-06	0.000187358
Zm00001d032264	350.9	-1.22061	0.292017	2.91615e-05	0.000920546
Zm00001d032266	154.507	1.04652	0.343351	0.00230396	0.0264839
Zm00001d032279	487.556	-0.904633	0.221504	4.42566e-05	0.00129972
Zm00001d032283	738.767	-0.763214	0.193086	7.72716e-05	0.00202838
Zm00001d032304	110.188	1.44762	0.373583	0.000106646	0.00260055
Zm00001d032307	76.5132	1.35859	0.454591	0.00280266	0.0309248
Zm00001d032338	886.088	-0.521059	0.186362	0.00517474	0.0476544
Zm00001d032339	492.341	-0.816663	0.22533	0.000289739	0.00564145
Zm00001d032362	720.615	-0.537614	0.19265	0.00526054	0.0481179
Zm00001d032383	12.7062	3.87293	1.33694	0.00376916	0.0379279
Zm00001d032386	4305.79	-0.842305	0.158307	1.03358e-07	9.70093e-06
Zm00001d032448	103.803	1.45288	0.412435	0.000427196	0.00756034
Zm00001d032449	1087.97	-0.724438	0.166811	1.40631e-05	0.000521581
Zm00001d032455	1525.04	-0.702181	0.185821	0.000157589	0.00356669
Zm00001d032460	448.683	-0.841219	0.267643	0.00167191	0.0208378
Zm00001d032501	1284.08	-0.523189	0.177872	0.0032676	0.0343726
Zm00001d032517	451.616	-1.50469	0.227994	4.11964e-11	1.13591e-08
Zm00001d032535	8831.66	-1.14508	0.143877	1.7378e-15	1.14174e-12
Zm00001d032552	298.543	-1.05481	0.24992	2.43686e-05	0.000802801
Zm00001d032560	575.421	0.885655	0.242096	0.00025392	0.00509501
Zm00001d032565	372.014	1.82299	0.282314	1.06576e-10	2.7849e-08
Zm00001d032603	1346.2	-0.617011	0.168235	0.000244883	0.00497446
Zm00001d032615	2650.03	-0.623675	0.145783	1.885e-05	0.000662777
Zm00001d032621	141.616	1.1993	0.362906	0.000950785	0.0138026
Zm00001d032631	102.886	1.52399	0.41977	0.000282823	0.00554188
Zm00001d032670	923.242	1.30662	0.209907	4.82387e-10	1.00841e-07
Zm00001d032722	80.6184	1.63279	0.439653	0.000204152	0.00431806
Zm00001d032805	57.1411	2.19961	0.529505	3.26583e-05	0.00100802
Zm00001d032815	226.444	0.803655	0.282756	0.00447999	0.0429749
Zm00001d032836	155.552	-1.09135	0.332551	0.00103168	0.0146388
Zm00001d032850	16.8082	7.43469	1.69074	1.09609e-05	0.000430113
Zm00001d032897	252.85	1.02659	0.292439	0.000447341	0.00781658
Zm00001d032950	701.072	0.737979	0.224352	0.0010041	0.01435
Zm00001d032992	370.511	-1.05013	0.237405	9.71694e-06	0.00038995
Zm00001d032999	66.2665	-2.52542	0.495566	3.4685e-07	2.54007e-05
Zm00001d033020	171.163	1.51992	0.323125	2.55355e-06	0.000134986
Zm00001d033039	180.601	1.04568	0.33521	0.00181181	0.0222437
Zm00001d033048	6166.99	-0.874005	0.171343	3.38031e-07	2.49249e-05
Zm00001d033094	746.09	-0.562626	0.18918	0.0029392	0.0319107
Zm00001d033097	236.782	-1.11693	0.291365	0.000126366	0.00300185
Zm00001d033108	3375.37	-0.695064	0.139969	6.84081e-07	4.55955e-05
Zm00001d033112	156.092	1.58471	0.405995	9.48973e-05	0.00237708
Zm00001d033158	343.849	1.12594	0.269381	2.91836e-05	0.000920546
Zm00001d033159	2080.98	-0.555506	0.156139	0.000374026	0.00685317
Zm00001d033174	4911.75	0.544081	0.150906	0.000311629	0.00597174
Zm00001d033187	615.787	-0.609747	0.192515	0.00153878	0.019647
Zm00001d033225	592.709	0.803889	0.232023	0.000530846	0.00892964
Zm00001d033233	101.781	-1.42215	0.408614	0.000500641	0.00851496
Zm00001d033234	129.504	2.06328	0.425979	1.27492e-06	7.59499e-05
Zm00001d033265	578.294	-0.810186	0.201379	5.74138e-05	0.00160028
Zm00001d033287	570.414	-0.816092	0.222398	0.000243021	0.00494975
Zm00001d033295	1212.39	-0.75441	0.172115	1.16959e-05	0.000454303
Zm00001d033316	254.258	1.1602	0.328494	0.000412646	0.00737853
Zm00001d033321	938.095	-0.549596	0.179593	0.00221165	0.025855
Zm00001d033333	83.9694	1.69537	0.437827	0.000107845	0.00262144
Zm00001d033339	158.974	-0.96166	0.318413	0.00252635	0.0284881
Zm00001d033365	206.9	0.814249	0.291148	0.00516296	0.0476031
Zm00001d033369	708.256	0.985115	0.201503	1.01436e-06	6.32119e-05
Zm00001d033385	325.94	0.815831	0.258185	0.00157841	0.0199755
Zm00001d033402	453.032	0.819592	0.214592	0.000133826	0.00314013
Zm00001d033420	525.034	0.591265	0.211026	0.00508093	0.0470354
Zm00001d033465	50.5399	2.19329	0.603117	0.000276266	0.005453
Zm00001d033483	1953.32	-0.790523	0.172602	4.64924e-06	0.000217738
Zm00001d033488	729.263	-0.859853	0.195867	1.13358e-05	0.000442557
Zm00001d033489	367.398	-0.857271	0.244636	0.000457853	0.00796393
Zm00001d033490	3459.92	-0.659669	0.166837	7.68616e-05	0.00202639
Zm00001d033552	577.822	1.27675	0.237767	7.88523e-08	7.61852e-06
Zm00001d033559	270.6	0.804283	0.25446	0.00157366	0.0199374
Zm00001d033580	1191.09	-1.02093	0.223556	4.95218e-06	0.000229588
Zm00001d033606	270.012	-0.768193	0.264288	0.00365321	0.0372035
Zm00001d033612	7279.41	0.921879	0.195328	2.36263e-06	0.000128032
Zm00001d033623	868.793	1.12688	0.222351	4.01932e-07	2.87032e-05
Zm00001d033633	1592.96	-0.610844	0.167123	0.000257134	0.00513264
Zm00001d033637	43.3856	1.62969	0.584931	0.00533428	0.0484185
Zm00001d033654	1885.13	-0.90308	0.155378	6.1672e-09	8.4919e-07
Zm00001d033683	188.966	1.29211	0.360068	0.000332571	0.00627356
Zm00001d033704	651.757	-0.588282	0.19369	0.0023876	0.0272606
Zm00001d033747	2268.48	0.645719	0.175687	0.00023748	0.00486707
Zm00001d033750	1908.53	-0.817825	0.16485	7.01169e-07	4.61988e-05
Zm00001d033837	202.202	0.990348	0.29694	0.00085243	0.0127865
Zm00001d033840	622.246	-0.879907	0.208553	2.4527e-05	0.000805714
Zm00001d033846	1135.48	-0.829299	0.19604	2.33428e-05	0.000777923
Zm00001d033855	211.204	0.8753	0.286956	0.00228621	0.026378
Zm00001d033879	476.416	-0.827748	0.213224	0.000103578	0.00255802
Zm00001d033884	53.9332	3.34346	0.635792	1.45056e-07	1.25985e-05
Zm00001d033906	1605.7	-1.00873	0.20791	1.22372e-06	7.32798e-05
Zm00001d033910	622.722	-1.02231	0.199997	3.19449e-07	2.40843e-05
Zm00001d033917	3194.34	-0.613884	0.148985	3.78157e-05	0.00113967
Zm00001d033924	902.53	-0.767166	0.251486	0.00228435	0.0263698
Zm00001d033932	676.048	-0.593186	0.208156	0.00437588	0.0422715
Zm00001d033937	3246.91	-1.14745	0.165174	3.73431e-12	1.34119e-09
Zm00001d033945	1067.57	1.04164	0.222945	2.97995e-06	0.000151602
Zm00001d033951	29.1964	2.46321	0.740554	0.000880475	0.0131172
Zm00001d033957	138.242	1.58113	0.417262	0.000151066	0.00344277
Zm00001d033995	102.227	1.19142	0.426323	0.00519564	0.0477895
Zm00001d034003	156.895	1.71905	0.372933	4.03543e-06	0.000194538
Zm00001d034027	2140.98	1.08557	0.181803	2.35618e-09	3.63627e-07
Zm00001d034030	153.138	0.951909	0.342924	0.00550557	0.049492
Zm00001d034039	130.531	1.25231	0.354246	0.00040755	0.00731016
Zm00001d034062	1850.2	-0.515072	0.173566	0.00300144	0.0324944
Zm00001d034074	8929.32	-0.642073	0.149226	1.68732e-05	0.000607196
Zm00001d034076	191.63	1.65542	0.345628	1.67105e-06	9.48787e-05
Zm00001d034097	35.946	2.41908	0.751698	0.00129016	0.0171774
Zm00001d034103	31.9515	2.21396	0.753033	0.00328154	0.0344508
Zm00001d034139	325.199	0.833526	0.253841	0.00102471	0.0145542
Zm00001d034161	962.527	-0.637646	0.173423	0.000236165	0.00484875
Zm00001d034169	13.8926	-3.78194	1.23592	0.00221313	0.0258593
Zm00001d034172	343.511	-0.943273	0.283479	0.000876348	0.013077
Zm00001d034256	3041.49	-0.624659	0.15341	4.66462e-05	0.00135776
Zm00001d034319	707.872	0.748428	0.212363	0.000424636	0.00753434
Zm00001d034341	225.555	0.974261	0.277408	0.000444734	0.00778877
Zm00001d034356	258.576	1.12259	0.260631	1.65333e-05	0.000595898
Zm00001d034359	58.5653	1.73445	0.521684	0.000885108	0.0131612
Zm00001d034366	820.128	-0.600538	0.184958	0.00116677	0.0159701
Zm00001d034372	124.27	1.31354	0.353128	0.000199439	0.00424496
Zm00001d034380	853.917	-1.2279	0.219661	2.27059e-08	2.52233e-06
Zm00001d034388	131.865	1.15777	0.351029	0.000972986	0.0140716
Zm00001d034405	290.565	1.46407	0.313792	3.07507e-06	0.000156095
Zm00001d034433	308.36	0.954852	0.253119	0.000161719	0.00363158
Zm00001d034443	257.291	-0.866884	0.263794	0.00101545	0.0144494
Zm00001d034452	679.226	-0.578195	0.199882	0.00381967	0.0382883
Zm00001d034508	70.884	1.51611	0.480914	0.00161846	0.020348
Zm00001d034523	103.407	-1.35832	0.411397	0.000960898	0.0139318
Zm00001d034547	613.944	0.668681	0.193921	0.000564316	0.00941004
Zm00001d034577	356.091	1.96658	0.260663	4.53997e-14	2.26949e-11
Zm00001d034597	1593.07	-0.5047	0.159276	0.00153115	0.0195713
Zm00001d034606	880.905	-0.770605	0.176227	1.2266e-05	0.00046931
Zm00001d034618	1165.11	-0.527826	0.171763	0.00211929	0.025054
Zm00001d034621	320.822	1.45758	0.293646	6.91443e-07	4.58205e-05
Zm00001d034638	1390.19	-0.603688	0.162017	0.000194484	0.00416215
Zm00001d034650	730.359	-0.636915	0.194605	0.00106465	0.0149505
Zm00001d034662	660.906	-0.617058	0.188467	0.00106006	0.0149169
Zm00001d034663	348.363	0.705849	0.251243	0.00496299	0.0462242
Zm00001d034688	230.999	0.844221	0.28721	0.00328861	0.0344832
Zm00001d034705	89.7625	1.23921	0.411892	0.00262479	0.0293994
Zm00001d034714	608.575	-0.63982	0.209929	0.00230529	0.0264839
Zm00001d034719	544.001	-0.638179	0.21982	0.00369384	0.0375269
Zm00001d034730	1155.39	-0.642248	0.182277	0.000425924	0.00754554
Zm00001d034733	354.343	0.879093	0.236562	0.000202302	0.00429541
Zm00001d034751	1723.23	0.77533	0.175236	9.66743e-06	0.000389274
Zm00001d034757	1465.6	-0.52718	0.164471	0.00134915	0.0177278
Zm00001d034761	2563.45	-0.612501	0.151029	5.00247e-05	0.00144331
Zm00001d034768	1279.6	-0.65568	0.176902	0.00021018	0.00441647
Zm00001d034778	66.4931	1.87482	0.552954	0.000697524	0.0110441
Zm00001d034795	2076.3	-0.564866	0.150099	0.000167693	0.00374378
Zm00001d034840	125.479	1.83247	0.377199	1.18514e-06	7.17164e-05
Zm00001d034848	25.8221	3.09886	0.958042	0.00121825	0.0165078
Zm00001d034865	58.9293	1.55727	0.508473	0.00219401	0.0257512
Zm00001d034868	310.148	1.37494	0.277909	7.51917e-07	4.8297e-05
Zm00001d034871	884.642	-1.12071	0.194341	8.08385e-09	1.05618e-06
Zm00001d034872	74.2987	1.65243	0.450438	0.000243971	0.00496031
Zm00001d034916	376.476	-0.801207	0.225895	0.000389914	0.00708221
Zm00001d034949	711.801	-0.605355	0.206075	0.00330817	0.0346052
Zm00001d034954	1256.08	-0.672573	0.169454	7.2156e-05	0.0019204
Zm00001d034964	801.273	-0.571385	0.183978	0.00189811	0.0230084
Zm00001d034965	337.321	0.947257	0.253588	0.0001874	0.00405007
Zm00001d035000	3405.34	0.994476	0.201129	7.63552e-07	4.89077e-05
Zm00001d035023	520.306	0.661954	0.218874	0.00249155	0.0282232
Zm00001d035029	2555.34	-0.765803	0.148779	2.64314e-07	2.05335e-05
Zm00001d035119	49.987	2.21549	0.600214	0.000223227	0.00462026
Zm00001d035153	612.716	-0.714815	0.221276	0.00123605	0.0166606
Zm00001d035191	100.282	1.89662	0.403785	2.63893e-06	0.000137797
Zm00001d035199	437.166	-0.634418	0.218354	0.00366718	0.0373293
Zm00001d035288	1789.91	-0.664033	0.183046	0.000285967	0.00557921
Zm00001d035303	311.637	-0.672737	0.24216	0.00546824	0.0492334
Zm00001d035356	405.839	0.672983	0.223985	0.00265938	0.0296713
Zm00001d035440	1281.6	-0.590924	0.197397	0.00275718	0.0305108
Zm00001d035462	171.035	-1.58188	0.399307	7.44576e-05	0.0019748
Zm00001d035505	749.651	0.981239	0.233363	2.61338e-05	0.00084443
Zm00001d035559	5398.35	1.09903	0.210188	1.70608e-07	1.4357e-05
Zm00001d035560	8755.36	0.83964	0.203404	3.66028e-05	0.00110894
Zm00001d035589	43.6919	1.99659	0.603778	0.000943581	0.013727
Zm00001d035659	301.04	1.40959	0.343224	4.00996e-05	0.00119597
Zm00001d035683	74.4176	-2.48538	0.570091	1.3029e-05	0.00049115
Zm00001d035710	899.275	-0.592353	0.178189	0.00088644	0.0131612
Zm00001d035720	3664.64	-0.532552	0.142896	0.000193885	0.00416215
Zm00001d035737	103.851	1.56558	0.388668	5.62394e-05	0.00157518
Zm00001d035747	1688.19	-0.711557	0.168227	2.33958e-05	0.000778561
Zm00001d035760	738707	-0.669114	0.14816	6.29733e-06	0.000273221
Zm00001d035764	771.424	1.54533	0.2092	1.5036e-13	6.91504e-11
Zm00001d035776	1273.41	-0.504778	0.178479	0.00468081	0.0443248
Zm00001d035812	1503.25	-0.602563	0.161105	0.000183886	0.00398763
Zm00001d035817	2427.53	-0.591902	0.199764	0.00304648	0.0328275
Zm00001d035963	154.903	1.71421	0.428789	6.3938e-05	0.00174407
Zm00001d035964	2736.04	-0.601768	0.146686	4.0884e-05	0.00121464
Zm00001d036010	72.9755	1.81816	0.497795	0.000259767	0.00517172
Zm00001d036035	74.5606	1.85246	0.473667	9.19572e-05	0.00232114
Zm00001d036036	5108.22	-0.6619	0.149026	8.93296e-06	0.000368675
Zm00001d036073	928.144	-0.687031	0.1812	0.000149696	0.00341833
Zm00001d036122	353.398	1.25117	0.25093	6.16049e-07	4.16648e-05
Zm00001d036125	14178.9	-0.636553	0.172551	0.000225064	0.00465409
Zm00001d036213	5188.11	-0.570318	0.143117	6.74879e-05	0.00181719
Zm00001d036241	673.434	1.41524	0.276349	3.03612e-07	2.31945e-05
Zm00001d036250	183.41	1.25176	0.320746	9.51473e-05	0.00238064
Zm00001d036283	1452.17	-0.621164	0.178226	0.000491656	0.00840566
Zm00001d036351	956.413	1.18062	0.209212	1.66945e-08	1.95013e-06
Zm00001d036440	101.835	1.1045	0.389392	0.00456139	0.0434684
Zm00001d036441	286.325	0.807621	0.2516	0.00132762	0.0175452
Zm00001d036451	1286.27	-0.786779	0.172528	5.10835e-06	0.000234118
Zm00001d036454	1006.48	-0.55783	0.201055	0.00552853	0.0496402
Zm00001d036455	458.3	1.30136	0.303972	1.85887e-05	0.00065541
Zm00001d036507	151.547	0.927344	0.320936	0.00385854	0.03851
Zm00001d036531	39.9868	3.24822	0.793322	4.23179e-05	0.00124917
Zm00001d036533	196.64	1.11426	0.301239	0.000216512	0.00451414
Zm00001d036574	37.7335	2.29118	0.654215	0.000461455	0.00800237
Zm00001d036608	9222.92	-0.744851	0.139511	9.34624e-08	8.88086e-06
Zm00001d036610	103.194	1.49381	0.432293	0.000549168	0.00917937
Zm00001d036613	15.3468	3.7173	1.19878	0.00192934	0.0233011
Zm00001d036637	83.1246	2.30437	0.444069	2.11182e-07	1.68616e-05
Zm00001d036647	212.24	0.919395	0.29699	0.00196341	0.0236112
Zm00001d036710	370.238	-0.777876	0.232749	0.000831408	0.0125448
Zm00001d036715	33.8568	1.96226	0.671828	0.00349161	0.0359077
Zm00001d036741	1798.66	-0.551318	0.164929	0.000829514	0.0125409
Zm00001d036765	2311.81	-0.510512	0.155646	0.0010382	0.0147004
Zm00001d036785	844.721	-0.589571	0.193758	0.00234364	0.0268386
Zm00001d036895	1108.88	-0.811861	0.176814	4.39821e-06	0.000208529
Zm00001d036911	144.336	1.3451	0.354656	0.00014903	0.00340651
Zm00001d036919	223.645	0.803025	0.283979	0.00468752	0.0443578
Zm00001d036929	299.248	2.63866	0.747851	0.000418201	0.00745467
Zm00001d036959	12536.7	-0.740709	0.13169	1.85886e-08	2.10564e-06
Zm00001d036966	379.867	-0.705462	0.234091	0.00258148	0.0289892
Zm00001d036982	509.071	0.824229	0.231655	0.000373694	0.00685255
Zm00001d037025	65.692	1.5704	0.503638	0.00182011	0.0223218
Zm00001d037042	81.6331	-2.94398	0.546796	7.28281e-08	7.15676e-06
Zm00001d037052	4722.56	-0.914696	0.150774	1.30604e-09	2.12996e-07
Zm00001d037094	61.5095	1.86057	0.504946	0.000228979	0.00472231
Zm00001d037096	1466.32	-0.520616	0.171489	0.00239847	0.0273575
Zm00001d037122	1213.14	-0.547158	0.17222	0.00148765	0.0191323
Zm00001d037205	83.0127	-1.45922	0.464734	0.00168996	0.0210153
Zm00001d037211	634.159	1.10938	0.239116	3.49257e-06	0.000172713
Zm00001d037214	1523.86	-0.856222	0.17383	8.40833e-07	5.34403e-05
Zm00001d037234	2542.46	-1.28672	0.147469	2.65226e-18	2.77222e-15
Zm00001d037252	1192.28	-0.886793	0.170709	2.04993e-07	1.65397e-05
Zm00001d037270	96.6501	1.99467	0.41559	1.5897e-06	9.07074e-05
Zm00001d037277	1874.47	-0.580203	0.166667	0.000499166	0.00849617
Zm00001d037279	2089.01	-0.601924	0.162596	0.000213948	0.00448063
Zm00001d037334	503.02	0.76905	0.2294	0.000801035	0.0121985
Zm00001d037337	74.9973	3.13777	0.517454	1.32887e-09	2.15192e-07
Zm00001d037343	1100.5	-0.578679	0.171699	0.000750801	0.0116455
Zm00001d037352	443.339	-0.759243	0.219689	0.000548268	0.00917571
Zm00001d037436	104352	-1.88647	0.127752	2.40225e-49	5.52397e-45
Zm00001d037439	2961.17	-1.01893	0.180602	1.68245e-08	1.95013e-06
Zm00001d037492	1054.31	0.869943	0.200615	1.44848e-05	0.00053378
Zm00001d037493	490.496	1.48471	0.289445	2.90519e-07	2.23428e-05
Zm00001d037512	401.244	-0.648996	0.224369	0.00382143	0.0382892
Zm00001d037519	221.082	1.30036	0.303543	1.83627e-05	0.000649644
Zm00001d037529	607.944	-0.828925	0.195341	2.20091e-05	0.000751195
Zm00001d037532	184.054	1.05996	0.320599	0.000945732	0.0137466
Zm00001d037565	1104.26	-0.697143	0.166128	2.71169e-05	0.000869671
Zm00001d037573	498.063	0.849297	0.207576	4.28583e-05	0.00126349
Zm00001d037586	707.608	-0.783495	0.18797	3.07021e-05	0.000960538
Zm00001d037606	3623.55	-0.553178	0.154525	0.000343782	0.0064284
Zm00001d037631	1707.49	-0.891173	0.176659	4.54467e-07	3.19586e-05
Zm00001d037632	1974.45	-0.771079	0.191117	5.46984e-05	0.00154675
Zm00001d037719	1762.02	-0.686318	0.178376	0.000119288	0.00285733
Zm00001d037720	72.3139	1.71423	0.494057	0.000521052	0.00880999
Zm00001d037725	3348.43	-0.689494	0.162077	2.09869e-05	0.000721367
Zm00001d037744	215.047	-1.16656	0.296282	8.23947e-05	0.00212426
Zm00001d037751	195.09	1.08121	0.301353	0.000333423	0.00627934
Zm00001d037771	1063.64	-0.6008	0.171918	0.000474623	0.0081674
Zm00001d037774	573.254	0.604096	0.199794	0.00249793	0.0282398
Zm00001d037810	123.967	-1.2397	0.363971	0.000659145	0.0105867
Zm00001d037829	2407.23	-0.558251	0.163083	0.000619104	0.0100539
Zm00001d037868	133.853	1.15162	0.356891	0.00125177	0.0168527
Zm00001d037877	4863.95	-0.561148	0.142315	8.04735e-05	0.00208623
Zm00001d037911	159.487	1.19024	0.349271	0.000654949	0.0105359
Zm00001d037932	220.791	1.00241	0.327277	0.00219227	0.0257463
Zm00001d037934	1146.59	0.863289	0.179776	1.5706e-06	9.02899e-05
Zm00001d037939	1481.1	-1.02057	0.183748	2.78951e-08	3.02569e-06
Zm00001d037979	78.5933	1.5981	0.439758	0.000279018	0.00548378
Zm00001d037984	220.839	0.908072	0.279148	0.00114188	0.0157136
Zm00001d038003	894.897	-0.63062	0.175705	0.000331835	0.00626482
Zm00001d038005	482.801	0.611082	0.211239	0.00381768	0.0382883
Zm00001d038021	945.382	-0.603507	0.175091	0.000567217	0.00943395
Zm00001d038039	194.18	-1.2854	0.298296	1.63877e-05	0.000591576
Zm00001d038056	376.072	1.44475	0.271766	1.05983e-07	9.86668e-06
Zm00001d038063	421.024	-0.883835	0.251698	0.000445599	0.00779798
Zm00001d038082	755.087	-0.520768	0.183434	0.00452553	0.0432162
Zm00001d038163	26269.7	-0.669078	0.163622	4.32942e-05	0.00127308
Zm00001d038171	627.123	-0.612882	0.192309	0.00143772	0.0186047
Zm00001d038186	222.618	0.952057	0.284767	0.000827951	0.0125305
Zm00001d038192	94.2879	1.42523	0.420541	0.000701404	0.0110851
Zm00001d038202	720.608	-0.625644	0.195071	0.00134005	0.0176587
Zm00001d038208	854.28	-0.664181	0.184217	0.000311637	0.00597174
Zm00001d038223	155.165	1.21676	0.384394	0.00154865	0.0197292
Zm00001d038224	1612.45	-0.626376	0.174042	0.000319464	0.00609127
Zm00001d038225	835.891	-0.842693	0.191147	1.0404e-05	0.000413196
Zm00001d038227	1628.65	-0.514508	0.163867	0.00169073	0.0210153
Zm00001d038240	215.983	-0.963223	0.299572	0.00130293	0.0172784
Zm00001d038262	1291.88	-0.585304	0.171436	0.000639852	0.0103397
Zm00001d038302	1183.54	0.732218	0.214154	0.000628229	0.0101949
Zm00001d038304	1085.16	-0.589489	0.173901	0.000699477	0.0110622
Zm00001d038326	1394.42	-0.809666	0.185437	1.26398e-05	0.000480418
Zm00001d038340	875.008	-0.522296	0.184362	0.00461145	0.0438183
Zm00001d038342	482.465	-0.872225	0.238535	0.000255596	0.00512417
Zm00001d038378	991.122	-0.63597	0.180034	0.000411652	0.00737222
Zm00001d038380	3260.73	-0.727337	0.170757	2.04901e-05	0.000707462
Zm00001d038452	804.728	-0.716153	0.186507	0.000123129	0.00293313
Zm00001d038513	276.805	1.17658	0.27852	2.39575e-05	0.000791526
Zm00001d038526	118.507	1.17974	0.361469	0.00109958	0.0153183
Zm00001d038536	992.287	-0.841008	0.180283	3.0874e-06	0.000156376
Zm00001d038547	357.931	-0.744698	0.23127	0.00128173	0.0171257
Zm00001d038558	188.105	0.979548	0.312181	0.00170245	0.0211039
Zm00001d038562	937.191	0.603563	0.177811	0.000687769	0.0109221
Zm00001d038574	74.7518	1.50772	0.470218	0.00134392	0.0176996
Zm00001d038583	808.796	1.18855	0.208441	1.1833e-08	1.4788e-06
Zm00001d038608	100.615	1.49731	0.404728	0.000215996	0.00451119
Zm00001d038646	868.28	-0.570231	0.179875	0.0015236	0.0194965
Zm00001d038667	175.293	1.66206	0.334286	6.62733e-07	4.4301e-05
Zm00001d038671	958.729	-0.684701	0.194937	0.000444048	0.00778554
Zm00001d038676	735.115	0.557508	0.184376	0.00249656	0.0282398
Zm00001d038682	517.463	0.896221	0.229978	9.73944e-05	0.00242379
Zm00001d038684	455.086	-0.813354	0.211105	0.000116751	0.00280531
Zm00001d038698	754.7	-0.524901	0.186876	0.00497225	0.0462528
Zm00001d038718	358.815	1.15327	0.266363	1.49334e-05	0.000546806
Zm00001d038720	652.153	0.609229	0.2047	0.00291845	0.031818
Zm00001d038730	419.284	-0.803393	0.245476	0.00106491	0.0149505
Zm00001d038741	458.809	0.89836	0.284548	0.00159321	0.0200964
Zm00001d038747	440.266	-0.901545	0.235449	0.000128638	0.00304609
Zm00001d038780	332.426	0.777192	0.256505	0.00244609	0.027818
Zm00001d038804	2002.22	-0.50196	0.150212	0.000832741	0.0125566
Zm00001d038809	229.567	1.14351	0.285312	6.12586e-05	0.00167861
Zm00001d038815	401.065	-0.790343	0.225324	0.000452204	0.00788956
Zm00001d038860	741.098	-0.898323	0.206821	1.4024e-05	0.000520971
Zm00001d038861	28.4658	2.28049	0.792184	0.00399269	0.0393704
Zm00001d038870	1060.32	1.0519	0.230861	5.20328e-06	0.00023693
Zm00001d038875	19.2397	3.04462	1.01674	0.00274903	0.0304353
Zm00001d038894	37.9465	1.96478	0.64249	0.00222764	0.0259513
Zm00001d038913	75.3098	3.46734	0.551567	3.25029e-10	7.05098e-08
Zm00001d039004	307.985	-1.26767	0.287947	1.07035e-05	0.000422898
Zm00001d039006	1050.31	-0.787357	0.169056	3.20258e-06	0.000161145
Zm00001d039007	328.207	-0.751681	0.237502	0.0015511	0.0197495
Zm00001d039011	837.642	-0.936598	0.207895	6.63257e-06	0.000285611
Zm00001d039015	1200.03	-0.845175	0.17424	1.23074e-06	7.35088e-05
Zm00001d039037	612.116	1.31072	0.203442	1.17361e-10	2.97721e-08
Zm00001d039051	506.124	-0.685503	0.206706	0.000912094	0.0133828
Zm00001d039062	385.666	1.03949	0.273208	0.000141937	0.00329682
Zm00001d039066	1991.53	-0.630898	0.181994	0.000527108	0.00889278
Zm00001d039072	711.7	-0.540329	0.187582	0.00397053	0.0392179
Zm00001d039087	128.677	-1.18732	0.352542	0.000757459	0.0116976
Zm00001d039088	179.13	-1.20584	0.307579	8.83957e-05	0.00225378
Zm00001d039147	1200.41	-0.634573	0.165848	0.00013012	0.00307199
Zm00001d039156	568.203	-0.729425	0.239106	0.00228359	0.0263698
Zm00001d039158	853.066	-0.617328	0.192779	0.00136356	0.0178662
Zm00001d039166	1718.8	-0.92404	0.157525	4.4651e-09	6.33797e-07
Zm00001d039255	425.27	0.915986	0.236116	0.000104719	0.00257817
Zm00001d039267	910.623	-1.0024	0.189388	1.20427e-07	1.08596e-05
Zm00001d039283	2272.99	-1.81036	0.191149	2.77235e-21	4.55358e-18
Zm00001d039302	72.3387	1.99529	0.557576	0.000345568	0.00643713
Zm00001d039306	132.703	1.38243	0.38399	0.000318011	0.00607363
Zm00001d039350	3276.64	-0.531473	0.147723	0.000320953	0.00610953
Zm00001d039385	236.612	0.860958	0.302718	0.00445376	0.0427796
Zm00001d039400	256.804	-0.836985	0.295278	0.00458879	0.0436571
Zm00001d039401	343.452	-0.731922	0.25315	0.00383704	0.0383621
Zm00001d039432	190.095	1.4561	0.358083	4.77501e-05	0.00138813
Zm00001d039453	49.2768	1.77116	0.555812	0.00143951	0.0186069
Zm00001d039474	502.761	0.977216	0.241691	5.27169e-05	0.00150587
Zm00001d039510	55.8213	2.30279	0.583688	7.97232e-05	0.00207185
Zm00001d039512	6900.15	-1.04744	0.149446	2.4033e-12	9.05964e-10
Zm00001d039547	1926.52	-0.83844	0.16731	5.40621e-07	3.72203e-05
Zm00001d039581	42.0955	1.62662	0.585291	0.00544996	0.0491073
Zm00001d039582	250.429	-0.960252	0.264462	0.000282361	0.00554001
Zm00001d039590	187.006	1.1734	0.297227	7.8865e-05	0.0020608
Zm00001d039594	802.139	-0.573799	0.185708	0.00200293	0.0239632
Zm00001d039596	209.792	1.23328	0.294989	2.9054e-05	0.000919891
Zm00001d039606	297.552	-0.768001	0.270993	0.00459658	0.0437132
Zm00001d039617	83.1767	1.63391	0.448314	0.000267846	0.00530959
Zm00001d039647	239.536	0.81279	0.282426	0.00400349	0.0394431
Zm00001d039683	262.884	0.746406	0.258015	0.0038173	0.0382883
Zm00001d039691	96.2035	1.41734	0.416133	0.000659281	0.0105867
Zm00001d039771	912.499	-0.656616	0.175281	0.000179617	0.00391953
Zm00001d039826	308.134	-0.869195	0.273579	0.00148741	0.0191323
Zm00001d039854	506.797	-1.00496	0.214714	2.86255e-06	0.000146276
Zm00001d039859	1959.66	0.889987	0.17401	3.14458e-07	2.39436e-05
Zm00001d039860	2567.58	-0.580097	0.153489	0.000157194	0.00356256
Zm00001d039910	326.77	1.1934	0.30567	9.45307e-05	0.00237307
Zm00001d039913	397.787	-1.08856	0.230511	2.33121e-06	0.000126729
Zm00001d039914	1232.01	0.866143	0.221282	9.07052e-05	0.0022971
Zm00001d039916	1813.84	-0.688911	0.153292	6.98591e-06	0.000298589
Zm00001d039918	258.546	-0.974858	0.266211	0.000250276	0.00503949
Zm00001d039935	41.8687	1.90245	0.644018	0.00313655	0.0334532
Zm00001d039989	3042.23	-0.612488	0.148578	3.75048e-05	0.00113179
Zm00001d039994	350.567	0.806496	0.270993	0.00291959	0.031818
Zm00001d040028	6239.23	0.73248	0.165829	1.00038e-05	0.000400065
Zm00001d040046	141.67	1.6055	0.377784	2.13992e-05	0.000734441
Zm00001d040057	260.15	-0.913496	0.280033	0.00110588	0.0153747
Zm00001d040066	153.516	-0.914018	0.32652	0.00512188	0.0473193
Zm00001d040090	151.628	1.12244	0.358374	0.00173605	0.0214742
Zm00001d040110	225.854	1.42825	0.339878	2.64287e-05	0.000852353
Zm00001d040123	1952.72	-0.533673	0.157906	0.000725676	0.0113904
Zm00001d040130	123.584	1.15541	0.377294	0.00219605	0.0257512
Zm00001d040155	812.619	-0.692048	0.188925	0.000249204	0.00502231
Zm00001d040189	9824.81	-1.27789	0.150193	1.76392e-17	1.69006e-14
Zm00001d040202	543.615	0.810017	0.206148	8.519e-05	0.00217903
Zm00001d040266	349.509	1.01057	0.300589	0.00077392	0.0119039
Zm00001d040279	1747.18	-0.572209	0.163481	0.000464981	0.00803927
Zm00001d040290	548.696	0.784886	0.205917	0.000138039	0.00321927
Zm00001d040303	201.697	-0.80003	0.285553	0.00508361	0.0470413
Zm00001d040305	101.946	1.65489	0.482534	0.000604531	0.00988774
Zm00001d040314	1526.12	-1.01195	0.18506	4.54536e-08	4.70814e-06
Zm00001d040318	1438.55	-0.871056	0.190814	4.99643e-06	0.000231125
Zm00001d040341	348.595	0.833533	0.2333	0.000353198	0.00654945
Zm00001d040357	776.285	-0.556452	0.195057	0.00433409	0.0419279
Zm00001d040358	88.0629	-1.52425	0.461734	0.000962919	0.0139523
Zm00001d040508	265.986	1.173	0.280972	2.98264e-05	0.000936963
Zm00001d040509	571.228	0.740412	0.243866	0.00239631	0.0273465
Zm00001d040555	740.436	-0.584504	0.184581	0.00154205	0.0196669
Zm00001d040593	3370.06	-0.658641	0.180375	0.000260705	0.00518592
Zm00001d040613	2358.74	0.855164	0.220475	0.000105004	0.00258241
Zm00001d040628	102.823	-1.49536	0.4382	0.00064371	0.0103947
Zm00001d040650	204.105	1.27065	0.341007	0.000194411	0.00416215
Zm00001d040651	304.675	-1.04128	0.268701	0.000106518	0.00260055
Zm00001d040670	666.512	0.684238	0.21622	0.00155327	0.0197552
Zm00001d040695	179.142	1.65912	0.318334	1.86941e-07	1.53525e-05
Zm00001d040697	1947.77	0.765142	0.158566	1.39724e-06	8.15472e-05
Zm00001d040733	31.3785	2.6761	0.720615	0.000204307	0.00431806
Zm00001d040763	125.632	-1.74156	0.369516	2.43991e-06	0.000130783
Zm00001d040775	1272.38	-0.815039	0.19594	3.18745e-05	0.000989141
Zm00001d040787	101.975	-1.33009	0.460714	0.00388911	0.0386366
Zm00001d040789	1114.01	-0.526731	0.166801	0.00158942	0.0200788
Zm00001d040834	802.587	-0.514949	0.185253	0.00544083	0.0490875
Zm00001d040898	416.244	-0.835687	0.2274	0.000237884	0.00487101
Zm00001d040960	361.125	0.787953	0.244395	0.00126369	0.0169537
Zm00001d041072	1650.63	0.524571	0.163616	0.0013454	0.0177089
Zm00001d041092	672.832	-0.574586	0.193825	0.00303217	0.0327192
Zm00001d041105	5425.3	-0.521756	0.142724	0.000256484	0.00513243
Zm00001d041201	107.516	1.56077	0.406282	0.00012224	0.00291891
Zm00001d041215	324.47	1.07023	0.296389	0.000305134	0.00588638
Zm00001d041217	114.795	1.50768	0.407355	0.000214617	0.00448647
Zm00001d041307	1273.85	-0.675817	0.169448	6.65367e-05	0.0017979
Zm00001d041334	78.4931	1.20306	0.432141	0.00537024	0.0486368
Zm00001d041353	160.645	1.37946	0.39557	0.000487979	0.00835523
Zm00001d041378	740.213	-0.554029	0.187489	0.00312677	0.0334108
Zm00001d041407	819.892	-0.58618	0.182262	0.00129929	0.0172445
Zm00001d041456	919.964	-0.594138	0.174986	0.000685398	0.0108995
Zm00001d041538	68.9595	4.50507	0.622362	4.53092e-13	1.92941e-10
Zm00001d041575	520.479	-0.745161	0.211946	0.000438412	0.00770118
Zm00001d041578	765.209	0.980628	0.232643	2.49597e-05	0.000812957
Zm00001d041672	162.698	0.942267	0.321454	0.00337583	0.0351254
Zm00001d041685	3094.08	-0.599552	0.1641	0.000258621	0.00515784
Zm00001d041703	529.807	-0.732574	0.205779	0.000370852	0.00680586
Zm00001d041757	128.247	1.3853	0.383891	0.000307876	0.00591446
Zm00001d041822	472.754	-1.12133	0.213893	1.58435e-07	1.35435e-05
Zm00001d041850	110.047	1.05735	0.373558	0.00464789	0.0440831
Zm00001d041889	729.744	1.42616	0.230825	6.46932e-10	1.27147e-07
Zm00001d041956	171.66	1.07094	0.316019	0.000701896	0.0110852
Zm00001d041962	896.315	0.973087	0.233256	3.02262e-05	0.00094823
Zm00001d041998	476.503	-0.837397	0.248343	0.000746407	0.0116206
Zm00001d042005	538.21	-0.703081	0.205816	0.000635322	0.0102737
Zm00001d042011	17428.1	-0.722654	0.132609	5.05063e-08	5.11626e-06
Zm00001d042025	12332	-0.503801	0.169394	0.00293815	0.0319107
Zm00001d042027	790.706	0.634456	0.1944	0.00109982	0.0153183
Zm00001d042050	174.173	1.00284	0.342534	0.00341459	0.0354009
Zm00001d042056	498.015	-1.45462	0.312568	3.25931e-06	0.000163642
Zm00001d042064	186.396	0.939387	0.294718	0.00143551	0.0185864
Zm00001d042114	1812.84	-0.798621	0.18245	1.20205e-05	0.000462225
Zm00001d042115	847.484	-0.90239	0.222328	4.93186e-05	0.00142472
Zm00001d042131	287.398	1.67033	0.304309	4.04397e-08	4.26564e-06
Zm00001d042140	39.0942	7.19596	1.5707	4.61937e-06	0.000217592
Zm00001d042180	667.104	-0.714888	0.227377	0.00166617	0.0208
Zm00001d042215	626.388	-0.897374	0.198599	6.22747e-06	0.000270701
Zm00001d042216	529.912	0.596994	0.214273	0.0053341	0.0484185
Zm00001d042241	98.6039	1.251	0.396036	0.00158416	0.0200373
Zm00001d042256	273.166	-0.980301	0.29777	0.000994295	0.0142542
Zm00001d042303	1190.11	-0.526466	0.180222	0.00348671	0.0358734
Zm00001d042331	899.598	-0.847576	0.175764	1.41956e-06	8.26397e-05
Zm00001d042396	506.649	1.04906	0.244262	1.74832e-05	0.00062621
Zm00001d042402	73.7827	-1.84147	0.462956	6.96047e-05	0.00186439
Zm00001d042416	3466.76	-0.537455	0.142987	0.000170743	0.00377523
Zm00001d042468	786.136	0.598409	0.200092	0.0027837	0.0307451
Zm00001d042478	612.768	-0.758044	0.207152	0.000252852	0.00507802
Zm00001d042505	1018.54	-0.563416	0.173743	0.00118359	0.0161502
Zm00001d042512	2464.03	-0.744934	0.174235	1.90739e-05	0.00066556
Zm00001d042525	11862.4	-0.55647	0.141247	8.15854e-05	0.00211268
Zm00001d042551	172.359	0.959409	0.325972	0.0032481	0.03423
Zm00001d042572	439.478	-1.0348	0.236933	1.25696e-05	0.000478539
Zm00001d042637	40.4716	-2.04091	0.650416	0.00170187	0.0211039
Zm00001d042658	57.8065	1.64861	0.521939	0.00158513	0.0200385
Zm00001d042664	374.005	1.02312	0.242108	2.38008e-05	0.000788617
Zm00001d042669	997.689	-0.584645	0.175856	0.000885531	0.0131612
Zm00001d042680	160.715	-1.34448	0.36667	0.00024568	0.00497745
Zm00001d042724	1343.56	-0.560455	0.165425	0.000704124	0.0111052
Zm00001d042730	1776.62	-0.577606	0.178145	0.00118551	0.0161502
Zm00001d042755	176.879	-0.996761	0.312006	0.00139984	0.0181963
Zm00001d042780	46.9458	2.66393	0.612154	1.35069e-05	0.000505848
Zm00001d042830	122.665	-1.50371	0.365839	3.95129e-05	0.00118462
Zm00001d042833	743.562	-0.6621	0.187515	0.000414118	0.00738762
Zm00001d042862	73.2501	1.82248	0.591107	0.00204813	0.0243898
Zm00001d042868	98.523	1.23925	0.427735	0.00376474	0.0379029
Zm00001d042886	93.0714	1.25898	0.426434	0.00315368	0.0335581
Zm00001d042902	24.384	2.50103	0.820619	0.00230575	0.0264839
Zm00001d042909	171.616	0.890595	0.304334	0.00342945	0.0354965
Zm00001d042930	678.576	0.689043	0.187415	0.000236398	0.00484921
Zm00001d042973	2357.55	-1.2798	0.14928	1.00665e-17	1.00643e-14
Zm00001d043009	147.892	-0.963134	0.345515	0.00531109	0.0483677
Zm00001d043014	727.827	-1.7511	0.188234	1.36818e-20	2.09742e-17
Zm00001d043029	1399.57	-1.13777	0.170823	2.72845e-11	8.04368e-09
Zm00001d043038	540.7	-0.609831	0.200468	0.0023498	0.026869
Zm00001d043049	369.01	0.929153	0.329404	0.00479175	0.0450107
Zm00001d043059	3426.99	-0.988191	0.149757	4.14944e-11	1.13591e-08
Zm00001d043097	773.591	-0.514635	0.182415	0.00478409	0.0449603
Zm00001d043110	112.615	1.36082	0.371068	0.000245114	0.00497475
Zm00001d043131	886.174	-0.86283	0.18152	2.00074e-06	0.000111128
Zm00001d043158	2554.71	0.830441	0.145967	1.27616e-08	1.57e-06
Zm00001d043164	77.3476	1.92922	0.5314	0.000282938	0.00554188
Zm00001d043178	244.63	1.34505	0.295091	5.16232e-06	0.000235999
Zm00001d043183	799.853	-0.612529	0.184034	0.000873641	0.0130505
Zm00001d043187	286.145	-0.877758	0.256783	0.000630163	0.010219
Zm00001d043188	78.1286	1.91829	0.44863	1.90382e-05	0.00066556
Zm00001d043193	2875.12	-0.526439	0.166715	0.00159007	0.0200788
Zm00001d043220	79.8393	-1.3151	0.443366	0.0030154	0.0326148
Zm00001d043224	311.335	0.76667	0.242877	0.00159612	0.0201222
Zm00001d043276	271.918	-1.1356	0.292542	0.000103678	0.00255802
Zm00001d043299	212.062	-1.9413	0.3288	3.54343e-09	5.32557e-07
Zm00001d043335	1770.27	-0.649413	0.161538	5.81534e-05	0.00161113
Zm00001d043348	346.558	1.04532	0.29168	0.000338656	0.00636225
Zm00001d043382	20149	-0.692475	0.135602	3.27867e-07	2.45621e-05
Zm00001d043390	2313.39	-0.617557	0.163935	0.000165165	0.00370173
Zm00001d043484	374.077	0.891536	0.311637	0.00422555	0.0411199
Zm00001d043497	817.831	0.530994	0.179263	0.0030556	0.0328987
Zm00001d043504	742.427	0.616817	0.189464	0.0011316	0.0156527
Zm00001d043540	340.173	1.23599	0.276675	7.92184e-06	0.000331205
Zm00001d043558	206.462	0.888695	0.287817	0.00201706	0.0240697
Zm00001d043566	639.529	-0.690051	0.199497	0.000542267	0.0090885
Zm00001d043610	656.199	-0.789177	0.194723	5.06063e-05	0.0014551
Zm00001d043656	37.013	1.86021	0.64137	0.00372714	0.0377392
Zm00001d043674	756.97	-0.694912	0.195628	0.000382	0.00696598
Zm00001d043702	335.438	1.06771	0.268549	7.01303e-05	0.00187082
Zm00001d043709	480.135	0.780241	0.253722	0.00210375	0.0249359
Zm00001d043716	367.307	-0.885494	0.244029	0.000284909	0.00557098
Zm00001d043757	3588.15	-0.586446	0.149071	8.35446e-05	0.0021441
Zm00001d043766	62.2152	1.73762	0.59423	0.00345394	0.0356322
Zm00001d043775	1458.35	-0.71131	0.182093	9.37237e-05	0.00235796
Zm00001d043845	2625.48	-0.513391	0.176526	0.00363404	0.0370575
Zm00001d043850	1227.66	-0.581589	0.203187	0.00420533	0.0410273
Zm00001d043851	248.324	1.06463	0.265508	6.07755e-05	0.0016677
Zm00001d043861	3243.34	-0.71263	0.147321	1.31639e-06	7.76166e-05
Zm00001d043890	982.662	-0.958463	0.185242	2.29011e-07	1.8159e-05
Zm00001d043912	250.184	1.16958	0.266659	1.15431e-05	0.000449125
Zm00001d043974	147.05	-1.01411	0.338957	0.00277291	0.0306553
Zm00001d043986	3309.34	-0.786857	0.146613	8.00951e-08	7.67411e-06
Zm00001d043989	951.094	-0.941301	0.172831	5.14139e-08	5.18536e-06
Zm00001d043990	34.3586	2.67096	0.728543	0.000246221	0.00498269
Zm00001d044019	632.299	-0.864666	0.202454	1.9466e-05	0.000678213
Zm00001d044022	636.131	0.739034	0.206527	0.000345721	0.00643713
Zm00001d044037	187.677	1.3949	0.307007	5.53196e-06	0.000247005
Zm00001d044056	1090.6	-1.08642	0.169854	1.59298e-10	3.89688e-08
Zm00001d044078	308.396	0.882745	0.300301	0.00328711	0.0344831
Zm00001d044080	262.961	1.48461	0.295865	5.22459e-07	3.60779e-05
Zm00001d044120	123.463	1.91742	0.409623	2.85565e-06	0.000146276
Zm00001d044129	26748.7	-1.6856	0.150746	5.01006e-29	2.30413e-25
Zm00001d044139	773.021	-0.599158	0.186028	0.00127834	0.0170933
Zm00001d044156	698.604	-1.71513	0.196104	2.20991e-18	2.41985e-15
Zm00001d044175	2042.43	-0.53922	0.174191	0.0019644	0.0236112
Zm00001d044184	1283.67	-0.652057	0.194653	0.000808573	0.0122808
Zm00001d044201	746.717	-0.572467	0.203637	0.00493549	0.0460225
Zm00001d044243	917.762	-0.558401	0.186316	0.00272593	0.0302523
Zm00001d044303	1178.8	-0.644241	0.173123	0.000198208	0.004228
Zm00001d044339	107.896	1.17001	0.416918	0.00501084	0.0465741
Zm00001d044379	1075.35	-0.579761	0.168985	0.000601719	0.00987075
Zm00001d044433	1203.44	-0.770235	0.176927	1.34035e-05	0.000503616
Zm00001d044442	291.28	1.32501	0.250376	1.20939e-07	1.08632e-05
Zm00001d044479	994.092	-0.733752	0.173895	2.44844e-05	0.000805463
Zm00001d044480	590.105	-0.846537	0.200707	2.4673e-05	0.000809051
Zm00001d044488	803.529	-0.627074	0.185572	0.000727133	0.0114055
Zm00001d044494	931.741	0.553041	0.174068	0.00148722	0.0191323
Zm00001d044528	1410.19	-0.700902	0.162631	1.63431e-05	0.000590896
Zm00001d044533	505.414	0.619655	0.2153	0.00400081	0.0394336
Zm00001d044553	551.146	-0.702917	0.228885	0.00213304	0.0251664
Zm00001d044581	313.667	1.53474	0.261545	4.41134e-09	6.33797e-07
Zm00001d044602	573.407	-0.622496	0.196273	0.00151608	0.0194219
Zm00001d044607	398.401	2.58307	0.25028	5.68001e-25	1.18738e-21
Zm00001d044608	317.378	1.53122	0.260703	4.26894e-09	6.19861e-07
Zm00001d044614	2398.57	-0.551871	0.145805	0.000153705	0.003496
Zm00001d044644	26.7812	2.10502	0.752176	0.00513289	0.0474019
Zm00001d044672	493.508	1.78909	0.227777	4.01136e-15	2.30603e-12
Zm00001d044677	66.4523	1.65369	0.509123	0.00116174	0.0159203
Zm00001d044686	477.116	1.07136	0.296208	0.000298151	0.00578564
Zm00001d044690	26.77	3.38525	0.866982	9.43674e-05	0.00237156
Zm00001d044699	1449.43	-0.625079	0.165793	0.000163088	0.00365874
Zm00001d044747	11714.2	-0.71591	0.147403	1.19295e-06	7.18114e-05
Zm00001d044754	4014	-0.565192	0.137751	4.07806e-05	0.00121313
Zm00001d044769	294.845	0.866756	0.293968	0.00319355	0.033779
Zm00001d044874	589.665	-1.19833	0.204597	4.71288e-09	6.60809e-07
Zm00001d044908	94.6575	1.15264	0.414331	0.00540366	0.048854
Zm00001d044940	1964.75	-0.591838	0.165368	0.000345017	0.00643443
Zm00001d044971	977.12	-0.515508	0.173704	0.00299994	0.0324934
Zm00001d044979	2143.48	-0.509331	0.153451	0.000902851	0.0132787
Zm00001d045017	102.368	1.7845	0.396211	6.67113e-06	0.000286199
Zm00001d045027	879.589	0.567179	0.190773	0.00294847	0.0319812
[truncated: 411 more rows]
