# Supplementary material for: PNGSeqR: An R Package for Rapid Candidate Gene Selection through Pooled Next-Generation Sequencing
Source: Plants (Basel). 2022 Jul 11;11(14):1821. doi: 10.3390/plants11141821 (PMC9315718; doi:10.3390/plants11141821)
Supplement: Supplementary file 1 [file plants-11-01821-s001.zip › Table S3.xlsx]

## Sheet: Sheet1
Table S3. The gene IDs and GO terms of maize genes in B73 reference genome version 4
Genea	GO Termsb
Zm00001d012464	GO:0044282
Zm00001d012464	GO:0005777
Zm00001d012464	GO:0055114
Zm00001d012464	GO:0010264
Zm00001d012464	GO:0071482
Zm00001d012464	GO:0003959
Zm00001d012464	GO:0003954
Zm00001d012464	GO:0046496
Zm00001d012464	GO:0006091
Zm00001d012464	GO:0031304
Zm00001d012464	GO:0050660
Zm00001d012464	GO:0005759
Zm00001d012464	GO:0005975
Zm00001d010658	GO:0016020
Zm00001d010658	GO:0009410
Zm00001d010658	GO:0009863
Zm00001d010658	GO:0043565
Zm00001d010658	GO:0006355
Zm00001d010658	GO:0046983
Zm00001d010658	GO:0005737
Zm00001d010658	GO:0005634
Zm00001d010658	GO:0009627
Zm00001d010658	GO:0003700
Zm00001d010659	GO:0080092
Zm00001d010659	GO:0061025
Zm00001d010659	GO:0044710
Zm00001d010659	GO:0009751
Zm00001d010659	GO:0019903
Zm00001d010659	GO:0005829
Zm00001d010659	GO:0010359
Zm00001d010659	GO:0005524
Zm00001d010659	GO:0005773
Zm00001d010659	GO:0009651
Zm00001d010659	GO:0046777
Zm00001d010659	GO:0005634
Zm00001d010659	GO:0005509
Zm00001d010659	GO:0043687
Zm00001d010659	GO:0009738
Zm00001d010659	GO:0004674
Zm00001d010659	GO:0046686
Zm00001d010659	GO:0010119
Zm00001d010659	GO:0005886
Zm00001d010659	GO:0009506
Zm00001d010659	GO:2000026
Zm00001d010656	GO:0051301
Zm00001d010656	GO:0005737
Zm00001d010656	GO:0006139
Zm00001d010656	GO:0003779
Zm00001d010656	GO:0010332
Zm00001d010656	GO:0022402
Zm00001d010656	GO:0005634
Zm00001d010656	GO:0019901
Zm00001d010656	GO:0001558
Zm00001d010656	GO:0000079
Zm00001d010657	GO:0003978
Zm00001d010657	GO:0050662
Zm00001d010657	GO:0016021
Zm00001d010657	GO:0006012
Zm00001d010657	GO:0009058
Zm00001d010657	GO:0044237
Zm00001d010654	GO:0006863
Zm00001d010654	GO:0044237
Zm00001d010654	GO:0003676
Zm00001d010654	GO:0010584
Zm00001d010654	GO:0016021
Zm00001d010654	GO:0008643
Zm00001d010654	GO:0065007
Zm00001d010654	GO:0016779
Zm00001d010654	GO:0050896
Zm00001d010654	GO:0005802
Zm00001d010654	GO:0005768
Zm00001d010655	GO:0016021
Zm00001d010655	GO:0009755
Zm00001d010655	GO:0005275
Zm00001d010655	GO:0055085
Zm00001d010655	GO:0015171
Zm00001d010652	GO:0016021
Zm00001d010652	GO:0006457
Zm00001d010652	GO:0009414
Zm00001d010652	GO:0003676
Zm00001d010652	GO:0004842
Zm00001d010652	GO:0042542
Zm00001d010652	GO:0009651
Zm00001d010652	GO:0005634
Zm00001d010652	GO:0009408
Zm00001d010652	GO:0009644
Zm00001d010652	GO:0010029
Zm00001d010652	GO:0009738
Zm00001d010652	GO:0010228
Zm00001d010652	GO:0044238
Zm00001d010653	GO:0044238
Zm00001d010653	GO:0032501
Zm00001d010653	GO:0044249
Zm00001d010653	GO:0016021
Zm00001d010653	GO:0043170
Zm00001d010653	GO:0005488
Zm00001d010650	GO:2000082
Zm00001d010650	GO:0005773
Zm00001d010650	GO:0009612
Zm00001d010650	GO:0019722
Zm00001d010650	GO:0009846
Zm00001d010650	GO:0010099
Zm00001d010650	GO:0005634
Zm00001d010650	GO:0005509
Zm00001d010650	GO:0006468
Zm00001d010650	GO:0005886
Zm00001d010650	GO:0034599
Zm00001d010651	GO:0034702
Zm00001d010651	GO:0044237
Zm00001d010651	GO:0030955
Zm00001d010651	GO:0006813
Zm00001d010651	GO:0050794
Zm00001d010651	GO:0005887
Zm00001d010651	GO:0055085
Zm00001d010651	GO:0050896
Zm00001d010651	GO:0005249
Zm00001d048139	GO:0019953
Zm00001d048139	GO:0044237
Zm00001d048139	GO:0032440
Zm00001d048139	GO:0020037
Zm00001d048139	GO:0012505
Zm00001d048139	GO:0055114
Zm00001d048139	GO:0044238
Zm00001d048139	GO:0007399
Zm00001d048139	GO:0005576
Zm00001d048139	GO:0016021
Zm00001d020552	GO:0005794
Zm00001d020552	GO:0009693
Zm00001d020552	GO:0050829
Zm00001d020552	GO:0016021
Zm00001d020552	GO:0009611
Zm00001d020552	GO:0009612
Zm00001d020552	GO:0032501
Zm00001d020552	GO:0006811
Zm00001d020552	GO:0050794
Zm00001d020552	GO:0050832
Zm00001d020552	GO:0005886
Zm00001d020552	GO:0009506
Zm00001d020552	GO:0007568
Zm00001d020552	GO:0010200
Zm00001d020552	GO:0048856
Zm00001d020552	GO:0005576
Zm00001d026529	GO:0016021
Zm00001d026529	GO:0009987
Zm00001d026529	GO:0006810
Zm00001d027409	GO:0044710
Zm00001d027409	GO:1901371
Zm00001d027409	GO:0003677
Zm00001d027409	GO:0050896
Zm00001d027409	GO:0006355
Zm00001d027409	GO:0005634
Zm00001d027409	GO:0009908
Zm00001d027409	GO:0003700
Zm00001d027408	GO:0032501
Zm00001d027408	GO:0009987
Zm00001d027408	GO:0051179
Zm00001d027408	GO:0042221
Zm00001d027408	GO:0050789
Zm00001d027405	GO:0030001
Zm00001d027405	GO:0005737
Zm00001d027405	GO:0046916
Zm00001d027405	GO:0046914
Zm00001d027405	GO:0008152
Zm00001d027405	GO:0050896
Zm00001d027405	GO:0005576
Zm00001d027404	GO:0000288
Zm00001d027404	GO:0016021
Zm00001d027407	GO:0016021
Zm00001d027407	GO:1902600
Zm00001d027407	GO:0046872
Zm00001d027407	GO:0005524
Zm00001d027407	GO:0008553
Zm00001d027407	GO:0050896
Zm00001d027407	GO:0006754
Zm00001d027407	GO:0005886
Zm00001d027406	GO:0016021
Zm00001d027406	GO:0003676
Zm00001d027406	GO:0005654
Zm00001d027406	GO:0050896
Zm00001d027406	GO:0005737
Zm00001d027406	GO:0006357
Zm00001d027406	GO:0006468
Zm00001d027401	GO:0016157
Zm00001d027401	GO:0015914
Zm00001d027401	GO:0016021
Zm00001d027401	GO:0005794
Zm00001d027401	GO:0005886
Zm00001d027401	GO:0051301
Zm00001d027401	GO:0003723
Zm00001d027401	GO:0006396
Zm00001d027400	GO:0044703
Zm00001d027400	GO:0003676
Zm00001d027400	GO:0005737
Zm00001d027400	GO:0046784
Zm00001d027400	GO:0008380
Zm00001d027400	GO:0019048
Zm00001d027400	GO:0000446
Zm00001d027400	GO:0000445
Zm00001d027400	GO:0006397
Zm00001d027403	GO:0003677
Zm00001d027403	GO:0005634
Zm00001d027403	GO:0032501
Zm00001d027403	GO:0009987
Zm00001d027403	GO:0005886
Zm00001d027403	GO:0050789
Zm00001d027403	GO:0016757
Zm00001d027402	GO:0031975
Zm00001d027402	GO:0007165
Zm00001d027402	GO:0016021
Zm00001d027402	GO:0006278
Zm00001d027402	GO:0003677
Zm00001d027402	GO:0006810
Zm00001d027402	GO:0006355
Zm00001d027402	GO:0005634
Zm00001d027402	GO:0003964
Zm00001d027402	GO:0048731
Zm00001d027402	GO:0042597
Zm00001d027402	GO:0036094
Zm00001d027402	GO:0042221
Zm00001d027402	GO:0009507
Zm00001d027402	GO:0048522
Zm00001d010385	GO:0080090
Zm00001d010385	GO:0023052
Zm00001d010385	GO:0003735
Zm00001d010385	GO:0048519
Zm00001d010385	GO:0050794
Zm00001d010385	GO:0005886
Zm00001d010385	GO:0016874
Zm00001d010385	GO:0005840
Zm00001d010385	GO:0048731
Zm00001d010385	GO:0006412
Zm00001d010386	GO:0003735
Zm00001d010386	GO:0003824
Zm00001d010386	GO:0005840
Zm00001d010386	GO:0003723
Zm00001d010386	GO:0006412
Zm00001d010387	GO:0016829
Zm00001d010387	GO:0006520
Zm00001d010387	GO:0016043
Zm00001d010387	GO:0003735
Zm00001d010387	GO:0005840
Zm00001d010387	GO:0007399
Zm00001d010387	GO:0006412
Zm00001d010380	GO:0008270
Zm00001d010380	GO:0006661
Zm00001d010380	GO:0015996
Zm00001d010380	GO:0009867
Zm00001d010380	GO:0010150
Zm00001d010380	GO:0006355
Zm00001d010380	GO:0005634
Zm00001d010380	GO:0006979
Zm00001d010380	GO:0005886
Zm00001d010381	GO:0034641
Zm00001d010381	GO:0023052
Zm00001d010381	GO:0044260
Zm00001d010381	GO:0016020
Zm00001d010381	GO:0050794
Zm00001d010381	GO:0048731
Zm00001d010381	GO:0007154
Zm00001d010381	GO:0005975
Zm00001d010381	GO:0004553
Zm00001d010382	GO:0016310
Zm00001d010382	GO:0050789
Zm00001d010382	GO:0016021
Zm00001d010382	GO:0006974
Zm00001d010382	GO:0008440
Zm00001d010382	GO:0006259
Zm00001d010383	GO:0019222
Zm00001d010383	GO:0007165
Zm00001d010383	GO:0016021
Zm00001d010383	GO:0043687
Zm00001d010383	GO:0005975
Zm00001d010383	GO:0004553
Zm00001d010383	GO:0048731
Zm00001d010383	GO:0048522
Zm00001d010388	GO:0044238
Zm00001d010388	GO:0032501
Zm00001d010388	GO:0044237
Zm00001d010388	GO:0051179
Zm00001d010388	GO:0050789
Zm00001d020750	GO:0044710
Zm00001d020750	GO:0004185
Zm00001d020750	GO:0006508
Zm00001d020750	GO:0042221
Zm00001d020750	GO:0044237
Zm00001d020751	GO:0044710
Zm00001d020751	GO:0004185
Zm00001d020751	GO:0006508
Zm00001d020751	GO:0042221
Zm00001d020751	GO:0044237
Zm00001d020752	GO:0005488
Zm00001d020752	GO:0044710
Zm00001d020752	GO:0004185
Zm00001d020752	GO:0006508
Zm00001d020752	GO:0042221
Zm00001d020752	GO:0044237
Zm00001d020754	GO:0044710
Zm00001d020754	GO:0004185
Zm00001d020754	GO:0006508
Zm00001d020754	GO:0050896
Zm00001d020754	GO:0044237
Zm00001d020755	GO:0048856
Zm00001d020755	GO:0051649
Zm00001d020755	GO:0016043
Zm00001d020755	GO:0005524
Zm00001d020755	GO:0006810
Zm00001d020755	GO:0008017
Zm00001d020755	GO:0007018
Zm00001d020755	GO:0003777
Zm00001d020755	GO:0016021
Zm00001d020757	GO:0044237
Zm00001d020757	GO:0005789
Zm00001d020757	GO:0009658
Zm00001d020757	GO:0008270
Zm00001d020757	GO:0003676
Zm00001d020757	GO:0010274
Zm00001d020757	GO:0005524
Zm00001d020757	GO:0032541
Zm00001d020757	GO:0009507
Zm00001d023318	GO:0008152
Zm00001d023318	GO:0009987
Zm00001d023318	GO:0006952
Zm00001d023318	GO:0043531
Zm00001d023318	GO:0009607
Zm00001d023315	GO:0006855
Zm00001d023315	GO:0008270
Zm00001d023315	GO:0003676
Zm00001d023315	GO:0016021
Zm00001d023315	GO:0006468
Zm00001d023315	GO:0043176
Zm00001d023314	GO:0060089
Zm00001d023314	GO:0016567
Zm00001d023314	GO:0019344
Zm00001d023314	GO:0007165
Zm00001d023314	GO:0048569
Zm00001d023314	GO:0009651
Zm00001d023314	GO:0009944
Zm00001d023314	GO:0048646
Zm00001d023314	GO:0009954
Zm00001d023314	GO:0010014
Zm00001d023314	GO:0005737
Zm00001d023314	GO:0005634
Zm00001d023314	GO:0007030
Zm00001d023314	GO:0010075
Zm00001d023314	GO:0004871
Zm00001d023314	GO:0009638
Zm00001d023314	GO:0006816
Zm00001d023314	GO:0048439
Zm00001d023314	GO:0005886
Zm00001d023314	GO:0010227
Zm00001d023314	GO:2000026
Zm00001d023314	GO:0009855
Zm00001d023317	GO:0043531
Zm00001d023317	GO:0006952
Zm00001d023317	GO:0008152
Zm00001d023317	GO:0005886
Zm00001d023317	GO:0051704
Zm00001d023317	GO:0009607
Zm00001d023317	GO:0007165
Zm00001d023316	GO:0007165
Zm00001d023316	GO:0005634
Zm00001d023316	GO:0004672
Zm00001d023316	GO:0005524
Zm00001d023316	GO:0006468
Zm00001d023316	GO:0032501
Zm00001d023316	GO:0048856
Zm00001d023311	GO:0043531
Zm00001d023311	GO:0006952
Zm00001d023311	GO:0008152
Zm00001d023311	GO:0005886
Zm00001d023311	GO:0051707
Zm00001d023311	GO:0007165
Zm00001d023313	GO:0060089
Zm00001d023313	GO:0007165
Zm00001d023313	GO:0048513
Zm00001d023313	GO:0046872
Zm00001d023313	GO:0016567
Zm00001d023313	GO:0009944
Zm00001d023313	GO:0009860
Zm00001d023313	GO:0048646
Zm00001d023313	GO:0010014
Zm00001d023313	GO:0009416
Zm00001d023313	GO:0010075
Zm00001d023313	GO:0004871
Zm00001d023313	GO:0005886
Zm00001d023313	GO:0035295
Zm00001d023313	GO:2000026
Zm00001d023313	GO:0009855
Zm00001d023312	GO:0016310
Zm00001d023312	GO:0007165
Zm00001d023312	GO:0008270
Zm00001d023312	GO:0070887
Zm00001d023312	GO:0016021
Zm00001d023312	GO:0016301
Zm00001d023312	GO:0006950
Zm00001d023312	GO:0016874
Zm00001d023312	GO:0009725
Zm00001d015699	GO:0031012
Zm00001d015699	GO:0005834
Zm00001d015699	GO:0016021
Zm00001d015699	GO:0016043
Zm00001d015699	GO:0065007
Zm00001d015699	GO:0004672
Zm00001d015699	GO:0005524
Zm00001d015699	GO:0006468
Zm00001d002122	GO:0003676
Zm00001d002122	GO:0000166
Zm00001d002122	GO:0016021
Zm00001d002122	GO:0050789
Zm00001d002122	GO:0006396
Zm00001d024839	GO:0009407
Zm00001d024839	GO:0004364
Zm00001d024839	GO:0006749
Zm00001d024839	GO:0042221
Zm00001d024839	GO:0044238
Zm00001d024839	GO:0005829
Zm00001d024839	GO:0005488
Zm00001d024838	GO:0031323
Zm00001d024838	GO:0034641
Zm00001d024838	GO:0034645
Zm00001d024838	GO:0004842
Zm00001d024838	GO:0048513
Zm00001d024838	GO:0009889
Zm00001d024838	GO:0009888
Zm00001d024838	GO:0016874
Zm00001d024838	GO:0016567
Zm00001d021809	GO:0044237
Zm00001d021809	GO:0005509
Zm00001d021809	GO:0032502
Zm00001d021809	GO:0032501
Zm00001d021809	GO:0009941
Zm00001d021809	GO:0044238
Zm00001d021809	GO:0009535
Zm00001d021809	GO:0055085
Zm00001d021803	GO:0034645
Zm00001d021803	GO:0005542
Zm00001d021803	GO:0005739
Zm00001d021803	GO:0016740
Zm00001d021803	GO:0016310
Zm00001d021803	GO:0050794
Zm00001d021803	GO:0009116
Zm00001d021803	GO:0055114
Zm00001d021803	GO:0005576
Zm00001d021803	GO:0006259
Zm00001d021803	GO:0016021
Zm00001d024830	GO:0004252
Zm00001d024830	GO:0048513
Zm00001d024830	GO:0032440
Zm00001d024830	GO:0006606
Zm00001d024830	GO:0030163
Zm00001d024830	GO:0055114
Zm00001d024830	GO:0009941
Zm00001d024830	GO:0009658
Zm00001d024830	GO:0005730
Zm00001d024830	GO:0005739
Zm00001d024830	GO:0006508
Zm00001d024830	GO:0044743
Zm00001d024830	GO:0010206
Zm00001d024830	GO:0010075
Zm00001d024830	GO:0019288
Zm00001d024830	GO:0009535
Zm00001d024830	GO:0009533
Zm00001d024830	GO:0006406
Zm00001d024830	GO:2000026
Zm00001d024833	GO:0030136
Zm00001d024833	GO:0009825
Zm00001d024833	GO:0004427
Zm00001d024833	GO:0016021
Zm00001d024833	GO:0000287
Zm00001d024833	GO:0005886
Zm00001d024833	GO:0051179
Zm00001d024833	GO:0000911
Zm00001d024832	GO:0005789
Zm00001d024832	GO:0055075
Zm00001d024832	GO:0016021
Zm00001d024832	GO:0005774
Zm00001d024832	GO:0048513
Zm00001d024832	GO:0010351
Zm00001d024832	GO:0015992
Zm00001d024832	GO:0006891
Zm00001d024832	GO:0016558
Zm00001d024832	GO:0000139
Zm00001d024832	GO:0048366
Zm00001d024832	GO:0015386
Zm00001d024832	GO:0015385
Zm00001d024832	GO:0000325
Zm00001d024832	GO:0006869
Zm00001d024832	GO:0051453
Zm00001d024832	GO:0009651
Zm00001d024832	GO:0090333
Zm00001d024832	GO:0098719
Zm00001d024832	GO:0010107
Zm00001d024832	GO:0005886
Zm00001d024832	GO:0009507
Zm00001d024835	GO:0045454
Zm00001d024835	GO:0004791
Zm00001d024835	GO:0022900
Zm00001d024835	GO:0006662
Zm00001d024835	GO:0047134
Zm00001d024835	GO:0009570
Zm00001d024835	GO:0043085
Zm00001d024835	GO:0019252
Zm00001d024835	GO:0016671
Zm00001d024835	GO:0006109
Zm00001d024835	GO:0000023
Zm00001d024835	GO:0043086
Zm00001d024835	GO:0006740
Zm00001d024835	GO:0006007
Zm00001d024835	GO:0008047
Zm00001d024835	GO:0016137
Zm00001d024835	GO:0019288
Zm00001d024835	GO:0006098
Zm00001d024835	GO:0009534
Zm00001d024835	GO:0019760
Zm00001d024835	GO:0034599
Zm00001d024835	GO:0009055
Zm00001d024835	GO:0015035
Zm00001d021806	GO:0032012
Zm00001d021806	GO:0005086
Zm00001d021806	GO:0005488
Zm00001d021806	GO:0043547
Zm00001d021806	GO:0016021
Zm00001d021806	GO:0016043
Zm00001d021806	GO:0016192
Zm00001d021806	GO:0046907
Zm00001d021805	GO:0016021
Zm00001d021805	GO:0005086
Zm00001d021805	GO:0016043
Zm00001d021805	GO:0004712
Zm00001d021805	GO:0030658
Zm00001d021805	GO:0005886
Zm00001d021805	GO:0046907
Zm00001d021805	GO:0006898
Zm00001d021805	GO:0015031
Zm00001d021805	GO:0005769
Zm00001d024836	GO:0030246
Zm00001d024836	GO:0004672
Zm00001d024836	GO:0016021
Zm00001d024836	GO:0005524
Zm00001d024836	GO:0006468
Zm00001d024836	GO:0050794
Zm00001d024836	GO:0048856
Zm00001d045022	GO:0044267
Zm00001d045022	GO:0016021
Zm00001d045022	GO:0016043
Zm00001d017501	GO:0033328
Zm00001d017501	GO:0042802
Zm00001d017501	GO:0004222
Zm00001d017501	GO:0005778
Zm00001d017501	GO:0007031
Zm00001d017501	GO:0005829
Zm00001d017501	GO:0005992
Zm00001d017501	GO:0015031
Zm00001d017501	GO:0005634
Zm00001d017507	GO:0048518
Zm00001d017507	GO:0003677
Zm00001d017507	GO:0065003
Zm00001d017507	GO:0006359
Zm00001d017507	GO:0000126
Zm00001d017507	GO:0001026
Zm00001d017507	GO:0051172
Zm00001d017507	GO:0048856
Zm00001d017507	GO:0006259
Zm00001d017507	GO:0048523
Zm00001d015693	GO:0044283
Zm00001d015693	GO:0006520
Zm00001d015693	GO:0051225
Zm00001d015693	GO:0051011
Zm00001d015693	GO:0009309
Zm00001d015693	GO:0005819
Zm00001d015693	GO:0042180
Zm00001d015693	GO:0009524
Zm00001d015693	GO:0070652
Zm00001d017506	GO:0006810
Zm00001d017506	GO:0003844
Zm00001d017506	GO:0043169
Zm00001d017506	GO:0016021
Zm00001d017506	GO:0065008
Zm00001d017506	GO:0009536
Zm00001d017506	GO:0032502
Zm00001d017506	GO:0003008
Zm00001d017506	GO:0050794
Zm00001d017506	GO:0007154
Zm00001d017506	GO:0005978
Zm00001d017506	GO:0004553
Zm00001d017506	GO:0050896
Zm00001d015692	GO:0005819
Zm00001d015692	GO:0005634
Zm00001d015692	GO:0051225
Zm00001d015692	GO:0051011
Zm00001d015692	GO:0055046
Zm00001d015692	GO:0009561
Zm00001d015692	GO:0009524
Zm00001d015692	GO:0046907
Zm00001d015692	GO:0070652
Zm00001d015692	GO:0050896
Zm00001d045025	GO:0051290
Zm00001d045025	GO:1901671
Zm00001d045025	GO:0005829
Zm00001d045025	GO:0019344
Zm00001d045025	GO:0048481
Zm00001d045025	GO:0009941
Zm00001d045025	GO:0009570
Zm00001d045025	GO:0005524
Zm00001d045025	GO:0005516
Zm00001d045025	GO:0006986
Zm00001d045025	GO:0009788
Zm00001d045025	GO:0051087
Zm00001d045025	GO:0051082
Zm00001d045025	GO:0009651
Zm00001d045025	GO:0005507
Zm00001d045025	GO:0051085
Zm00001d045025	GO:0005759
Zm00001d045025	GO:0009409
Zm00001d045025	GO:0006007
Zm00001d045025	GO:0048046
Zm00001d045025	GO:0019288
Zm00001d045025	GO:0006096
Zm00001d045025	GO:0009535
Zm00001d045025	GO:0046686
Zm00001d045025	GO:0006094
Zm00001d045025	GO:0044267
Zm00001d045025	GO:0009658
Zm00001d045025	GO:0048569
Zm00001d017504	GO:0032501
Zm00001d017504	GO:0050794
Zm00001d017504	GO:0003950
Zm00001d017504	GO:0005622
Zm00001d045029	GO:0006784
Zm00001d045029	GO:0055114
Zm00001d045029	GO:0044702
Zm00001d045029	GO:0051537
Zm00001d045029	GO:0005739
Zm00001d045029	GO:0006744
Zm00001d045029	GO:0016653
Zm00001d045029	GO:0016226
Zm00001d045029	GO:0035295
Zm00001d045029	GO:0009055
Zm00001d045029	GO:0044238
Zm00001d045029	GO:0048868
Zm00001d017508	GO:0071495
Zm00001d017508	GO:0005783
Zm00001d017508	GO:0006869
Zm00001d017508	GO:0008233
Zm00001d017508	GO:0016021
Zm00001d017508	GO:0009506
Zm00001d017508	GO:0048518
Zm00001d017508	GO:0006508
Zm00001d017508	GO:0043687
Zm00001d017508	GO:0006468
Zm00001d017508	GO:0032501
Zm00001d017508	GO:0050794
Zm00001d017508	GO:0009535
Zm00001d017508	GO:0007010
Zm00001d017508	GO:0048856
Zm00001d017508	GO:0023052
Zm00001d007328	GO:0006826
Zm00001d007328	GO:0046130
Zm00001d007328	GO:0006260
Zm00001d007328	GO:0009207
Zm00001d007328	GO:0046034
Zm00001d007328	GO:0055114
Zm00001d007328	GO:0072512
Zm00001d007328	GO:0016887
Zm00001d007328	GO:0009941
Zm00001d007328	GO:0005524
Zm00001d007328	GO:0009154
Zm00001d007328	GO:0050896
Zm00001d007328	GO:0005215
Zm00001d007328	GO:0005886
Zm00001d048268	GO:0003714
Zm00001d048268	GO:0051704
Zm00001d048268	GO:0031347
Zm00001d048268	GO:0006351
Zm00001d048268	GO:0009611
Zm00001d048268	GO:0005634
Zm00001d048268	GO:1903507
Zm00001d048268	GO:2000022
Zm00001d048266	GO:0030117
Zm00001d048266	GO:0044281
Zm00001d048266	GO:0040029
Zm00001d048266	GO:0016570
Zm00001d048266	GO:0006281
Zm00001d048266	GO:0003678
Zm00001d048266	GO:0000723
Zm00001d048266	GO:0006355
Zm00001d048266	GO:0032508
Zm00001d048266	GO:0045934
Zm00001d048267	GO:0003678
Zm00001d048267	GO:0005839
Zm00001d048267	GO:0006261
Zm00001d048267	GO:0000723
Zm00001d048267	GO:0006281
Zm00001d048267	GO:0032508
Zm00001d048267	GO:0050794
Zm00001d048267	GO:0030117
Zm00001d007329	GO:0043565
Zm00001d007329	GO:0042221
Zm00001d007329	GO:0003700
Zm00001d007329	GO:0006950
Zm00001d007329	GO:0006355
Zm00001d048262	GO:0006633
Zm00001d048262	GO:0005783
Zm00001d048262	GO:0016021
Zm00001d048262	GO:0016747
Zm00001d048262	GO:0009628
Zm00001d048263	GO:0003714
Zm00001d048263	GO:0051704
Zm00001d048263	GO:0031347
Zm00001d048263	GO:0006351
Zm00001d048263	GO:0009611
Zm00001d048263	GO:0005634
Zm00001d048263	GO:1903507
Zm00001d048263	GO:2000022
Zm00001d048260	GO:0004499
Zm00001d048260	GO:0050660
Zm00001d048260	GO:0016021
Zm00001d048260	GO:0009987
Zm00001d048260	GO:0050661
Zm00001d048260	GO:0006950
Zm00001d048260	GO:0055114
Zm00001d048260	GO:0051704
Zm00001d034509	GO:0022626
Zm00001d034509	GO:0015934
Zm00001d034509	GO:0019843
Zm00001d034509	GO:0016043
Zm00001d034509	GO:0044710
Zm00001d034509	GO:0005739
Zm00001d034509	GO:0003735
Zm00001d034509	GO:0006354
Zm00001d034509	GO:0006412
Zm00001d050459	GO:0044249
Zm00001d050459	GO:0006807
Zm00001d050459	GO:0005488
Zm00001d050459	GO:0000003
Zm00001d050459	GO:0044260
Zm00001d050459	GO:0016021
Zm00001d050459	GO:0042254
Zm00001d050459	GO:0007275
Zm00001d050459	GO:0010467
Zm00001d050459	GO:0044238
Zm00001d050459	GO:0051179
Zm00001d050459	GO:0040010
Zm00001d003666	GO:0005789
Zm00001d003666	GO:0009644
Zm00001d003666	GO:0031090
Zm00001d003666	GO:0005773
Zm00001d003666	GO:0016021
Zm00001d003666	GO:0015693
Zm00001d003666	GO:0009987
Zm00001d003666	GO:1903830
Zm00001d003666	GO:0034220
Zm00001d003666	GO:0005886
Zm00001d003666	GO:0015095
Zm00001d003666	GO:0046907
Zm00001d003666	GO:0042542
Zm00001d050455	GO:0010252
Zm00001d050455	GO:0044283
Zm00001d050455	GO:0009809
Zm00001d050455	GO:0016021
Zm00001d050455	GO:0009963
Zm00001d050455	GO:2000762
Zm00001d050455	GO:0032502
Zm00001d050455	GO:0031328
Zm00001d050455	GO:0047172
Zm00001d050455	GO:0032787
Zm00001d050455	GO:1900378
Zm00001d050455	GO:0047205
Zm00001d050456	GO:0016021
Zm00001d050456	GO:0006857
Zm00001d050456	GO:0009987
Zm00001d050456	GO:0005886
Zm00001d050456	GO:0022892
Zm00001d050456	GO:0050896
Zm00001d050456	GO:0022857
Zm00001d050457	GO:0006855
Zm00001d050457	GO:0044283
Zm00001d050457	GO:0016021
Zm00001d050457	GO:0015238
Zm00001d050457	GO:0015297
Zm00001d050457	GO:0008324
Zm00001d050457	GO:0044238
Zm00001d050457	GO:0044237
Zm00001d050451	GO:0016021
Zm00001d050451	GO:0044237
Zm00001d050451	GO:0071806
Zm00001d050451	GO:0006886
Zm00001d050451	GO:0015450
Zm00001d050451	GO:0005741
Zm00001d050452	GO:0000003
Zm00001d050452	GO:0003677
Zm00001d050452	GO:0043392
Zm00001d050452	GO:0006355
Zm00001d050452	GO:0005737
Zm00001d050452	GO:0005634
Zm00001d050452	GO:0009640
Zm00001d050452	GO:0009733
Zm00001d050452	GO:0009737
Zm00001d050452	GO:0009735
Zm00001d050452	GO:0009739
Zm00001d050452	GO:0051641
Zm00001d050452	GO:0009741
Zm00001d053112	GO:0032501
Zm00001d053112	GO:0009987
Zm00001d053112	GO:0006952
Zm00001d053112	GO:0005576
Zm00001d053112	GO:0008152
Zm00001d007323	GO:0006952
Zm00001d007323	GO:0043531
Zm00001d007323	GO:0005886
Zm00001d007323	GO:0051704
Zm00001d007323	GO:0009607
Zm00001d007323	GO:0007165
Zm00001d024245	GO:0031977
Zm00001d024245	GO:0005773
Zm00001d024245	GO:0010319
Zm00001d024245	GO:0005777
Zm00001d024245	GO:0005829
Zm00001d024245	GO:0019344
Zm00001d024245	GO:0009941
Zm00001d024245	GO:0009570
Zm00001d024245	GO:0019243
Zm00001d024245	GO:0016151
Zm00001d024245	GO:0009651
Zm00001d024245	GO:0005739
Zm00001d024245	GO:0009409
Zm00001d024245	GO:0006979
Zm00001d024245	GO:0019863
Zm00001d024245	GO:0006096
Zm00001d024245	GO:0006094
Zm00001d024245	GO:0004462
Zm00001d024245	GO:0046686
Zm00001d024245	GO:0005886
Zm00001d007320	GO:0008483
Zm00001d007320	GO:0005737
Zm00001d007320	GO:0016884
Zm00001d007320	GO:0016043
Zm00001d007320	GO:0000166
Zm00001d007320	GO:0000375
Zm00001d007320	GO:0043039
Zm00001d007320	GO:0016651
Zm00001d007320	GO:0006412
Zm00001d007320	GO:0016021
Zm00001d007320	GO:0006397
Zm00001d024242	GO:0046130
Zm00001d024242	GO:0009207
Zm00001d024242	GO:0005794
Zm00001d024242	GO:0046034
Zm00001d024242	GO:0005829
Zm00001d024242	GO:0000221
Zm00001d024242	GO:0005488
Zm00001d024242	GO:0042626
Zm00001d024242	GO:0015992
Zm00001d024242	GO:0009154
Zm00001d024242	GO:0006623
Zm00001d024242	GO:0033572
Zm00001d024242	GO:0000325
Zm00001d024242	GO:0051453
Zm00001d024242	GO:0009651
Zm00001d024242	GO:0008286
Zm00001d024242	GO:0006879
Zm00001d024242	GO:0055085
Zm00001d024242	GO:0007033
Zm00001d024242	GO:0007030
Zm00001d024242	GO:0006816
Zm00001d024242	GO:0090382
Zm00001d024242	GO:0005886
Zm00001d026602	GO:0035335
Zm00001d026602	GO:0016043
Zm00001d026602	GO:0005230
Zm00001d026602	GO:0007399
Zm00001d026602	GO:0004725
Zm00001d026602	GO:0005488
Zm00001d053117	GO:0022607
Zm00001d053117	GO:0015833
Zm00001d053117	GO:0005488
Zm00001d053117	GO:0000003
Zm00001d053117	GO:0048869
Zm00001d053117	GO:0016021
Zm00001d053117	GO:0016740
Zm00001d053117	GO:0055085
Zm00001d053117	GO:0044238
Zm00001d053117	GO:0060255
Zm00001d053117	GO:0050794
Zm00001d053117	GO:0009059
Zm00001d053117	GO:0007015
Zm00001d053117	GO:0050896
Zm00001d053117	GO:0048731
Zm00001d018234	GO:0016021
Zm00001d018234	GO:0050789
Zm00001d018234	GO:0044267
Zm00001d018234	GO:0043412
Zm00001d018234	GO:1902600
Zm00001d018234	GO:0005507
Zm00001d018234	GO:0006122
Zm00001d018234	GO:0008121
Zm00001d018234	GO:0016722
Zm00001d018235	GO:0010605
Zm00001d018235	GO:0010604
Zm00001d018235	GO:0048513
Zm00001d018235	GO:0005488
Zm00001d018235	GO:0043549
Zm00001d018235	GO:0050896
Zm00001d018235	GO:0005634
Zm00001d018235	GO:0031327
Zm00001d018235	GO:0031325
Zm00001d018235	GO:0006357
Zm00001d018235	GO:0051172
Zm00001d018235	GO:0048699
Zm00001d018237	GO:0016021
Zm00001d018237	GO:0040029
Zm00001d018237	GO:0006733
Zm00001d018237	GO:0005488
Zm00001d018237	GO:0045489
Zm00001d018237	GO:0006950
Zm00001d018237	GO:0006355
Zm00001d018237	GO:0010558
Zm00001d018237	GO:0031327
Zm00001d018237	GO:0016413
Zm00001d018237	GO:0055086
Zm00001d018237	GO:0009834
Zm00001d018237	GO:0010629
Zm00001d018237	GO:0030244
Zm00001d018237	GO:0009827
Zm00001d018237	GO:0045934
Zm00001d018237	GO:0010383
Zm00001d018237	GO:0005802
Zm00001d018237	GO:0005768
Zm00001d018230	GO:0009693
Zm00001d018230	GO:0008660
Zm00001d018230	GO:0042744
Zm00001d018230	GO:0005829
Zm00001d018230	GO:0019148
Zm00001d018230	GO:0050897
Zm00001d018230	GO:0009651
Zm00001d018230	GO:0032880
Zm00001d018230	GO:0005739
Zm00001d018230	GO:0019761
Zm00001d018230	GO:0070301
Zm00001d018230	GO:0006007
Zm00001d018230	GO:0030170
Zm00001d018230	GO:0016138
Zm00001d018230	GO:0019288
Zm00001d018230	GO:0006096
Zm00001d018230	GO:0006094
Zm00001d018230	GO:0019447
Zm00001d018230	GO:0046686
Zm00001d018230	GO:0009507
Zm00001d018230	GO:0042180
Zm00001d018231	GO:0019222
Zm00001d018231	GO:0003678
Zm00001d018231	GO:0008234
Zm00001d018231	GO:0000723
Zm00001d018231	GO:0005839
Zm00001d018231	GO:0006281
Zm00001d018231	GO:0006261
Zm00001d018231	GO:0032508
Zm00001d018231	GO:0050794
Zm00001d018231	GO:0008094
Zm00001d018231	GO:0005488
Zm00001d018233	GO:0009595
Zm00001d018233	GO:0009697
Zm00001d018233	GO:0034765
Zm00001d018233	GO:0000165
Zm00001d018233	GO:0043900
Zm00001d018233	GO:0005221
Zm00001d018233	GO:0050832
Zm00001d018233	GO:0010363
Zm00001d018233	GO:0031348
Zm00001d018233	GO:0042391
Zm00001d018233	GO:0006612
Zm00001d018233	GO:0002831
Zm00001d018233	GO:0009862
Zm00001d018233	GO:0009867
Zm00001d018233	GO:0005516
Zm00001d018233	GO:0010310
Zm00001d018233	GO:0005242
Zm00001d018233	GO:0071805
Zm00001d018233	GO:0030553
Zm00001d018233	GO:0030552
Zm00001d018233	GO:0010200
Zm00001d018233	GO:0006816
Zm00001d018233	GO:0042742
Zm00001d018233	GO:0009535
Zm00001d018233	GO:0005887
Zm00001d018233	GO:0009743
Zm00001d018233	GO:0009624
Zm00001d020160	GO:0044238
Zm00001d020160	GO:0044237
Zm00001d020160	GO:0006950
Zm00001d020160	GO:0046872
Zm00001d018238	GO:0044237
Zm00001d018238	GO:0045454
Zm00001d018238	GO:0009570
Zm00001d018238	GO:0006662
Zm00001d018238	GO:0047134
Zm00001d018238	GO:0034599
Zm00001d018238	GO:0055114
Zm00001d018238	GO:0009055
Zm00001d018238	GO:0044238
Zm00001d018238	GO:0043170
Zm00001d018238	GO:0016671
Zm00001d018238	GO:0004791
Zm00001d018238	GO:0015035
Zm00001d013080	GO:0016310
Zm00001d013080	GO:0005199
Zm00001d013080	GO:0016021
Zm00001d013080	GO:0071555
Zm00001d013080	GO:0005576
Zm00001d013080	GO:0009505
Zm00001d013080	GO:0009506
Zm00001d013080	GO:0005840
Zm00001d013080	GO:0016301
Zm00001d013080	GO:0007275
Zm00001d013080	GO:0050896
Zm00001d017279	GO:0009963
Zm00001d017279	GO:0045548
Zm00001d017279	GO:0080167
Zm00001d017279	GO:0006575
Zm00001d017279	GO:1900378
Zm00001d017279	GO:0006598
Zm00001d017279	GO:0042398
Zm00001d017279	GO:0046244
Zm00001d017279	GO:0008652
Zm00001d017279	GO:0009819
Zm00001d017279	GO:0009611
Zm00001d017279	GO:0005737
Zm00001d017279	GO:0009555
Zm00001d017279	GO:0009805
Zm00001d017279	GO:0009800
Zm00001d017279	GO:0006979
Zm00001d017279	GO:0031328
Zm00001d017279	GO:0046274
Zm00001d017279	GO:2000762
Zm00001d017279	GO:0010224
Zm00001d017279	GO:0006559
Zm00001d013081	GO:0009062
Zm00001d013081	GO:0008270
Zm00001d013081	GO:0031425
Zm00001d013081	GO:0016556
Zm00001d013081	GO:0005739
Zm00001d013081	GO:0004519
Zm00001d013081	GO:0009507
Zm00001d013081	GO:0090305
Zm00001d013081	GO:0003723
Zm00001d004730	GO:0016021
Zm00001d004730	GO:0044237
Zm00001d004730	GO:0005488
Zm00001d004731	GO:0004030
Zm00001d004731	GO:0005783
Zm00001d004731	GO:0044281
Zm00001d004731	GO:0009651
Zm00001d004731	GO:0009737
Zm00001d004731	GO:0005773
Zm00001d004731	GO:0016021
Zm00001d004731	GO:0044238
Zm00001d004731	GO:0009269
Zm00001d004731	GO:0055114
Zm00001d004731	GO:0009507
Zm00001d004731	GO:0006081
Zm00001d049226	GO:0008843
Zm00001d049226	GO:0009651
Zm00001d049226	GO:0005975
Zm00001d049226	GO:0044710
Zm00001d049226	GO:0009737
Zm00001d049226	GO:0009753
Zm00001d049226	GO:0005618
Zm00001d049226	GO:0005576
Zm00001d049226	GO:0006032
Zm00001d049226	GO:0032501
Zm00001d049226	GO:0009987
Zm00001d049226	GO:0035885
Zm00001d049226	GO:0048856
Zm00001d049226	GO:0008061
Zm00001d042233	GO:0022627
Zm00001d042233	GO:0044710
Zm00001d042233	GO:0016043
Zm00001d042233	GO:0003735
Zm00001d042233	GO:0006412
Zm00001d042233	GO:0005488
Zm00001d004733	GO:0005261
Zm00001d004733	GO:0016021
Zm00001d004733	GO:0015276
Zm00001d004733	GO:0065007
Zm00001d004733	GO:0004672
Zm00001d004733	GO:0005524
Zm00001d004733	GO:0006468
Zm00001d004733	GO:0046873
Zm00001d004733	GO:0050896
Zm00001d020559	GO:0005730
Zm00001d020559	GO:0001522
Zm00001d020559	GO:0000166
Zm00001d020559	GO:0009982
Zm00001d020559	GO:0016071
Zm00001d020559	GO:0003723
Zm00001d020559	GO:0006396
Zm00001d042231	GO:0008233
Zm00001d042231	GO:0042221
Zm00001d042231	GO:0044238
Zm00001d042231	GO:0050832
Zm00001d042231	GO:0031640
Zm00001d042231	GO:0044237
Zm00001d042231	GO:0005576
Zm00001d017268	GO:0009695
Zm00001d017268	GO:0042538
Zm00001d017268	GO:0016021
Zm00001d017268	GO:0044212
Zm00001d017268	GO:0002679
Zm00001d017268	GO:0009873
Zm00001d017268	GO:0009414
Zm00001d017268	GO:0009867
Zm00001d017268	GO:0000981
Zm00001d017268	GO:0043565
Zm00001d017268	GO:0009751
Zm00001d017268	GO:0006357
Zm00001d017268	GO:0030154
Zm00001d017268	GO:0009611
Zm00001d017268	GO:0001135
Zm00001d017268	GO:0005634
Zm00001d017268	GO:0009409
Zm00001d017268	GO:0010200
Zm00001d017268	GO:0003682
Zm00001d017268	GO:0009733
Zm00001d017268	GO:0009739
Zm00001d017268	GO:0009738
Zm00001d017268	GO:0046686
Zm00001d017268	GO:0052542
Zm00001d017268	GO:0009743
Zm00001d047359	GO:0080167
Zm00001d047359	GO:0009908
Zm00001d047359	GO:0009062
Zm00001d047359	GO:0003677
Zm00001d047359	GO:0048646
Zm00001d047359	GO:0010358
Zm00001d047359	GO:0005634
Zm00001d047359	GO:0045892
Zm00001d047359	GO:0010073
Zm00001d047358	GO:0009664
Zm00001d047358	GO:0009505
Zm00001d047358	GO:0098869
Zm00001d047358	GO:0005576
Zm00001d047358	GO:0009506
Zm00001d047358	GO:0046872
Zm00001d047358	GO:0020037
Zm00001d047358	GO:0070301
Zm00001d047358	GO:0055114
Zm00001d047358	GO:0009628
Zm00001d047358	GO:0004601
Zm00001d047358	GO:0042744
Zm00001d047353	GO:0009828
Zm00001d047353	GO:0016020
Zm00001d047353	GO:0048767
Zm00001d047353	GO:0006949
Zm00001d047353	GO:0009831
Zm00001d047353	GO:0048446
Zm00001d047353	GO:0009826
Zm00001d047353	GO:0009739
Zm00001d047353	GO:0010119
Zm00001d047353	GO:0010114
Zm00001d047353	GO:0009505
Zm00001d047353	GO:0005576
Zm00001d047352	GO:0005488
Zm00001d047352	GO:0006810
Zm00001d047352	GO:0004842
Zm00001d047352	GO:0050896
Zm00001d047352	GO:0016567
Zm00001d047351	GO:0031348
Zm00001d047351	GO:0009697
Zm00001d047351	GO:0016021
Zm00001d047351	GO:0048513
Zm00001d047351	GO:0048518
Zm00001d047351	GO:0048767
Zm00001d047351	GO:0015706
Zm00001d047351	GO:0044260
Zm00001d047351	GO:0009863
Zm00001d047351	GO:0048646
Zm00001d047351	GO:0043412
Zm00001d047351	GO:0010167
Zm00001d047351	GO:0009664
Zm00001d047351	GO:0006970
Zm00001d047351	GO:0031323
Zm00001d047351	GO:0090304
Zm00001d047351	GO:0046686
Zm00001d047351	GO:0045087
Zm00001d047351	GO:0005886
Zm00001d047351	GO:0009913
Zm00001d047351	GO:0006796
Zm00001d047350	GO:0009970
Zm00001d047350	GO:0016021
Zm00001d047350	GO:0019725
Zm00001d047350	GO:0016787
Zm00001d047350	GO:0051179
Zm00001d047350	GO:0044237
Zm00001d047356	GO:0000165
Zm00001d047356	GO:0048513
Zm00001d047356	GO:0046983
Zm00001d047356	GO:0005634
Zm00001d047356	GO:0045944
Zm00001d047356	GO:0009908
Zm00001d047356	GO:0000977
Zm00001d047356	GO:0003700
Zm00001d047355	GO:0000165
Zm00001d047355	GO:0048513
Zm00001d047355	GO:0046983
Zm00001d047355	GO:0009791
Zm00001d047355	GO:0005634
Zm00001d047355	GO:0048608
Zm00001d047355	GO:0045944
Zm00001d047355	GO:0000977
Zm00001d047355	GO:0003700
Zm00001d047354	GO:0009737
Zm00001d047354	GO:0000795
Zm00001d047354	GO:0044710
Zm00001d047354	GO:0071535
Zm00001d047354	GO:0000087
Zm00001d047354	GO:0033145
Zm00001d047354	GO:0044703
Zm00001d047354	GO:0010469
Zm00001d047354	GO:0009793
Zm00001d047354	GO:0016881
Zm00001d047354	GO:0043425
Zm00001d047354	GO:0016605
Zm00001d047354	GO:0016567
Zm00001d047354	GO:0005524
Zm00001d047354	GO:0007059
Zm00001d047354	GO:0043398
Zm00001d047354	GO:0000122
Zm00001d047354	GO:0008022
Zm00001d047354	GO:0005737
Zm00001d047354	GO:0043161
Zm00001d047354	GO:0030425
Zm00001d047354	GO:0019789
Zm00001d047354	GO:0001650
Zm00001d047354	GO:0016925
Zm00001d047354	GO:0051091
Zm00001d047354	GO:0031625
Zm00001d047354	GO:0019048
Zm00001d047354	GO:0045202
Zm00001d047354	GO:0051301
Zm00001d047354	GO:0061630
Zm00001d047354	GO:0007067
Zm00001d045679	GO:0006631
Zm00001d045679	GO:0042180
Zm00001d045679	GO:0015996
Zm00001d045679	GO:0019761
Zm00001d045679	GO:0018858
Zm00001d045679	GO:0008756
Zm00001d045679	GO:0005777
Zm00001d045679	GO:0016138
Zm00001d049607	GO:0016021
Zm00001d049607	GO:0050789
Zm00001d049607	GO:0048513
Zm00001d049607	GO:0005794
Zm00001d049607	GO:0006468
Zm00001d049607	GO:0016758
Zm00001d049606	GO:0009451
Zm00001d049606	GO:0090305
Zm00001d049606	GO:0008270
Zm00001d049606	GO:0016020
Zm00001d049606	GO:0005739
Zm00001d049606	GO:0009507
Zm00001d049606	GO:0003723
Zm00001d049606	GO:0004519
Zm00001d049605	GO:0051567
Zm00001d049605	GO:0006306
Zm00001d049605	GO:0009616
Zm00001d049605	GO:0006260
Zm00001d049605	GO:0004386
Zm00001d049605	GO:0050832
Zm00001d049605	GO:0003677
Zm00001d049605	GO:0005524
Zm00001d049605	GO:0010267
Zm00001d049605	GO:0006342
Zm00001d049605	GO:0008283
Zm00001d049605	GO:0007267
Zm00001d049605	GO:0010050
Zm00001d049605	GO:0035196
Zm00001d042652	GO:0007166
Zm00001d042652	GO:0008375
Zm00001d042652	GO:0016021
Zm00001d042652	GO:0048513
Zm00001d042652	GO:0048519
Zm00001d042652	GO:0051056
Zm00001d042652	GO:0009653
Zm00001d042652	GO:0065009
Zm00001d042652	GO:0065008
Zm00001d042652	GO:0050793
Zm00001d042652	GO:0046903
Zm00001d042652	GO:0051239
Zm00001d042652	GO:0030154
Zm00001d042652	GO:0030817
Zm00001d042652	GO:0008283
Zm00001d049603	GO:0008270
Zm00001d049603	GO:0016570
Zm00001d049603	GO:0007064
Zm00001d049603	GO:0006342
Zm00001d049603	GO:0032502
Zm00001d049603	GO:0032501
Zm00001d049603	GO:0003682
Zm00001d049602	GO:0019226
Zm00001d049602	GO:0030203
Zm00001d049602	GO:0007165
Zm00001d049602	GO:0005737
Zm00001d049602	GO:0016021
Zm00001d049602	GO:0006810
Zm00001d049602	GO:0016787
Zm00001d049602	GO:0005634
Zm00001d049602	GO:0016757
Zm00001d049601	GO:0030170
Zm00001d049601	GO:0004058
Zm00001d049601	GO:0004837
Zm00001d049601	GO:0005737
Zm00001d049601	GO:0006520
Zm00001d049601	GO:0009611
Zm00001d049601	GO:0042180
Zm00001d049601	GO:0044106
Zm00001d049600	GO:0055075
Zm00001d049600	GO:0016021
Zm00001d049600	GO:0005774
Zm00001d049600	GO:0006814
Zm00001d049600	GO:0015385
Zm00001d049600	GO:1902600
Zm00001d049600	GO:0005886
Zm00001d049600	GO:0009651
Zm00001d049600	GO:0009987
Zm00001d049600	GO:0007275
Zm00001d042659	GO:0005783
Zm00001d042659	GO:0005773
Zm00001d042659	GO:0016043
Zm00001d042659	GO:0004612
Zm00001d042659	GO:0065007
Zm00001d042659	GO:0006810
Zm00001d042659	GO:0006094
Zm00001d042659	GO:0005524
Zm00001d042659	GO:0006468
Zm00001d042659	GO:0016021
Zm00001d042658	GO:0016021
Zm00001d042658	GO:0048646
Zm00001d042658	GO:0016787
Zm00001d042658	GO:0048767
Zm00001d042658	GO:0006950
Zm00001d042658	GO:0044238
Zm00001d042658	GO:0009913
Zm00001d042658	GO:0044237
Zm00001d042658	GO:0048527
Zm00001d042658	GO:0002238
Zm00001d042658	GO:0005488
Zm00001d049608	GO:0010048
Zm00001d049608	GO:0005677
Zm00001d049608	GO:2000014
Zm00001d049608	GO:0016571
Zm00001d049608	GO:0035098
Zm00001d049608	GO:0006355
Zm00001d049608	GO:0006349
Zm00001d049608	GO:0005730
Zm00001d049608	GO:0043078
Zm00001d049608	GO:0042054
Zm00001d049608	GO:0001739
Zm00001d049608	GO:0045120
Zm00001d045672	GO:0019226
Zm00001d045672	GO:0003676
Zm00001d045672	GO:0050801
Zm00001d045672	GO:0008066
Zm00001d045672	GO:0006810
Zm00001d045672	GO:0050794
Zm00001d045672	GO:0007268
Zm00001d045672	GO:0044238
Zm00001d045672	GO:0050896
Zm00001d045672	GO:0046983
Zm00001d045673	GO:0016021
Zm00001d045673	GO:0006260
Zm00001d045673	GO:0005829
Zm00001d045673	GO:0006366
Zm00001d045673	GO:0004535
Zm00001d045673	GO:0006355
Zm00001d045673	GO:0019252
Zm00001d045673	GO:0007049
Zm00001d045673	GO:0003723
Zm00001d045673	GO:0090305
Zm00001d045673	GO:0000023
Zm00001d045673	GO:0045934
Zm00001d045673	GO:0015030
Zm00001d045670	GO:0005789
Zm00001d045670	GO:0044237
Zm00001d045670	GO:0016043
Zm00001d045670	GO:0033036
Zm00001d045670	GO:0006810
Zm00001d045670	GO:0005215
Zm00001d045670	GO:0044238
Zm00001d045670	GO:0016758
Zm00001d039204	GO:0044710
Zm00001d039204	GO:0005730
Zm00001d039204	GO:0016043
Zm00001d039204	GO:0065007
Zm00001d039204	GO:0042274
Zm00001d039204	GO:0000469
Zm00001d039204	GO:0048856
Zm00001d039206	GO:0006473
Zm00001d039206	GO:0044710
Zm00001d039206	GO:0043565
Zm00001d039206	GO:0051716
Zm00001d039206	GO:0006950
Zm00001d039206	GO:0046983
Zm00001d039206	GO:0005634
Zm00001d039206	GO:0045893
Zm00001d039206	GO:0042221
Zm00001d039206	GO:0003700
Zm00001d045677	GO:0016810
Zm00001d045677	GO:0044237
Zm00001d045677	GO:0006807
Zm00001d045677	GO:0005488
Zm00001d045677	GO:0016021
Zm00001d015141	GO:0016021
Zm00001d015141	GO:0006661
Zm00001d015141	GO:0005524
Zm00001d015141	GO:0005634
Zm00001d015141	GO:0032502
Zm00001d015141	GO:0032501
Zm00001d015141	GO:0003723
Zm00001d015141	GO:0006520
Zm00001d015141	GO:0050789
Zm00001d015141	GO:0004672
Zm00001d015141	GO:0006468
Zm00001d015141	GO:0016874
Zm00001d015141	GO:0006414
Zm00001d015140	GO:0009966
Zm00001d015140	GO:0042221
Zm00001d015140	GO:0007049
Zm00001d015140	GO:0016301
Zm00001d015140	GO:0006955
Zm00001d015140	GO:0006950
Zm00001d015140	GO:0004860
Zm00001d015140	GO:0006469
Zm00001d015140	GO:0006915
Zm00001d015140	GO:0007266
Zm00001d015140	GO:0048522
Zm00001d052144	GO:0016310
Zm00001d052144	GO:0003676
Zm00001d052144	GO:0016021
Zm00001d052144	GO:0030529
Zm00001d052144	GO:0019013
Zm00001d052144	GO:0046872
Zm00001d052144	GO:0006355
Zm00001d019155	GO:0031323
Zm00001d019155	GO:0007165
Zm00001d019155	GO:0007275
Zm00001d019155	GO:0044260
Zm00001d019155	GO:0048869
Zm00001d019155	GO:0006950
Zm00001d019155	GO:0045735
Zm00001d036740	GO:0071944
Zm00001d036740	GO:0016020
Zm00001d036740	GO:0016043
Zm00001d036740	GO:0016740
Zm00001d036740	GO:0005856
Zm00001d036740	GO:0050794
Zm00001d036740	GO:0044767
Zm00001d036740	GO:0012505
Zm00001d036740	GO:0023052
Zm00001d036740	GO:0042995
Zm00001d036740	GO:0051179
Zm00001d036740	GO:0009507
Zm00001d036740	GO:0050896
Zm00001d036740	GO:0048856
Zm00001d036740	GO:0044763
Zm00001d036740	GO:0044422
Zm00001d036741	GO:0004822
Zm00001d036741	GO:0005829
Zm00001d036741	GO:0006450
Zm00001d036741	GO:0002161
Zm00001d036741	GO:0005524
Zm00001d036741	GO:0006428
Zm00001d036741	GO:0010498
Zm00001d036741	GO:0009651
Zm00001d036741	GO:0000049
Zm00001d036741	GO:0005634
Zm00001d036741	GO:0006096
Zm00001d036741	GO:0046686
Zm00001d036741	GO:0006094
Zm00001d036741	GO:0007010
Zm00001d036742	GO:0008270
Zm00001d036742	GO:0032440
Zm00001d036742	GO:0005794
Zm00001d036742	GO:0016567
Zm00001d036742	GO:0050794
Zm00001d036742	GO:0006952
Zm00001d036742	GO:0016021
Zm00001d036742	GO:0019706
Zm00001d036742	GO:0009932
Zm00001d036742	GO:0010029
Zm00001d036742	GO:0005886
Zm00001d036742	GO:0018345
Zm00001d015146	GO:0019222
Zm00001d015146	GO:0003678
Zm00001d015146	GO:0000723
Zm00001d015146	GO:0005839
Zm00001d015146	GO:0006281
Zm00001d015146	GO:0006261
Zm00001d015146	GO:0032508
Zm00001d015146	GO:0050794
Zm00001d015146	GO:0008094
Zm00001d015146	GO:0005488
Zm00001d015148	GO:0016021
Zm00001d015148	GO:0051641
Zm00001d015148	GO:0005634
Zm00001d015148	GO:0051234
Zm00001d015148	GO:0009507
Zm00001d015148	GO:0050789
Zm00001d015148	GO:0006413
Zm00001d015148	GO:0003743
Zm00001d036748	GO:0030246
Zm00001d036748	GO:0006888
Zm00001d036748	GO:0004180
Zm00001d036748	GO:0072546
Zm00001d036748	GO:0009507
Zm00001d036748	GO:0001676
Zm00001d036748	GO:0043170
Zm00001d036748	GO:0031301
Zm00001d036748	GO:0006007
Zm00001d036749	GO:0016137
Zm00001d036749	GO:0016157
Zm00001d036749	GO:0047947
Zm00001d036749	GO:0016021
Zm00001d036749	GO:0005985
Zm00001d036749	GO:0046524
Zm00001d036749	GO:0065007
Zm00001d036749	GO:0009058
Zm00001d036749	GO:0005886
Zm00001d036749	GO:0042221
Zm00001d036749	GO:0019538
Zm00001d036749	GO:0006950
Zm00001d019150	GO:0009615
Zm00001d019150	GO:0016021
Zm00001d019150	GO:0048513
Zm00001d019150	GO:0016746
Zm00001d019150	GO:0000911
Zm00001d019150	GO:0000226
Zm00001d019150	GO:0051322
Zm00001d019150	GO:0031540
Zm00001d019150	GO:0010075
Zm00001d019150	GO:0044237
Zm00001d019150	GO:0008283
Zm00001d019150	GO:0046686
Zm00001d019150	GO:0000279
Zm00001d019150	GO:0010224
Zm00001d019150	GO:0009506
Zm00001d019150	GO:0009627
Zm00001d019150	GO:0005576
Zm00001d019150	GO:2000026
Zm00001d015862	GO:0007165
Zm00001d015862	GO:0048513
Zm00001d015862	GO:0016570
Zm00001d015862	GO:0009891
Zm00001d015862	GO:0009653
Zm00001d015862	GO:0030154
Zm00001d015862	GO:0010646
Zm00001d015862	GO:0045892
Zm00001d015862	GO:0010628
Zm00001d015862	GO:0045935
Zm00001d005282	GO:0016021
Zm00001d005282	GO:0060255
Zm00001d005282	GO:0030692
Zm00001d005282	GO:0004930
Zm00001d005282	GO:0044260
Zm00001d005282	GO:0050896
Zm00001d005282	GO:0023052
Zm00001d005282	GO:0005730
Zm00001d005282	GO:0048731
Zm00001d005282	GO:0032040
Zm00001d005282	GO:0031323
Zm00001d005282	GO:0009116
Zm00001d005282	GO:0005886
Zm00001d005282	GO:0070652
Zm00001d005282	GO:0048522
Zm00001d026609	GO:0006139
Zm00001d026609	GO:0044260
Zm00001d026609	GO:0005739
Zm00001d026609	GO:0003735
Zm00001d026609	GO:0009058
Zm00001d026609	GO:0009409
Zm00001d026609	GO:0009507
Zm00001d026609	GO:0005488
Zm00001d015860	GO:0009595
Zm00001d015860	GO:0009697
Zm00001d015860	GO:0055114
Zm00001d015860	GO:0046872
Zm00001d015860	GO:0050832
Zm00001d015860	GO:0010363
Zm00001d015860	GO:0009693
Zm00001d015860	GO:0009862
Zm00001d015860	GO:0009867
Zm00001d015860	GO:0010310
Zm00001d015860	GO:0009815
Zm00001d015860	GO:0009651
Zm00001d015860	GO:0016706
Zm00001d015860	GO:0071398
Zm00001d015860	GO:0010200
Zm00001d015860	GO:0009835
Zm00001d015860	GO:0009727
Zm00001d015860	GO:0005618
Zm00001d015860	GO:0019748
Zm00001d015860	GO:0005886
Zm00001d015860	GO:0044238
Zm00001d015860	GO:0009743
Zm00001d015866	GO:0008234
Zm00001d015866	GO:0016043
Zm00001d015866	GO:0050789
Zm00001d015866	GO:0006508
Zm00001d015866	GO:0048731
Zm00001d015867	GO:0019226
Zm00001d015867	GO:0051649
Zm00001d015867	GO:0016798
Zm00001d015867	GO:0044249
Zm00001d015867	GO:0005730
Zm00001d015867	GO:0016021
Zm00001d015867	GO:0006887
Zm00001d015867	GO:0016740
Zm00001d015867	GO:0050794
Zm00001d015867	GO:0007268
Zm00001d015867	GO:0015031
Zm00001d015867	GO:0007275
Zm00001d043298	GO:0016310
Zm00001d043298	GO:0016043
Zm00001d043298	GO:0005524
Zm00001d043298	GO:0006810
Zm00001d043298	GO:0051641
Zm00001d043298	GO:0016301
Zm00001d043298	GO:0016021
Zm00001d043299	GO:0016021
Zm00001d043299	GO:0006364
Zm00001d043299	GO:0005488
Zm00001d043299	GO:0003824
Zm00001d043299	GO:0042549
Zm00001d043299	GO:0009657
Zm00001d043299	GO:0010207
Zm00001d043299	GO:0009523
Zm00001d043299	GO:0009535
Zm00001d043299	GO:0042221
Zm00001d043299	GO:0051179
Zm00001d043296	GO:0001076
Zm00001d043296	GO:0044281
Zm00001d043296	GO:0016593
Zm00001d043296	GO:0009966
Zm00001d043296	GO:0048518
Zm00001d043296	GO:0048519
Zm00001d043296	GO:0016570
Zm00001d043296	GO:0003677
Zm00001d043296	GO:0006368
Zm00001d043296	GO:0043414
Zm00001d043296	GO:0006355
Zm00001d043296	GO:0006352
Zm00001d043296	GO:1990269
Zm00001d043296	GO:0007275
Zm00001d043296	GO:0040007
Zm00001d043294	GO:0003676
Zm00001d043294	GO:0016021
Zm00001d043294	GO:0016579
Zm00001d043294	GO:0050794
Zm00001d043294	GO:0036459
Zm00001d043294	GO:0048856
Zm00001d043294	GO:0006511
Zm00001d015865	GO:0003677
Zm00001d015865	GO:0005634
Zm00001d015865	GO:0003899
Zm00001d015865	GO:0009507
Zm00001d015865	GO:0046907
Zm00001d015865	GO:0022402
Zm00001d015865	GO:0048856
Zm00001d015865	GO:0050789
Zm00001d015865	GO:0006351
Zm00001d015865	GO:0000226
Zm00001d043292	GO:0008285
Zm00001d043292	GO:0090304
Zm00001d043292	GO:0005737
Zm00001d043292	GO:0044260
Zm00001d043292	GO:0016043
Zm00001d043292	GO:0005654
Zm00001d043292	GO:0010467
Zm00001d043292	GO:0016459
Zm00001d043292	GO:0016787
Zm00001d043292	GO:0000166
Zm00001d043292	GO:0003682
Zm00001d043293	GO:0019139
Zm00001d043293	GO:0009694
Zm00001d043293	GO:0071840
Zm00001d043293	GO:0009753
Zm00001d043293	GO:0005773
Zm00001d043293	GO:0016021
Zm00001d043293	GO:0022900
Zm00001d043293	GO:0048507
Zm00001d043293	GO:0008762
Zm00001d043293	GO:0044036
Zm00001d043293	GO:0010089
Zm00001d043293	GO:0031410
Zm00001d043293	GO:0048513
Zm00001d043293	GO:0032940
Zm00001d043293	GO:0050660
Zm00001d043293	GO:0009823
Zm00001d043293	GO:0005615
Zm00001d043293	GO:0009536
Zm00001d043293	GO:0051649
Zm00001d043290	GO:0009941
Zm00001d043290	GO:0016043
Zm00001d043290	GO:0016787
Zm00001d043290	GO:0044267
Zm00001d043290	GO:0043412
Zm00001d043290	GO:0005488
Zm00001d043291	GO:0016311
Zm00001d043291	GO:0016021
Zm00001d043291	GO:0046872
Zm00001d043291	GO:0009505
Zm00001d043291	GO:0009506
Zm00001d043291	GO:0005829
Zm00001d043291	GO:0016036
Zm00001d043291	GO:0005576
Zm00001d043291	GO:0003993
Zm00001d006844	GO:0016597
Zm00001d006844	GO:0070647
Zm00001d006844	GO:0004672
Zm00001d006844	GO:0005524
Zm00001d006844	GO:0032502
Zm00001d006844	GO:0006468
Zm00001d006844	GO:0050794
Zm00001d006844	GO:0009056
Zm00001d006844	GO:0006996
Zm00001d006844	GO:0005829
Zm00001d006844	GO:0006950
Zm00001d006845	GO:0019915
Zm00001d006845	GO:0009845
Zm00001d006845	GO:0006606
Zm00001d006845	GO:0005829
Zm00001d006845	GO:0009793
Zm00001d006845	GO:0016567
Zm00001d006845	GO:0010162
Zm00001d006845	GO:0050826
Zm00001d006845	GO:0008565
Zm00001d006845	GO:0042254
Zm00001d006845	GO:0005654
Zm00001d006845	GO:0016363
Zm00001d006845	GO:0010014
Zm00001d006845	GO:0016070
Zm00001d006845	GO:0005643
Zm00001d006845	GO:0015932
Zm00001d006845	GO:0000049
Zm00001d006845	GO:0009640
Zm00001d006845	GO:0008536
Zm00001d006845	GO:0071528
Zm00001d006845	GO:0005487
Zm00001d006845	GO:0010182
Zm00001d006845	GO:0009909
Zm00001d006845	GO:0006406
Zm00001d006845	GO:0010228
Zm00001d006845	GO:0006499
Zm00001d006846	GO:0007275
Zm00001d006846	GO:0003676
Zm00001d006846	GO:0016021
Zm00001d006846	GO:0050794
Zm00001d006846	GO:0015074
Zm00001d006840	GO:0008270
Zm00001d006840	GO:0035556
Zm00001d006840	GO:0005779
Zm00001d006840	GO:0016558
Zm00001d006840	GO:0032502
Zm00001d006840	GO:0032501
Zm00001d006840	GO:0044238
Zm00001d006840	GO:0044237
Zm00001d006841	GO:0016021
Zm00001d006841	GO:0065007
Zm00001d006841	GO:0016787
Zm00001d006841	GO:0006352
Zm00001d006842	GO:0030014
Zm00001d006842	GO:0008270
Zm00001d006842	GO:0003676
Zm00001d006842	GO:0009415
Zm00001d006842	GO:0008168
Zm00001d006842	GO:0044260
Zm00001d006842	GO:0044238
Zm00001d006842	GO:0006950
Zm00001d006842	GO:0005829
Zm00001d006842	GO:0004190
Zm00001d006843	GO:0051252
Zm00001d006843	GO:0008270
Zm00001d006843	GO:0008380
Zm00001d006843	GO:0048869
Zm00001d006843	GO:0016021
Zm00001d006843	GO:0070647
Zm00001d006843	GO:0010468
Zm00001d006843	GO:0005524
Zm00001d006843	GO:0006468
Zm00001d006843	GO:0009059
Zm00001d006843	GO:0003723
Zm00001d006843	GO:0007275
Zm00001d006843	GO:0044249
Zm00001d006848	GO:0019773
Zm00001d006848	GO:0006807
Zm00001d006848	GO:0003677
Zm00001d006848	GO:0005737
Zm00001d006848	GO:0005634
Zm00001d006848	GO:0065007
Zm00001d006848	GO:0009058
Zm00001d006848	GO:0004298
Zm00001d006848	GO:0006511
Zm00001d006849	GO:0019222
Zm00001d006849	GO:0003678
Zm00001d006849	GO:0008234
Zm00001d006849	GO:0000723
Zm00001d006849	GO:0005839
Zm00001d006849	GO:0006281
Zm00001d006849	GO:0006261
Zm00001d006849	GO:0032508
Zm00001d006849	GO:0050794
Zm00001d006849	GO:0008094
Zm00001d006849	GO:0005488
Zm00001d011246	GO:0009691
Zm00001d011246	GO:0048864
Zm00001d011246	GO:0048513
Zm00001d011246	GO:0005829
Zm00001d011246	GO:0004844
Zm00001d011246	GO:0016070
Zm00001d011246	GO:0070887
Zm00001d011246	GO:0005634
Zm00001d011246	GO:0010083
Zm00001d011246	GO:0045596
Zm00001d011246	GO:0010076
Zm00001d011246	GO:0010077
Zm00001d011246	GO:0048832
Zm00001d011246	GO:0009536
Zm00001d044111	GO:0044238
Zm00001d044111	GO:0016787
Zm00001d044111	GO:0016021
Zm00001d044111	GO:0044237
Zm00001d044111	GO:0050896
Zm00001d011244	GO:0016020
Zm00001d011244	GO:0080167
Zm00001d011244	GO:0005829
Zm00001d011244	GO:0016787
Zm00001d011244	GO:0009704
Zm00001d011244	GO:0005634
Zm00001d011244	GO:1901601
Zm00001d011244	GO:0006974
Zm00001d011244	GO:0045892
Zm00001d011244	GO:0042981
Zm00001d011244	GO:0006464
Zm00001d011244	GO:0010223
Zm00001d011244	GO:0006996
Zm00001d011244	GO:0006259
Zm00001d011244	GO:0048522
Zm00001d011245	GO:0030583
Zm00001d011245	GO:0006909
Zm00001d011245	GO:0006907
Zm00001d011245	GO:0008270
Zm00001d011245	GO:0015979
Zm00001d011245	GO:0042331
Zm00001d011245	GO:0016020
Zm00001d011245	GO:0046034
Zm00001d011245	GO:0065007
Zm00001d011245	GO:0032259
Zm00001d011245	GO:0030435
Zm00001d011245	GO:0019899
Zm00001d011245	GO:0031154
Zm00001d011245	GO:0044249
Zm00001d011245	GO:0005739
Zm00001d011245	GO:0006536
Zm00001d011245	GO:0035243
Zm00001d011245	GO:0005615
Zm00001d011245	GO:0032981
Zm00001d011245	GO:0045333
Zm00001d011245	GO:0051641
Zm00001d011245	GO:0005977
Zm00001d011245	GO:0043052
Zm00001d011242	GO:0009409
Zm00001d011242	GO:0009853
Zm00001d011242	GO:0005774
Zm00001d011242	GO:1903959
Zm00001d011242	GO:0051788
Zm00001d011242	GO:0042742
Zm00001d011242	GO:0009941
Zm00001d011242	GO:0050794
Zm00001d011242	GO:0046930
Zm00001d011242	GO:0008308
Zm00001d011242	GO:0015288
Zm00001d011242	GO:0080129
Zm00001d011242	GO:0005730
Zm00001d011242	GO:0009527
Zm00001d011242	GO:0005741
Zm00001d011242	GO:0010029
Zm00001d011242	GO:0022839
Zm00001d011242	GO:0005618
Zm00001d011242	GO:0006511
Zm00001d011242	GO:0005886
Zm00001d011243	GO:0008270
Zm00001d011243	GO:0005815
Zm00001d011243	GO:0016021
Zm00001d011243	GO:2001020
Zm00001d011243	GO:1902532
Zm00001d011243	GO:0043069
Zm00001d011243	GO:0000375
Zm00001d011243	GO:0005684
Zm00001d011243	GO:0006397
Zm00001d044116	GO:0019221
Zm00001d044116	GO:0000166
Zm00001d044116	GO:0005829
Zm00001d044116	GO:0043130
Zm00001d044116	GO:0005856
Zm00001d044116	GO:0044260
Zm00001d044116	GO:0080008
Zm00001d044116	GO:0005640
Zm00001d044116	GO:0000972
Zm00001d044116	GO:0006139
Zm00001d044116	GO:0046930
Zm00001d044116	GO:0005730
Zm00001d044116	GO:0071407
Zm00001d044116	GO:0005643
Zm00001d044116	GO:0003723
Zm00001d044116	GO:0010827
Zm00001d044116	GO:0006406
Zm00001d044116	GO:0006606
Zm00001d044117	GO:0003677
Zm00001d044117	GO:0005634
Zm00001d044117	GO:0032501
Zm00001d044117	GO:0003700
Zm00001d044117	GO:0006355
Zm00001d044117	GO:0003682
Zm00001d044118	GO:0080090
Zm00001d044118	GO:0090304
Zm00001d044118	GO:0003677
Zm00001d044118	GO:0005634
Zm00001d044118	GO:0010467
Zm00001d044118	GO:0050794
Zm00001d044118	GO:0034645
Zm00001d044119	GO:0016021
Zm00001d044119	GO:0006833
Zm00001d044119	GO:0003824
Zm00001d044119	GO:0009266
Zm00001d044119	GO:0050897
Zm00001d044119	GO:0009651
Zm00001d044119	GO:0005739
Zm00001d044119	GO:0006972
Zm00001d044119	GO:0045454
Zm00001d044119	GO:0007030
Zm00001d044119	GO:0006007
Zm00001d044119	GO:0006096
Zm00001d044119	GO:0046686
Zm00001d011248	GO:0003678
Zm00001d011248	GO:0008234
Zm00001d011248	GO:0000723
Zm00001d011248	GO:0005618
Zm00001d011248	GO:0016021
Zm00001d011248	GO:0006508
Zm00001d011248	GO:0006281
Zm00001d011248	GO:0032508
Zm00001d011248	GO:0009058
Zm00001d011248	GO:0005488
Zm00001d015527	GO:0007166
Zm00001d015527	GO:0044710
Zm00001d015527	GO:0016021
Zm00001d015527	GO:0004675
Zm00001d015527	GO:0005524
Zm00001d015527	GO:0006468
Zm00001d015527	GO:0005886
Zm00001d015527	GO:0007275
Zm00001d045869	GO:0003678
Zm00001d045869	GO:0008234
Zm00001d045869	GO:0000723
Zm00001d045869	GO:0005618
Zm00001d045869	GO:0006281
Zm00001d045869	GO:0070647
Zm00001d045869	GO:0050789
Zm00001d045869	GO:0006508
Zm00001d045869	GO:0032508
Zm00001d045869	GO:0005488
Zm00001d045868	GO:0019222
Zm00001d045868	GO:0003678
Zm00001d045868	GO:0000723
Zm00001d045868	GO:0006281
Zm00001d045868	GO:0006261
Zm00001d045868	GO:0032508
Zm00001d045868	GO:0050794
Zm00001d045868	GO:0008094
Zm00001d045867	GO:0044249
Zm00001d045867	GO:0003678
Zm00001d045867	GO:0016020
Zm00001d045867	GO:0000723
Zm00001d045867	GO:0006281
Zm00001d045867	GO:0032508
Zm00001d045867	GO:0008234
Zm00001d045867	GO:0005840
Zm00001d045867	GO:0005488
Zm00001d045865	GO:0016021
Zm00001d045865	GO:0005829
Zm00001d045865	GO:0042147
Zm00001d045865	GO:0006355
Zm00001d045865	GO:0010557
Zm00001d045865	GO:0055037
Zm00001d045865	GO:0007275
Zm00001d045865	GO:0045935
Zm00001d045865	GO:0006996
Zm00001d045865	GO:0000938
[truncated: 432,990+ more rows]
