# Supplementary material for: PNGSeqR: An R Package for Rapid Candidate Gene Selection through Pooled Next-Generation Sequencing
Source: Plants (Basel). 2022 Jul 11;11(14):1821. doi: 10.3390/plants11141821 (PMC9315718; doi:10.3390/plants11141821)
Supplement: Supplementary file 1 [file plants-11-01821-s001.zip › Table S4.xlsx]

## Sheet: Sheet1
Table S4. The list of genes in the candidate region on chromosome 8.
Chroma	Startb	Endc	Gened
8	77622	80307	Zm00001d008171
8	116265	116816	Zm00001d008172
8	177310	178785	Zm00001d008173
8	256295	258840	Zm00001d008174
8	327385	327639	Zm00001d008175
8	327598	335271	Zm00001d008176
8	426162	442573	Zm00001d008177
8	557425	565138	Zm00001d008178
8	563764	569489	Zm00001d008179
8	622332	625467	Zm00001d008181
8	629637	630614	Zm00001d008182
8	635223	636911	Zm00001d008184
8	638373	640008	Zm00001d008185
8	641692	642591	Zm00001d008186
8	683269	684645	Zm00001d008187
8	736633	747889	Zm00001d008188
8	750335	754216	Zm00001d008189
8	774348	784221	Zm00001d008190
8	778215	779122	Zm00001d008191
8	812257	812739	Zm00001d008192
8	824488	829600	Zm00001d008193
8	840652	840912	Zm00001d008194
8	889078	889854	Zm00001d008195
8	909115	910111	Zm00001d008196
8	957005	966468	Zm00001d008198
8	972253	973110	Zm00001d008199
8	985128	985854	Zm00001d008200
8	989823	991128	Zm00001d008201
8	1019559	1026656	Zm00001d008203
8	1077606	1080652	Zm00001d008205
8	1108702	1109418	Zm00001d008206
8	1236271	1237892	Zm00001d008208
8	1238180	1242266	Zm00001d008209
8	1296796	1298016	Zm00001d008210
8	1299092	1300668	Zm00001d008211
8	1355056	1359064	Zm00001d008212
8	1452949	1453365	Zm00001d008213
8	1454272	1456128	Zm00001d008214
8	1460764	1465581	Zm00001d008215
8	1519035	1519335	Zm00001d007981
8	1519080	1521275	Zm00001d008216
8	1585465	1591623	Zm00001d008218
8	1592384	1593037	Zm00001d008219
8	1656468	1659625	Zm00001d008221
8	1660931	1663039	Zm00001d008222
8	1663801	1665182	Zm00001d008223
8	1665296	1669410	Zm00001d008224
8	1785019	1794777	Zm00001d008225
8	1889016	1893402	Zm00001d008226
8	1969000	1975048	Zm00001d008227
8	1976413	1976953	Zm00001d007982
8	1976472	1977821	Zm00001d008228
8	1983066	1984497	Zm00001d008229
8	2034108	2036318	Zm00001d008230
8	2056150	2057320	Zm00001d008232
8	2062566	2071530	Zm00001d008233
8	2073600	2080812	Zm00001d008234
8	2109803	2110486	Zm00001d008235
8	2198415	2206591	Zm00001d008236
8	2224750	2226261	Zm00001d008237
8	2256303	2260962	Zm00001d008238
8	2300946	2302639	Zm00001d008239
8	2337073	2340280	Zm00001d008240
8	2344441	2344857	Zm00001d008241
8	2424564	2438283	Zm00001d008242
8	2452376	2459944	Zm00001d008244
8	2490496	2493628	Zm00001d008245
8	2491319	2491411	ENSRNA049475115
8	2491899	2491994	ENSRNA049475138
8	2554810	2554908	ENSRNA049475128
8	2555038	2555123	ENSRNA049475135
8	2557493	2557565	Zm00001d008246
8	2558680	2558752	Zm00001d008247
8	2562419	2568575	Zm00001d008248
8	2564700	2565090	Zm00001d007983
8	2667303	2674772	Zm00001d008249
8	2675558	2678405	Zm00001d008250
8	2928345	2930423	Zm00001d008251
8	2956391	2956463	Zm00001d008252
8	2956391	2956463	ENSRNA049449201
8	2957520	2957592	Zm00001d008253
8	2988927	2988999	Zm00001d008254
8	2988927	2988999	ENSRNA049449193
8	3114456	3117313	Zm00001d008255
8	3193712	3222186	Zm00001d008256
8	3280306	3293112	Zm00001d008257
8	3332452	3335358	Zm00001d008258
8	3340627	3344777	Zm00001d008259
8	3371971	3373452	Zm00001d008260
8	3372026	3373452	Zm00001d008261
8	3373545	3380186	Zm00001d008262
8	3417091	3420084	Zm00001d008264
Notes: a: The chromosome that contains the candidate region; b: The start position of the candidate genes; c: The end position of the candidate genes; d: The gene IDs are based on maize B73 reference genome Version 4.
