# Supplementary material for: PNGSeqR: An R Package for Rapid Candidate Gene Selection through Pooled Next-Generation Sequencing
Source: Plants (Basel). 2022 Jul 11;11(14):1821. doi: 10.3390/plants11141821 (PMC9315718; doi:10.3390/plants11141821)
Supplement: Supplementary file 1 [file plants-11-01821-s001.zip › Table S5.xlsx]

## Sheet: Sheet1
Table S5. QTLs detected for cold-tolerance in a rice RIL population by PNGseqR
Chroma	EDb			Delta SNPc			G-testd
	start	end	size	startc	end	size	start	end	size
4	5538952	6301789	0.76	5530293	6358599	0.83	6008947	6190246	0.18
4	21351776	23690433	2.34	21022259	23690433	2.67	20807119	26536324	5.72
5	-	-	-	-	-	-	15308462	16073535	0.76
5	18982109	19315761	0.33	19093586	19569783	0.48	18072326	19253326	1.18
6	5374128	6925741	1.55	5266558	6998999	1.73	5232094	6998999	1.77
6	21795036	24678957	2.88	21765365	24678957	2.91	23312743	24797776	1.49
6	-	-	-	-	-	-	27209983	27489404	0.28
11	23893333	24442346	0.55	23893982	24442346	0.55	21712403	24319064	2.6
Total	-	-	8.41	-	-	9.17	-	-	13.99
Notes: For each statistic, the threshold for identifying QTL is quantile > 95%); a: The chromosomes containing the candidate regions; b: The candidate regions identified by ΔSNP in PNGseqR; c: The candidate regions identified by G-test in PNGseqR; d: The candidate regions identified by Euclidean distance in PNGseqR; start, end, and size indicate the start position, end position, and size of the c…
