# Supplementary material for: PNGSeqR: An R Package for Rapid Candidate Gene Selection through Pooled Next-Generation Sequencing
Source: Plants (Basel). 2022 Jul 11;11(14):1821. doi: 10.3390/plants11141821 (PMC9315718; doi:10.3390/plants11141821)
Supplement: Supplementary file 1 [file plants-11-01821-s001.zip › Table S6.xlsx]

## Sheet: Sheet1
Table S6. The candidate region for maize small kernel mutant identified by PNGseqR (based on B73 version3 reference genome)
	Criteriaa		Methodsb	Chromc	Startd	Ende	Lengthf
					——————Mb——————
	P-value	0.01	Bayes	8	0.17	10.88	10.71
			ED	8	0.17	10.29	10.12
			ΔSNP	8	0.17	9.63	9.46
			Gprime	8	0.17	10.88	10.71
		0.005	Bayes	8	0.17	9	8.83
			ED	8	0.17	9.9	9.73
			ΔSNP	8	0.17	9	8.83
			Gprime	8	0.17	8.86	8.69
		0.001	Bayes	8	0.17	2.52	2.35
			ED	8	0.17	3.2	3.03
			ΔSNP	8	0.17	3.3	3.13
			Gprime	8	0.17	2.52	2.35
	Quantile	0.99	Bayes	8	0.17	10.88	10.71
			ED	8	0.17	10.29	10.12
			ΔSNP	8	0.17	9.63	9.46
			Gprime	8	0.17	10.29	10.12
		0.995	Bayes	8	0.17	10.12	9.95
			ED	8	0.17	10.08	9.91
			ΔSNP	8	0.17	9	8.83
			Gprime	8	0.17	10.12	9.95
		0.999	Bayes	8	0.17	3.12	2.95
			ED	8	0.17	3.12	2.95
			ΔSNP	8	0.17	3.12	2.95
			Gprime	8	0.17	3.12	2.95
Notes: a: Multiple thresholds were used to declare the candidate region by defining P-value and quantile; b: The statistics used to identify the candidate region; c: The chromosome that contains the candidate region; d: The start position of the candidate region; e: The end position of the candidate region; f: The length of the candidate region
