# Supplementary material for: PNGSeqR: An R Package for Rapid Candidate Gene Selection through Pooled Next-Generation Sequencing
Source: Plants (Basel). 2022 Jul 11;11(14):1821. doi: 10.3390/plants11141821 (PMC9315718; doi:10.3390/plants11141821)
Supplement: Supplementary file 1 [file plants-11-01821-s001.zip › Table S7.xlsx]

## Sheet: Sheet1
Table S7. The candidate region for maize small kernel mutant identified by PNGseqR (using 1/5 RNA-seq reads)
	Criteriaa		Methodsb	Chromc	Startd	Ende	Lengthf
					——————Mb——————
	P-value	0.01	Bayes	8	0.99	11.94	10.95
			ED	8	0.99	10.65	9.66
			ΔSNP	8	0.99	8.82	7.83
			Gprime	8	0.99	8.82	7.83
		0.005	Bayes	8	0.99	10.21	9.22
			ED	8	0.99	8.82	7.83
			ΔSNP	8	0.99	8.82	7.83
			Gprime	8	0.99	8.82	7.83
		0.001	Bayes	8	0.99	0.99	<0.01
			ED	8	0.99	2.2	1.21
			ΔSNP	8	0.99	8.46	7.47
			Gprime	8	1.46	5.94	4.48
	Quantile	0.99	Bayes	8	0.99	11.94	10.95
			ED	8	0.99	10.65	9.66
			ΔSNP	8	0.99	8.82	7.83
			Gprime	8	0.99	10.65	9.66
		0.995	Bayes	8	0.99	11.94	10.95
			ED	8	0.99	8.82	7.83
			ΔSNP	8	0.99	8.82	7.83
			Gprime	8	0.99	8.82	7.83
		0.999	Bayes	8	0.99	5.94	4.95
			ED	8	0.99	5.94	4.95
			ΔSNP	8	0.99	5.94	4.95
			Gprime	8	1.46	5.94	4.48
Notes: a: Multiple thresholds were used to declare the candidate region by defining P-value and quantile; b: The statistics used to identify the candidate region; c: The chromosome that contains the candidate region; d: The start position of the candidate region; e: The end position of the candidate region; f: The length of the candidate region
