# Supplementary material for: PNGSeqR: An R Package for Rapid Candidate Gene Selection through Pooled Next-Generation Sequencing
Source: Plants (Basel). 2022 Jul 11;11(14):1821. doi: 10.3390/plants11141821 (PMC9315718; doi:10.3390/plants11141821)
Supplement: Supplementary file 1 [file plants-11-01821-s001.zip › Table S8.xlsx]

## Sheet: Sheet1
Table S8. The candidate region for maize small kernel mutant identified by PNGseqR (using 1/2 RNA-seq reads)
	Criteriaa		Methodsb	Chromc	Startd	Ende	Lengthf
					——————Mb——————
	P-value	0.01	Bayes	8	0.43	11.28	10.85
			ED	8	0.43	11.03	10.6
			ΔSNP	8	0.43	10.21	9.78
			Gprime	8	0.43	10.65	10.22
		0.005	Bayes	8	0.43	10.65	10.22
			ED	8	0.43	10.49	10.06
			ΔSNP	8	0.43	9.36	8.93
			Gprime	8	0.43	10.48	10.05
		0.001	Bayes	8	0.43	4.75	4.32
			ED	8	0.43	3.77	3.34
			ΔSNP	8	0.43	2.67	2.24
			Gprime	8	0.43	2.67	2.24
	Quantile	0.99	Bayes	8	0.43	11.28	10.85
			ED	8	0.43	11.03	10.6
			ΔSNP	8	0.43	11.28	10.85
			Gprime	8	0.43	10.65	10.22
		0.995	Bayes	8	0.43	10.65	10.22
			ED	8	0.43	10.65	10.22
			ΔSNP	8	0.43	10.65	10.22
			Gprime	8	0.43	10.48	10.05
		0.999	Bayes	8	0.43	3.53	3.1
			ED	8	0.43	3.53	3.1
			ΔSNP	8	0.43	3.53	3.1
			Gprime	8	0.43	3.53	3.1
Notes: a: Multiple thresholds were used to declare the candidate region by defining P-value and quantile; b: The statistics used to identify the candidate region; c: The chromosome that contains the candidate region; d: The start position of the candidate region; e: The end position of the candidate region; f: The length of the candidate region
